# Supplementary material for: Pd/Xiang-Phos-catalyzed enantioselective intermolecular carboheterofunctionalization of norbornene and norbornadiene
Source: Royal Society of Chemistry journal article supplement (doi:10.1039/d0cc04996d), 2020-01-01

## Supporting Information

---

# **Pd/Xiang-Phos-catalyzed                      Enantioselective                      Intermolecular Carboheterofunctionalization of Norbornene and Norbornadiene**

Mengna Tao, <sup>a</sup> Wenbo Li <sup>\*a</sup> and Junliang Zhang <sup>\*a, b, c</sup>

<sup>a</sup> Shanghai Key Laboratory of Green Chemistry and Chemical Processes, School of Chemistry and Molecular Engineering, East China Normal University, 3663 N. Zhongshan Road, Shanghai 200062, P. R. China.

<sup>b</sup> Department of Chemistry, Fudan University, 2005 Songhu Road, Shanghai 200438, P. R. China

<sup>c</sup> State Key Laboratory of Organometallic Chemistry, Shanghai Institute of Organic Chemistry, CAS, 345 Lingling Road, Shanghai, 200032 P. R. China

E-mail: [jlzhang@chem.ecnu.edu.cn](mailto:jlzhang@chem.ecnu.edu.cn) ; [wbli@chem.ecnu.edu.cn](mailto:wbli@chem.ecnu.edu.cn)  
[junliangzhang@fudan.edu.cn](mailto:junliangzhang@fudan.edu.cn)

**Table of Contents**

|          |                                                                                                         |            |
|----------|---------------------------------------------------------------------------------------------------------|------------|
| <b>1</b> | <b>General Information.....</b>                                                                         | <b>S3</b>  |
| <b>2</b> | <b>Optimization of the intermolecular carboheterofunctionalization.....</b>                             | <b>S4</b>  |
| 2.1      | Screened representative <b>Sadphos</b> ligands on the intermolecular carboamination of norbornene.....  | S4         |
| 2.2      | Optimization of the intermolecular carboamination of norbornene.....                                    | S5         |
| 2.3      | Optimization of the intermolecular carboetherification of norbornene.....                               | S7         |
| <b>3</b> | <b>Experimental procedures.....</b>                                                                     | <b>S9</b>  |
| 3.1      | General procedure for the intermolecular carboamination using 2-bromoaniline derivatives (GP1).....     | S9         |
| 3.2      | General procedure for the intermolecular carboetherification using 2-bromophenol derivatives (GP2)..... | S9         |
| <b>4</b> | <b>Gram Scale Preparation of 3a.....</b>                                                                | <b>S10</b> |
| <b>5</b> | <b>General Data for 3, 5, 7 and 8.....</b>                                                              | <b>S11</b> |
| <b>6</b> | <b>X-ray structure of 3a and 5e.....</b>                                                                | <b>S31</b> |
| <b>7</b> | <b>Confirmation of the absolute configuration of 3t, 3u, 7 and 8.....</b>                               | <b>S32</b> |
| <b>8</b> | <b>References.....</b>                                                                                  | <b>S33</b> |
| <b>9</b> | <b><sup>1</sup>H, <sup>13</sup>C, <sup>19</sup>F Spectra for 3, 5 and 7.....</b>                        | <b>S34</b> |

## Supporting Information

---

### 1. General Information

Unless otherwise noted, all reactions were carried out under a nitrogen atmosphere; materials obtained from commercial suppliers were used directly without further purification. The  $[\alpha]_D$  was recorded using PolAAr 3005 High Accuracy Polarimeter.  $^1\text{H}$  NMR spectra were recorded on a Bruker 400 MHz or 500 MHz spectrometer in chloroform- $d_3$ ;  $^{13}\text{C}$  NMR spectra were recorded on a Bruker 101 MHz or 126 MHz spectrometer in chloroform- $d_3$ ;  $^{19}\text{F}$  NMR spectra were recorded on a Bruker 376 MHz spectrometer in chloroform- $d_3$ . Chemical shifts (in ppm) were referenced to tetramethylsilane ( $\delta = 0$  ppm) in  $\text{CDCl}_3$  as an internal standard. The data is being reported as (s = singlet, d = doublet, dd = doublet of doublet, t = triplet, m = multiplet or unresolved, br = broad signal, coupling constant(s) in Hz, integration).

Trichloromethane ( $\text{CHCl}_3$ ), dichloromethane, 1,2-dichloroethane and acetonitrile were freshly distilled from  $\text{CaH}_2$ ; tetrahydrofuran (THF), toluene and ether were dried with sodium and benzophenone, and distilled before use.

Reactions were monitored by thin layer chromatography (TLC) using silicycle pre-coated silica gel plates. Flash column chromatography was performed on silica gel 60 (particle size 200-400 mesh ASTM, purchased from Yantai, China) and eluted with petroleum ether/ethyl acetate. 2-Br-aniline derivatives **1a-1t** were synthesized according to the corresponding literature<sup>[1]</sup>. Other reagents and solvents were used as received from commercial sources (*Energy Chemical*, *J&K*<sup>®</sup>, *Adamas-beta*<sup>®</sup>, *Bidepharm*) without further purification. The enantiomeric excesses of the products were determined by chiral stationary phase HPLC using a Chiralpak IB, IC, IF, OJ-H.

## 2. Optimization of the intermolecular carboheterofunctionalizations

2.1 Scheme S1. Screened representative **Sadphos** ligands on the intermolecular carboamination of norbornene and **1a**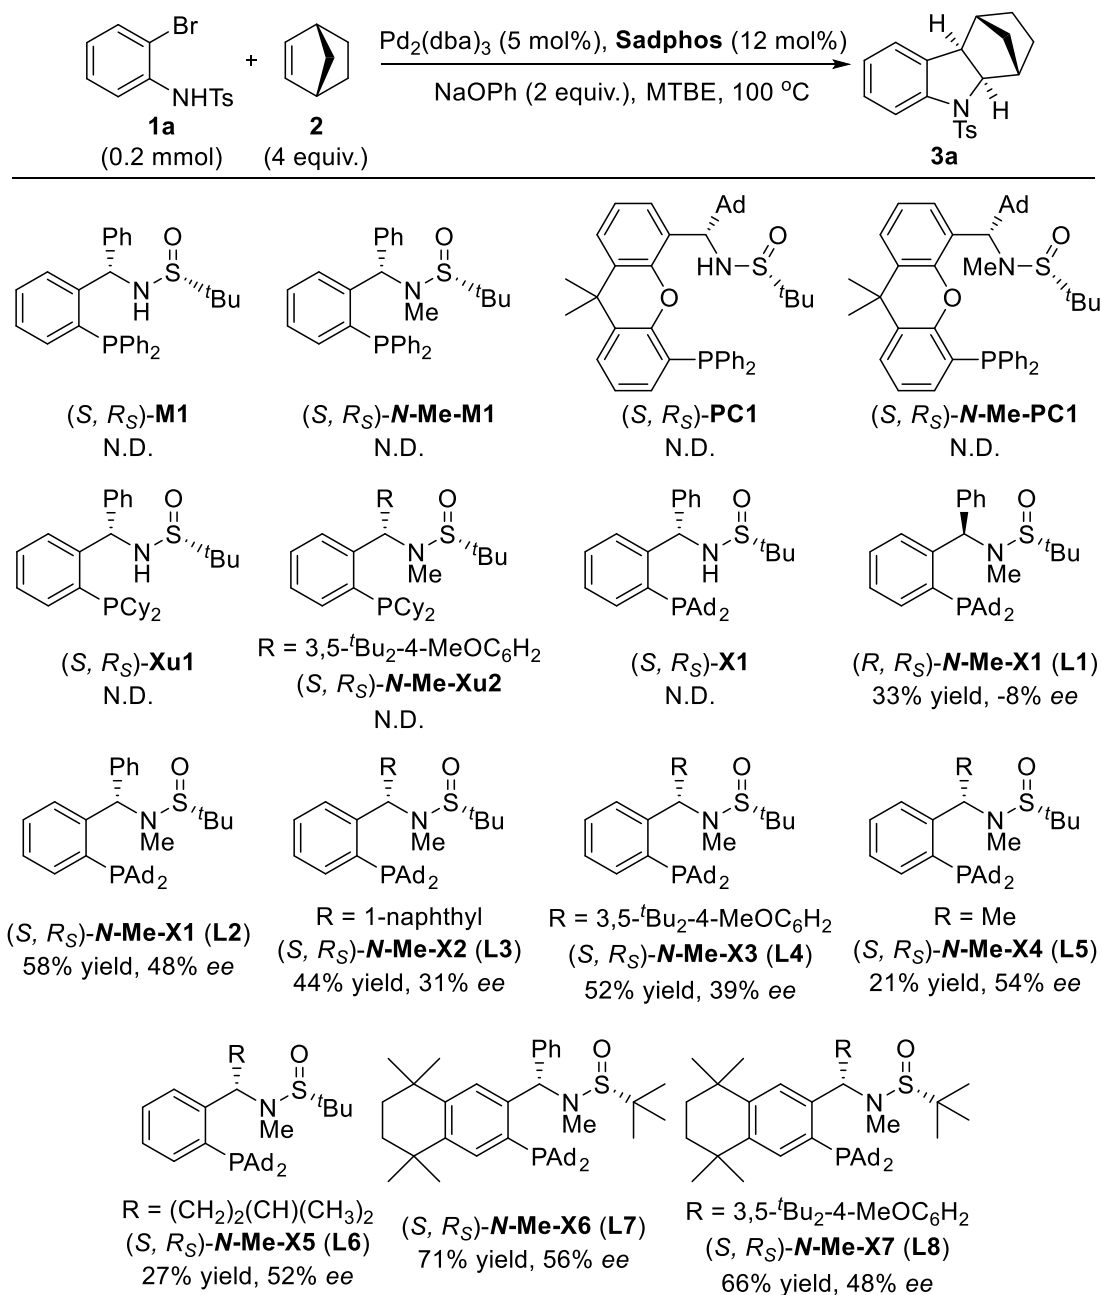

## Supporting Information

### 2.2 Table S1. Detailed optimization of the enantioselective intermolecular carboamination of norbornene and **1a**<sup>[a]</sup>

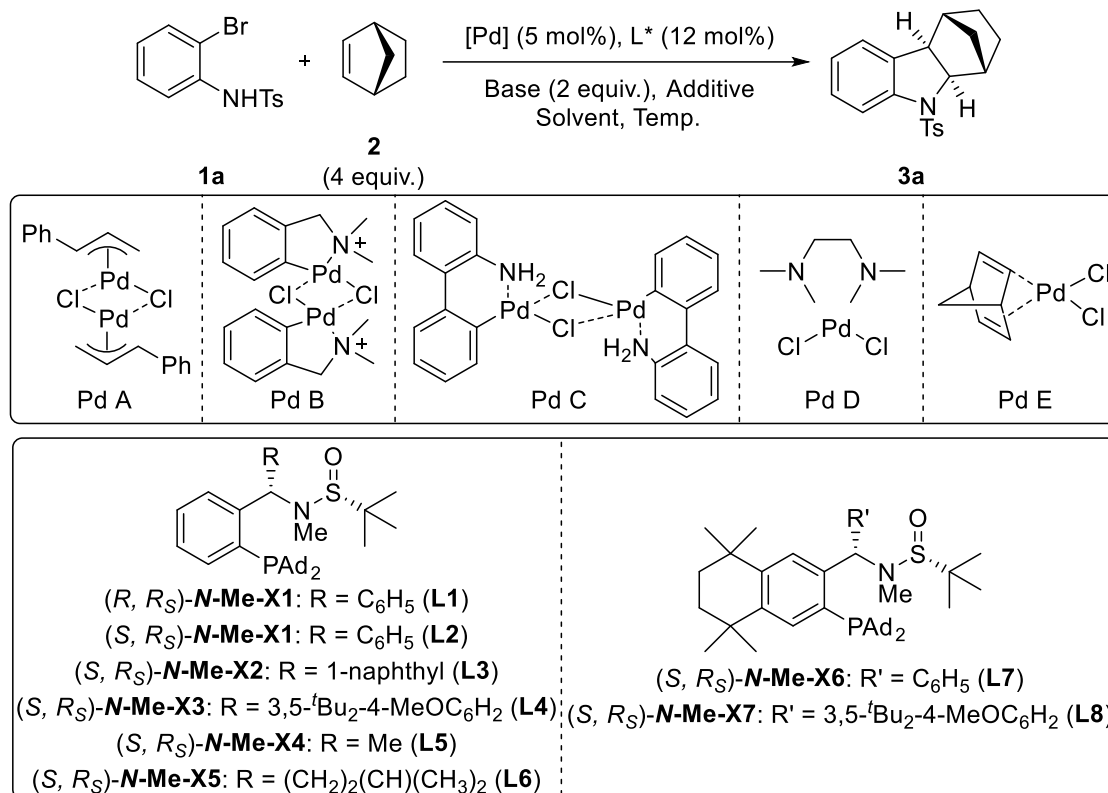

| Entry | Pd                                 | L*        | Base                            | Additive | Solvent           | Temp. (°C) | Yield (Ee) (%) <sup>[b,c]</sup> |
|-------|------------------------------------|-----------|---------------------------------|----------|-------------------|------------|---------------------------------|
| 1     | Pd <sub>2</sub> (dba) <sub>3</sub> | <b>L7</b> | CH <sub>3</sub> OLi             | -        | MTBE              | 100        | 33(18)                          |
| 2     | Pd <sub>2</sub> (dba) <sub>3</sub> | <b>L7</b> | LiO <sup>t</sup> Bu             | -        | MTBE              | 100        | 51(16)                          |
| 3     | Pd <sub>2</sub> (dba) <sub>3</sub> | <b>L7</b> | EtONa                           | -        | MTBE              | 100        | 49(39)                          |
| 4     | Pd <sub>2</sub> (dba) <sub>3</sub> | <b>L7</b> | NaO <sup>t</sup> Bu             | -        | MTBE              | 100        | 65(26.2)                        |
| 5     | Pd <sub>2</sub> (dba) <sub>3</sub> | <b>L7</b> | KO <sup>t</sup> Bu              | -        | MTBE              | 100        | 52(31)                          |
| 6     | Pd <sub>2</sub> (dba) <sub>3</sub> | <b>L7</b> | CsF                             | -        | MTBE              | 100        | 37(38.6)                        |
| 7     | Pd <sub>2</sub> (dba) <sub>3</sub> | <b>L7</b> | Na <sub>2</sub> CO <sub>3</sub> | -        | MTBE              | 100        | 29(-9)                          |
| 8     | Pd <sub>2</sub> (dba) <sub>3</sub> | <b>L7</b> | K <sub>3</sub> PO <sub>4</sub>  | -        | MTBE              | 100        | 55(43.4)                        |
| 9     | Pd <sub>2</sub> (dba) <sub>3</sub> | <b>L7</b> | DABCO                           | -        | MTBE              | 100        | 0                               |
| 10    | Pd <sub>2</sub> (dba) <sub>3</sub> | <b>L7</b> | <i>i</i> Pr <sub>2</sub> NEt    | -        | MTBE              | 100        | 0                               |
| 11    | Pd <sub>2</sub> (dba) <sub>3</sub> | <b>L7</b> | NaOPh                           | -        | MTBE              | 100        | 71(55.5)                        |
| 12    | Pd <sub>2</sub> (dba) <sub>3</sub> | <b>L7</b> | NaOPh                           | -        | 2-Me-THF          | 100        | 42(22.7)                        |
| 13    | Pd <sub>2</sub> (dba) <sub>3</sub> | <b>L7</b> | NaOPh                           | -        | 1,4-dioxane       | 100        | 34(12.5)                        |
| 14    | Pd <sub>2</sub> (dba) <sub>3</sub> | <b>L7</b> | NaOPh                           | -        | DCM               | 100        | 82(79.7)                        |
| 15    | Pd <sub>2</sub> (dba) <sub>3</sub> | <b>L7</b> | NaOPh                           | -        | DCE               | 100        | 84(77.9)                        |
| 16    | Pd <sub>2</sub> (dba) <sub>3</sub> | <b>L7</b> | NaOPh                           | -        | CHCl <sub>3</sub> | 100        | 75(59.8)                        |
| 17    | Pd <sub>2</sub> (dba) <sub>3</sub> | <b>L7</b> | NaOPh                           | -        | Toluene           | 100        | 79(66.9)                        |
| 18    | Pd <sub>2</sub> (dba) <sub>3</sub> | <b>L7</b> | NaOPh                           | -        | PhCF <sub>3</sub> | 100        | 80(75.6)                        |

## Supporting Information

|                   |                                                       |           |       |     |      |     |          |
|-------------------|-------------------------------------------------------|-----------|-------|-----|------|-----|----------|
| 19                | Pd <sub>2</sub> (dba) <sub>3</sub>                    | <b>L7</b> | NaOPh | -   | MeOH | 100 | 63(57.1) |
| 20                | Pd(dba) <sub>2</sub>                                  | <b>L7</b> | NaOPh | -   | DCM  | 100 | 66(75)   |
| 21                | Pd <sub>2</sub> (dba) <sub>3</sub> •CHCl <sub>3</sub> | <b>L7</b> | NaOPh | -   | DCM  | 100 | 77(75)   |
| 22                | Pd(OAc) <sub>2</sub>                                  | <b>L7</b> | NaOPh | -   | DCM  | 100 | 69(71)   |
| 23                | Pd A                                                  | <b>L7</b> | NaOPh | -   | DCM  | 100 | 73(75)   |
| 24                | Pd B                                                  | <b>L7</b> | NaOPh | -   | DCM  | 100 | 82(77)   |
| 25                | Pd C                                                  | <b>L7</b> | NaOPh | -   | DCM  | 100 | 77(71.7) |
| 26                | Pd D                                                  | <b>L7</b> | NaOPh | -   | DCM  | 100 | 25(83.3) |
| 27                | Pd E                                                  | <b>L7</b> | NaOPh | -   | DCM  | 100 | 59(72.3) |
| 28                | Pd B                                                  | <b>L7</b> | NaOPh | 3 Å | DCM  | 100 | 75(83.5) |
| 29                | Pd B                                                  | <b>L7</b> | NaOPh | 4 Å | DCM  | 100 | 78(89.1) |
| 30                | Pd B                                                  | <b>L7</b> | NaOPh | 5 Å | DCM  | 100 | 69(69.3) |
| 31                | Pd B                                                  | <b>L1</b> | NaOPh | 4 Å | DCM  | 100 | 53(-8.4) |
| 32                | Pd B                                                  | <b>L2</b> | NaOPh | 4 Å | DCM  | 100 | 73(66.1) |
| 33                | Pd B                                                  | <b>L3</b> | NaOPh | 4 Å | DCM  | 100 | 54(51.7) |
| 34                | Pd B                                                  | <b>L4</b> | NaOPh | 4 Å | DCM  | 100 | 66(56.5) |
| 35                | Pd B                                                  | <b>L5</b> | NaOPh | 4 Å | DCM  | 100 | 33(81.3) |
| 36                | Pd B                                                  | <b>L6</b> | NaOPh | 4 Å | DCM  | 100 | 41(80.8) |
| 37                | Pd B                                                  | <b>L8</b> | NaOPh | 4 Å | DCM  | 100 | 71(78.6) |
| 38 <sup>[d]</sup> | Pd B                                                  | <b>L7</b> | NaOPh | 4 Å | DCM  | 80  | 79(92)   |
| 39 <sup>[e]</sup> | Pd B                                                  | <b>L7</b> | NaOPh | 4 Å | DCM  | 80  | 41(94.5) |
| 40 <sup>[d]</sup> | Pd B                                                  | <b>L7</b> | NaOPh | 4 Å | DCM  | 60  | 50(97)   |
| 41 <sup>[d]</sup> | Pd B                                                  | <b>L7</b> | NaOPh | 4 Å | DCM  | 50  | 27(98)   |
| 42 <sup>[d]</sup> | Pd B                                                  | <b>L7</b> | NaOPh | 4 Å | DCM  | 25  | trace    |

[a] Unless otherwise specified, all reactions were carried out with **1a** (0.2 mmol), **2** (4 equiv.), [Pd] source (5 mol%), *N*-**Me-Xiang-Phos** (12 mol%), Base (2 equiv.), additive (50 mg) in solvent (0.2 M) for 24 hours. [b] Yield of isolated product. [c] Determined by chiral HPLC. [d] **L7** was added to 20 mol%. [e] 2 mol% [Pd] and 10 mol% **L7** were employed.

## Supporting Information

2.3 Table S2. Detailed optimization of the enantioselective intermolecular carbocyclization of norbornene and **4a**<sup>[a]</sup>

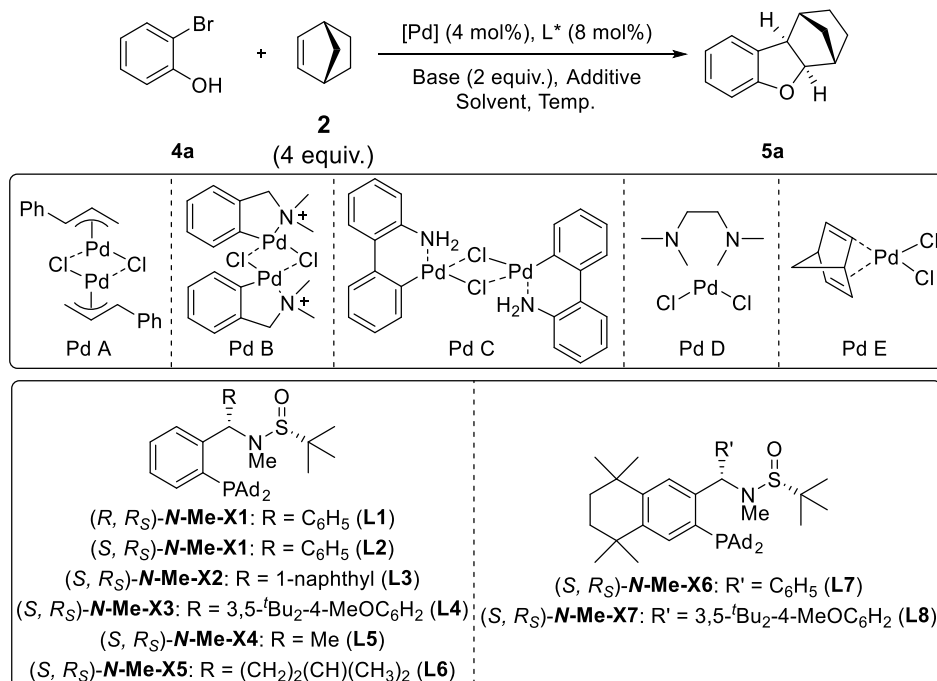

| Entry | Pd                                 | L*        | Base                            | Additive | Solvent | Temp. (°C) | Yield (Ee) (%) <sup>[b,c]</sup> |
|-------|------------------------------------|-----------|---------------------------------|----------|---------|------------|---------------------------------|
| 1     | Pd <sub>2</sub> (dba) <sub>3</sub> | <b>L1</b> | NaOPh                           | -        | MTBE    | 100        | trace                           |
| 2     | Pd <sub>2</sub> (dba) <sub>3</sub> | <b>L2</b> | NaOPh                           | -        | MTBE    | 100        | 64(70)                          |
| 3     | Pd <sub>2</sub> (dba) <sub>3</sub> | <b>L3</b> | NaOPh                           | -        | MTBE    | 100        | 44(62)                          |
| 4     | Pd <sub>2</sub> (dba) <sub>3</sub> | <b>L4</b> | NaOPh                           | -        | MTBE    | 100        | 70(61)                          |
| 5     | Pd <sub>2</sub> (dba) <sub>3</sub> | <b>L5</b> | NaOPh                           | -        | MTBE    | 100        | trace                           |
| 6     | Pd <sub>2</sub> (dba) <sub>3</sub> | <b>L6</b> | NaOPh                           | -        | MTBE    | 100        | trace                           |
| 7     | Pd <sub>2</sub> (dba) <sub>3</sub> | <b>L7</b> | NaOPh                           | -        | MTBE    | 100        | 45(72)                          |
| 8     | Pd <sub>2</sub> (dba) <sub>3</sub> | <b>L8</b> | NaOPh                           | -        | MTBE    | 100        | 51(64)                          |
| 9     | Pd <sub>2</sub> (dba) <sub>3</sub> | <b>L2</b> | CH <sub>3</sub> ONa             | -        | MTBE    | 100        | 11(58)                          |
| 10    | Pd <sub>2</sub> (dba) <sub>3</sub> | <b>L2</b> | EtONa                           | -        | MTBE    | 100        | trace                           |
| 11    | Pd <sub>2</sub> (dba) <sub>3</sub> | <b>L2</b> | NaO <sup>t</sup> Bu             | -        | MTBE    | 100        | 15(89)                          |
| 12    | Pd <sub>2</sub> (dba) <sub>3</sub> | <b>L2</b> | HCOONa                          | -        | MTBE    | 100        | trace                           |
| 13    | Pd <sub>2</sub> (dba) <sub>3</sub> | <b>L2</b> | CH <sub>3</sub> OLi             | -        | MTBE    | 100        | trace                           |
| 14    | Pd <sub>2</sub> (dba) <sub>3</sub> | <b>L2</b> | LiO <sup>t</sup> Bu             | -        | MTBE    | 100        | trace                           |
| 15    | Pd <sub>2</sub> (dba) <sub>3</sub> | <b>L2</b> | KO <sup>t</sup> Bu              | -        | MTBE    | 100        | N.D.                            |
| 16    | Pd <sub>2</sub> (dba) <sub>3</sub> | <b>L2</b> | Na <sub>2</sub> CO <sub>3</sub> | -        | MTBE    | 100        | N.D.                            |
| 17    | Pd <sub>2</sub> (dba) <sub>3</sub> | <b>L2</b> | K <sub>3</sub> PO <sub>4</sub>  | -        | MTBE    | 100        | 42(50)                          |
| 18    | Pd <sub>2</sub> (dba) <sub>3</sub> | <b>L2</b> | K <sub>2</sub> CO <sub>3</sub>  | -        | MTBE    | 100        | 45(49)                          |
| 19    | Pd <sub>2</sub> (dba) <sub>3</sub> | <b>L2</b> | Cs <sub>2</sub> CO <sub>3</sub> | -        | MTBE    | 100        | 50(44)                          |
| 20    | Pd <sub>2</sub> (dba) <sub>3</sub> | <b>L2</b> | CsF                             | -        | MTBE    | 100        | 49(48)                          |

## Supporting Information

|                   |                                                       |           |                              |     |                   |     |          |
|-------------------|-------------------------------------------------------|-----------|------------------------------|-----|-------------------|-----|----------|
| 21                | Pd <sub>2</sub> (dba) <sub>3</sub>                    | <b>L2</b> | DABCO                        | -   | MTBE              | 100 | N.D.     |
| 22                | Pd <sub>2</sub> (dba) <sub>3</sub>                    | <b>L2</b> | <i>i</i> Pr <sub>2</sub> NEt | -   | MTBE              | 100 | N.D.     |
| 23                | Pd <sub>2</sub> (dba) <sub>3</sub>                    | <b>L2</b> | NaO <sup>t</sup> Bu          | -   | THF               | 100 | N.D.     |
| 24                | Pd <sub>2</sub> (dba) <sub>3</sub>                    | <b>L2</b> | NaO <sup>t</sup> Bu          | -   | 2-Me-THF          | 100 | N.D.     |
| 25                | Pd <sub>2</sub> (dba) <sub>3</sub>                    | <b>L2</b> | NaO <sup>t</sup> Bu          | -   | 1,4-dioxane       | 100 | N.D.     |
| 26                | Pd <sub>2</sub> (dba) <sub>3</sub>                    | <b>L2</b> | NaO <sup>t</sup> Bu          | -   | DME               | 100 | 29(25)   |
| 27                | Pd <sub>2</sub> (dba) <sub>3</sub>                    | <b>L2</b> | NaO <sup>t</sup> Bu          | -   | DCM               | 100 | 18(83)   |
| 28                | Pd <sub>2</sub> (dba) <sub>3</sub>                    | <b>L2</b> | NaO <sup>t</sup> Bu          | -   | DCE               | 100 | 22(80)   |
| 29                | Pd <sub>2</sub> (dba) <sub>3</sub>                    | <b>L2</b> | NaO <sup>t</sup> Bu          | -   | CHCl <sub>3</sub> | 100 | 15(74)   |
| 30                | Pd <sub>2</sub> (dba) <sub>3</sub>                    | <b>L2</b> | NaO <sup>t</sup> Bu          | -   | Toluene           | 100 | 16(85)   |
| 31                | Pd <sub>2</sub> (dba) <sub>3</sub>                    | <b>L2</b> | NaO <sup>t</sup> Bu          | -   | PhCF <sub>3</sub> | 100 | 14(77.7) |
| 32                | Pd <sub>2</sub> (dba) <sub>3</sub>                    | <b>L2</b> | NaO <sup>t</sup> Bu          | -   | MeOH              | 100 | trace    |
| 33                | Pd <sub>2</sub> (dba) <sub>3</sub>                    | <b>L2</b> | NaO <sup>t</sup> Bu          | 3 Å | MTBE              | 100 | 40(86)   |
| 34                | Pd <sub>2</sub> (dba) <sub>3</sub>                    | <b>L2</b> | NaO <sup>t</sup> Bu          | 4 Å | MTBE              | 100 | 38(87)   |
| 35                | Pd <sub>2</sub> (dba) <sub>3</sub>                    | <b>L2</b> | NaO <sup>t</sup> Bu          | 5 Å | MTBE              | 100 | 45(64)   |
| 36                | Pd(dba) <sub>2</sub>                                  | <b>L2</b> | NaO <sup>t</sup> Bu          | 4 Å | MTBE              | 100 | 29(86)   |
| 37                | Pd <sub>2</sub> (dba) <sub>3</sub> •CHCl <sub>3</sub> | <b>L2</b> | NaO <sup>t</sup> Bu          | 4 Å | MTBE              | 100 | 41(83)   |
| 38                | Pd(OAc) <sub>2</sub>                                  | <b>L2</b> | NaO <sup>t</sup> Bu          | 4 Å | MTBE              | 100 | 23(85)   |
| 39                | Pd A                                                  | <b>L2</b> | NaO <sup>t</sup> Bu          | 4 Å | MTBE              | 100 | trace    |
| 40                | Pd B                                                  | <b>L2</b> | NaO <sup>t</sup> Bu          | 4 Å | MTBE              | 100 | 60(90)   |
| 41                | Pd C                                                  | <b>L2</b> | NaO <sup>t</sup> Bu          | 4 Å | MTBE              | 100 | 55(83)   |
| 42                | Pd D                                                  | <b>L2</b> | NaO <sup>t</sup> Bu          | 4 Å | MTBE              | 100 | N.D.     |
| 43                | Pd E                                                  | <b>L2</b> | NaO <sup>t</sup> Bu          | 4 Å | MTBE              | 100 | 26(86)   |
| 44                | Pd B                                                  | <b>L7</b> | NaO <sup>t</sup> Bu          | 4 Å | MTBE              | 100 | 56(93)   |
| 45 <sup>[d]</sup> | Pd B                                                  | <b>L7</b> | NaO <sup>t</sup> Bu          | 4 Å | MTBE              | 100 | 50(86)   |
| 46 <sup>[e]</sup> | Pd B                                                  | <b>L7</b> | NaO <sup>t</sup> Bu          | 4 Å | MTBE              | 100 | 68(93)   |

[a] Unless otherwise specified, all reactions were carried out with **4a** (0.2 mmol), **2** (4 equiv.), [Pd] source (4 mol%), *N*-**Me-Xiang-Phos** (8 mol%), Base (2 equiv.), additive (50 mg) in solvent (0.2 M) for 36 hours. [b] Yield of isolated product. [c] Determined by chiral HPLC. [d] 4 mol% [Pd] and 10 mol% **L7** were employed. [e] 5 mol% [Pd] and 12 mol% **L7** were employed.



## Supporting Information

### 3. Experimental procedures <sup>[2]</sup>

#### 3.1 General procedure for the intermolecular carboamination using 2-bromoaniline derivatives (GP1)

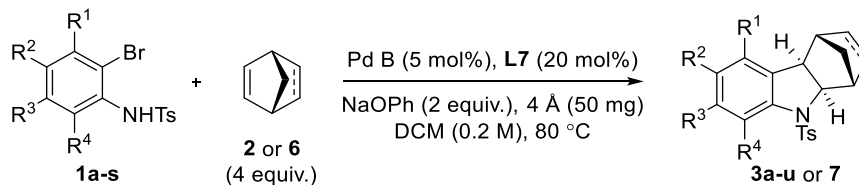

Activated 4 Å (50 mg), Pd B (5 mol%) and (*S, R<sub>S</sub>*)-**N-Me-X6** (20 mol%) were added in a sealed tube. The flask was evacuated and refilled with argon. Then 2-Br-anilines **1** (0.2 mmol) and dry DCM (1 mL) were added to the tube. NaOPh (2 equiv.) was subsequently added under a flow of argon, followed by **2** or **6** (4 equiv.). The mixture was stirred at 80 °C for 24-36 h. After the reaction was completed (monitored by TLC), solvent was removed under reduced pressure. The crude product was then purified by flash column chromatography on silica gel using hexane/EtOAc as the eluent to afford the desired product **3** or **7**.

#### 3.2 General procedure for the intermolecular carboetherification using 2-bromophenol derivatives (GP2)

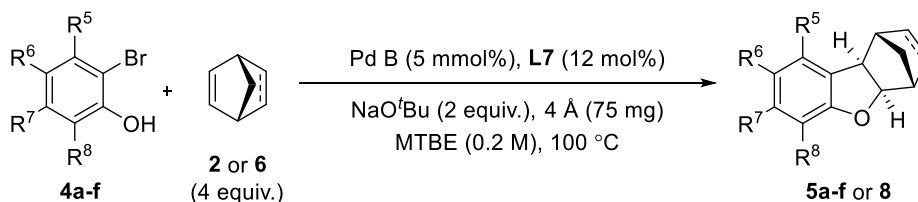

Activated 4 Å (75 mg), Pd **B** (5 mol%), (*S, R<sub>S</sub>*)-**N-Me-X6** (12 mol%) were added in a sealed tube. The flask was evacuated and refilled with argon. Then 2-Br-phenols **4** (0.3 mmol) and dry MTBE (1.5 mL) were added to the tube. NaO<sup>t</sup>Bu (2 equiv.) was subsequently added under a flow of argon, followed by **2** or **6** (4 equiv.). The mixture was stirred at 100 °C for 36-48 h. After the reaction was completed (monitored by TLC), solvent was removed under reduced pressure. The crude product was then purified by flash column chromatography on silica gel using hexane/Et<sub>2</sub>O as the eluent to afford the desired product **5** or **8**.

## Supporting Information

### 4. Gram Scale Preparation of **3a**

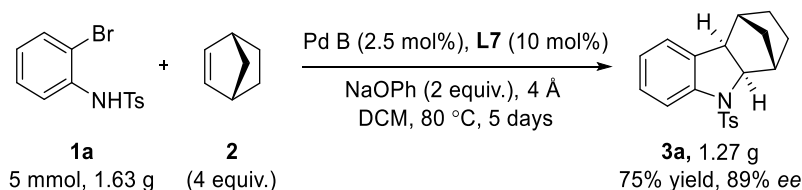

Activated 4 Å (500 mg), Pd B (2.5 mol%, 69 mg) and (*S, R<sub>S</sub>*)-*N*-Me-X6 (10 mol%, 356 mg) were added in a sealed tube. The flask was evacuated and refilled with argon. Then *N*-(2-bromophenyl)-4-methylbenzenesulfonamide **1a** (5 mmol, 1.63 g) and dry DCM (10 mL) were added to the tube. NaOPh (2 equiv., 1.16 g) was subsequently added under a flow of argon, followed by **2** (4 equiv., 1.88 g). The mixture was stirred at 80 °C for 5 days. After the reaction was completed (monitored by TLC), solvent was removed under reduced pressure. The crude product was then purified by flash column chromatography on silica gel using hexane/EtOAc (8:1) as the eluent to afford the desired product **3a** (1.27 g, 75% yield, 89% *ee*).

## Supporting Information

### 5. General Data for 3, 5, 7 and 8

#### (1*S*,4*R*,4*aR*,9*aR*)-9-tosyl-2,3,4,4*a*,9,9*a*-hexahydro-1*H*-1,4-methanocarbazole

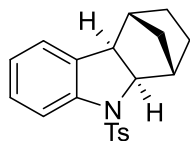

**3a**; white solid (hexane/EtOAc = 8:1, 54 mg, 79% isolated yield); m.p. = 165-167 °C;  $[\alpha]_D^{20} = 110.018$  ( $c = 0.5$ ,  $\text{CHCl}_3$ );  $^1\text{H NMR}$  (400 MHz,  $\text{CDCl}_3$ )  $\delta$  7.66 (d,  $J = 8.3$  Hz, 2H), 7.58 (d,  $J = 8.1$  Hz, 1H), 7.19 (d,  $J = 8.0$  Hz, 2H), 7.15-7.11 (m, 1H), 7.02 (d,  $J = 7.4$  Hz, 1H), 6.94 (td,  $J = 7.4, 0.9$  Hz, 1H), 3.96 (d,  $J = 8.1$  Hz, 1H), 3.08 (d,  $J = 8.1$  Hz, 1H), 2.75 (d,  $J = 1.6$  Hz, 1H), 2.34 (s, 3H), 2.24 (s, 1H), 1.60-1.58 (m, 2H), 1.37-1.35 (m, 1H), 1.30-1.27 (m, 2H), 1.15-1.12 (m, 1H).  $^{13}\text{C NMR}$  (101 MHz,  $\text{CDCl}_3$ )  $\delta$  143.72, 143.37, 134.95, 133.96, 129.55, 127.73, 127.06, 124.84, 123.63, 114.14, 69.78, 50.42, 43.89, 43.05, 32.22, 28.33, 25.29, 21.44. Enantiomeric excess: 92%, determined by HPLC (Chiralpak IC, hexane/*i*-PrOH = 93/7; flow rate 0.8 ml/min; 25 °C; 254 nm), first peak:  $t_R = 21.4$  min, second peak:  $t_R = 22.6$  min; HRMS (ESI)  $m/z$  calcd. for  $\text{C}_{20}\text{H}_{21}\text{NNaO}_2\text{S}$   $[\text{M}+\text{Na}]^+ = 362.1185$ , found = 362.1186.

<Chromatogram>  
mAU

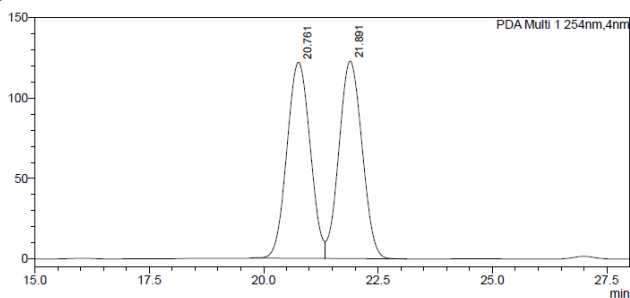

<Peak Table>

| Peak# | Ret. Time | Height | Height% | Area    | Area%   |
|-------|-----------|--------|---------|---------|---------|
| 1     | 20.761    | 121880 | 49.807  | 4303556 | 49.969  |
| 2     | 21.891    | 122826 | 50.193  | 4308825 | 50.031  |
| Total |           | 244706 | 100.000 | 8612381 | 100.000 |

<Chromatogram>  
mAU

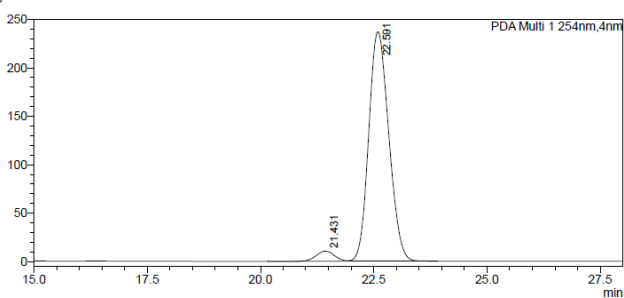

<Peak Table>

| Peak# | Ret. Time | Height | Height% | Area    | Area%   |
|-------|-----------|--------|---------|---------|---------|
| 1     | 21.431    | 10462  | 4.227   | 298469  | 3.926   |
| 2     | 22.591    | 237040 | 95.773  | 7303240 | 96.074  |
| Total |           | 247502 | 100.000 | 7601709 | 100.000 |

#### (1*S*,4*R*,4*aR*,9*aR*)-6-fluoro-9-tosyl-2,3,4,4*a*,9,9*a*-hexahydro-1*H*-1,4-methanocarbazole

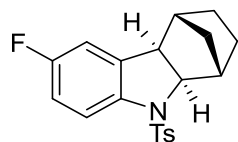

**3b**; white solid (hexane/EtOAc = 8:1, 70 mg, 98% isolated yield); m.p. = 135-136 °C;  $[\alpha]_D^{20} = 181.052$  ( $c = 0.625$ ,  $\text{CHCl}_3$ );  $^1\text{H NMR}$  (400 MHz,  $\text{CDCl}_3$ )  $\delta$  7.62 (d,  $J = 8.3$  Hz, 2H), 7.54 (dd,  $J = 8.9, 4.6$  Hz, 1H), 7.21 (d,  $J = 8.1$  Hz, 2H), 6.83 (td,  $J = 8.8, 2.7$  Hz, 1H), 6.71 (dd,  $J = 8.1, 2.5$  Hz, 1H), 3.96 (d,  $J = 8.1$  Hz, 1H), 3.04 (d,  $J = 8.1$  Hz, 1H), 2.73 (s, 1H), 2.37 (s, 3H), 2.22 (s, 1H), 1.61-1.58 (m, 2H), 1.37-1.34 (m, 1H), 1.29-1.26 (m, 2H), 1.18-1.15 (m, 1H).  $^{13}\text{C NMR}$  (101 MHz,  $\text{CDCl}_3$ )  $\delta$  159.69 (d,  $J = 243.4$  Hz), 143.92, 139.45 (d,  $J = 2.0$  Hz), 136.11 (d,  $J = 8.1$  Hz), 134.56, 129.63, 127.14, 115.25 (d,  $J = 8.1$  Hz), 114.29 (d,  $J = 23.2$  Hz), 111.91 (d,  $J = 24.2$  Hz), 70.29, 50.38, 43.96, 42.98, 32.32, 28.27, 25.24,

## Supporting Information

21.49.  $^{19}\text{F}$  NMR (376 MHz,  $\text{CDCl}_3$ )  $\delta$  -119.80. Enantiomeric excess: 91%, determined by HPLC (Chiralpak IC, hexane/*i*-PrOH = 95/5; flow rate 0.8 ml/min; 25 °C; 254 nm), first peak:  $t_R$  = 18.6 min, second peak:  $t_R$  = 19.6 min; HRMS (ESI)  $m/z$  calcd. for  $\text{C}_{20}\text{H}_{20}\text{FNNaO}_2\text{S}$   $[\text{M}+\text{Na}]^+$  = 380.1091, found = 380.1078.

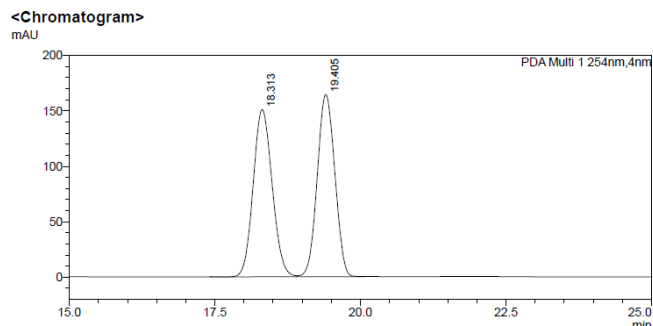

<Peak Table>

| Peak# | Ret. Time | Height | Height% | Area    | Area%   |
|-------|-----------|--------|---------|---------|---------|
| 1     | 18.313    | 150858 | 47.849  | 3421135 | 49.753  |
| 2     | 19.405    | 164423 | 52.151  | 3455128 | 50.247  |
| Total |           | 315281 | 100.000 | 6876263 | 100.000 |

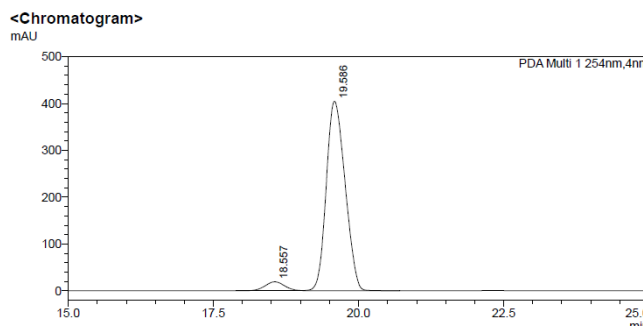

<Peak Table>

| Peak# | Ret. Time | Height | Height% | Area    | Area%   |
|-------|-----------|--------|---------|---------|---------|
| 1     | 18.557    | 19116  | 4.512   | 450847  | 4.713   |
| 2     | 19.586    | 404523 | 95.488  | 9114759 | 95.287  |
| Total |           | 423639 | 100.000 | 9565606 | 100.000 |

### (1*S*,4*R*,4*aR*,9*aR*)-6-chloro-9-tosyl-2,3,4,4*a*,9,9*a*-hexahydro-1*H*-1,4-methanocarbazole

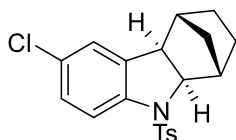

**3c**; white solid (hexane/EtOAc = 8:1, 64 mg, 86% isolated yield); m.p. = 112-113 °C;  $[\alpha]_D^{20}$  = 189.059 ( $c$  = 0.542,  $\text{CHCl}_3$ );  $^1\text{H}$  NMR (400 MHz,  $\text{CDCl}_3$ )  $\delta$  7.63 (d,  $J$  = 8.3 Hz, 2H), 7.51 (d,  $J$  = 8.6 Hz, 1H), 7.22 (d,  $J$  = 8.1 Hz, 2H), 7.10 (dd,  $J$  = 8.6, 2.1 Hz, 1H), 6.98 (d,  $J$  = 1.4 Hz, 1H), 3.96 (d,  $J$  = 8.1 Hz, 1H), 3.04 (d,  $J$  = 8.1 Hz, 1H), 2.74 (s, 1H), 2.37 (s, 3H), 2.23 (s, 1H), 1.61-1.59 (m, 2H), 1.37-1.34 (m, 1H), 1.29-1.26 (m, 2H), 1.18-1.16 (m, 1H).  $^{13}\text{C}$  NMR (101 MHz,  $\text{CDCl}_3$ )  $\delta$  144.04, 142.19, 136.00, 134.61, 129.70, 128.69, 127.77, 127.08, 125.06, 115.17, 70.22, 50.22, 43.91, 43.03, 32.30, 28.27, 25.23, 21.50. Enantiomeric excess: 96%, determined by HPLC (Chiralpak IC, hexane/*i*-PrOH = 95/5; flow rate 0.8 ml/min; 25 °C; 254 nm), first peak:  $t_R$  = 16.1 min, second peak:  $t_R$  = 16.8 min; HRMS (ESI)  $m/z$  calcd. for  $\text{C}_{20}\text{H}_{20}\text{ClINaO}_2\text{S}$   $[\text{M}+\text{Na}]^+$  = 396.0795, found = 396.0788.

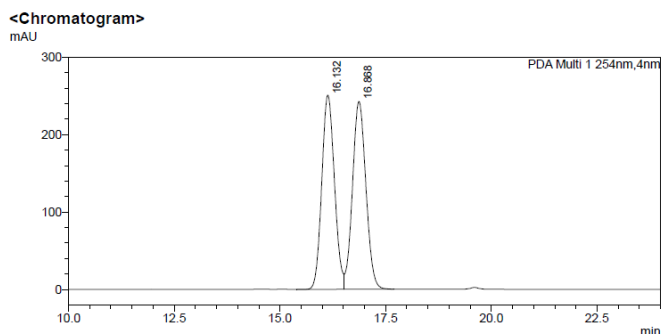

<Peak Table>

| Peak# | Ret. Time | Height | Height% | Area     | Area%   |
|-------|-----------|--------|---------|----------|---------|
| 1     | 16.132    | 251121 | 50.847  | 5243578  | 49.467  |
| 2     | 16.868    | 242755 | 49.153  | 5356585  | 50.533  |
| Total |           | 493875 | 100.000 | 10600164 | 100.000 |

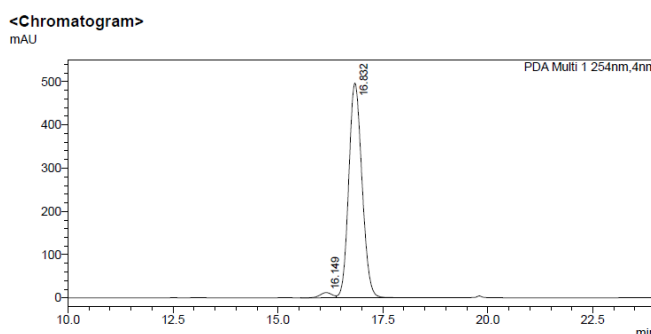

<Peak Table>

| Peak# | Ret. Time | Height | Height% | Area     | Area%   |
|-------|-----------|--------|---------|----------|---------|
| 1     | 16.149    | 12013  | 2.363   | 240238   | 2.160   |
| 2     | 16.832    | 496317 | 97.637  | 10883673 | 97.840  |
| Total |           | 508330 | 100.000 | 11123911 | 100.000 |

## Supporting Information

### (1*S*,4*R*,4*aR*,9*aR*)-6-methyl-9-tosyl-2,3,4,4*a*,9,9*a*-hexahydro-1*H*-1,4-methanocarbazole

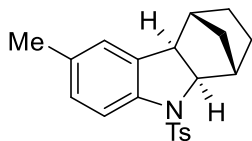

**3d**; white solid (hexane/EtOAc = 8:1, 39 mg, 55% isolated yield); m.p. = 111-112 °C;  $[\alpha]_D^{20} = 137.697$  ( $c = 0.5$ ,  $\text{CHCl}_3$ );  $^1\text{H NMR}$  (400 MHz,  $\text{CDCl}_3$ )  $\delta$  7.64 (d,  $J = 8.3$  Hz, 2H), 7.47 (d,  $J = 8.2$  Hz, 1H), 7.19 (d,  $J = 8.1$  Hz, 2H), 6.94 (d,  $J = 8.2$  Hz, 1H), 6.82 (s, 1H), 3.92 (d,  $J = 8.1$  Hz, 1H), 3.02 (d,  $J = 8.1$  Hz, 1H), 2.72 (s, 1H), 2.35 (s, 3H), 2.25 (s, 3H), 2.22 (s, 1H), 1.60-1.57 (m, 2H), 1.36 (d,  $J = 10.8$  Hz, 1H), 1.29-1.25 (m, 2H), 1.13 (d,  $J = 10.5$  Hz, 1H).  $^{13}\text{C NMR}$  (101 MHz,  $\text{CDCl}_3$ )  $\delta$  143.60, 141.05, 134.88, 134.09, 133.26, 129.53, 128.35, 127.12, 125.46, 114.02, 69.93, 50.43, 43.92, 43.01, 32.28, 28.34, 25.31, 21.46, 20.81. Enantiomeric excess: 96%, determined by HPLC (Chiralpak IC, hexane/*i*-PrOH = 95/5; flow rate 0.8 ml/min; 25 °C; 254 nm), first peak:  $t_R = 29.8$  min, second peak:  $t_R = 32.2$  min; HRMS (ESI)  $m/z$  calcd. for  $\text{C}_{21}\text{H}_{23}\text{NNaO}_2\text{S}$   $[\text{M}+\text{Na}]^+ = 376.1342$ , found = 376.1340.

<Chromatogram>  
mAU

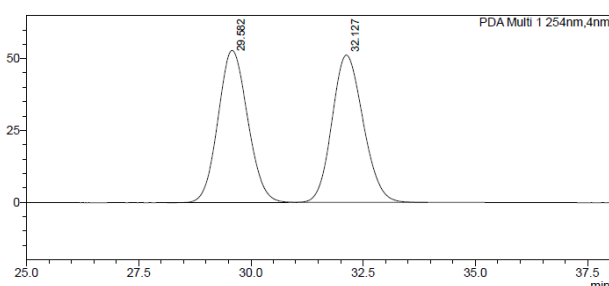

<Peak Table>

| Peak# | Ret. Time | Height | Height% | Area    | Area%   |
|-------|-----------|--------|---------|---------|---------|
| 1     | 29.582    | 52964  | 50.795  | 2443237 | 49.610  |
| 2     | 32.127    | 51307  | 49.205  | 2481671 | 50.390  |
| Total |           | 104271 | 100.000 | 4924907 | 100.000 |

<Chromatogram>  
mAU

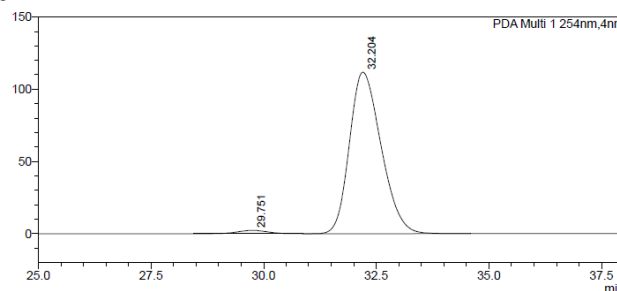

<Peak Table>

| Peak# | Ret. Time | Height | Height% | Area    | Area%   |
|-------|-----------|--------|---------|---------|---------|
| 1     | 29.751    | 2290   | 2.007   | 105788  | 1.900   |
| 2     | 32.204    | 111769 | 97.993  | 5463247 | 98.100  |
| Total |           | 114059 | 100.000 | 5569036 | 100.000 |

### (1*S*,4*R*,4*aR*,9*aR*)-6-methoxy-9-tosyl-2,3,4,4*a*,9,9*a*-hexahydro-1*H*-1,4-methanocarbazole

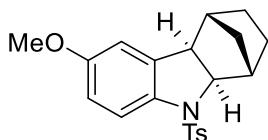

**3e**; white solid (hexane/EtOAc = 4:1, 48 mg, 65% isolated yield); m.p. = 189-191 °C;  $[\alpha]_D^{20} = 180.211$  ( $c = 0.56$ ,  $\text{CHCl}_3$ );  $^1\text{H NMR}$  (400 MHz,  $\text{CDCl}_3$ )  $\delta$  7.61 (d,  $J = 8.3$  Hz, 2H), 7.51 (d,  $J = 8.8$  Hz, 1H), 7.19 (d,  $J = 8.1$  Hz, 2H), 6.69 (dd,  $J = 8.8, 2.6$  Hz, 1H), 6.57 (d,  $J = 2.5$  Hz, 1H), 3.91 (d,  $J = 8.0$  Hz, 1H), 3.74 (s, 3H), 3.01 (d,  $J = 8.0$  Hz, 1H), 2.70 (s, 1H), 2.35 (s, 3H), 2.22 (s, 1H), 1.59-1.56 (m, 2H), 1.35 (d,  $J = 10.6$  Hz, 1H), 1.28-1.25 (m, 2H), 1.13 (d,  $J = 10.5$  Hz, 1H).  $^{13}\text{C NMR}$  (101 MHz,  $\text{CDCl}_3$ )  $\delta$  156.56, 143.60, 136.81, 135.66, 134.52, 129.50, 127.13, 115.22, 112.72, 110.50, 70.03, 55.47, 50.57, 43.90, 42.88, 32.30, 28.25, 25.25, 21.44. Enantiomeric excess: 94%, determined by HPLC (Chiralpak IC, hexane/*i*-PrOH =

## Supporting Information

95/5; flow rate 0.8 ml/min; 25 °C; 254 nm), first peak:  $t_R = 43.5$  min, second peak:  $t_R = 47.0$  min; HRMS (ESI)  $m/z$  calcd. for  $C_{21}H_{23}NNaO_3S$   $[M+Na]^+ = 392.1291$ , found = 392.1285.

<Chromatogram>  
mAU

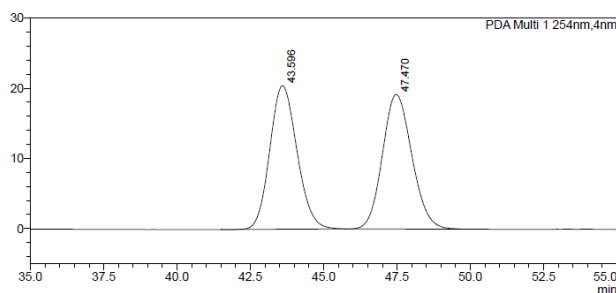

<Peak Table>

| Peak# | Ret. Time | Height | Height% | Area    | Area%   |
|-------|-----------|--------|---------|---------|---------|
| 1     | 43.596    | 20459  | 51.625  | 1321443 | 49.625  |
| 2     | 47.470    | 19171  | 48.375  | 1341394 | 50.375  |
| Total |           | 39631  | 100.000 | 2662837 | 100.000 |

<Chromatogram>  
mAU

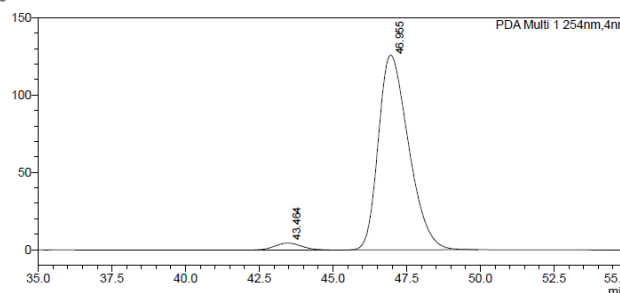

<Peak Table>

| Peak# | Ret. Time | Height | Height% | Area    | Area%   |
|-------|-----------|--------|---------|---------|---------|
| 1     | 43.464    | 4454   | 3.413   | 279049  | 3.005   |
| 2     | 46.955    | 126049 | 96.587  | 9005689 | 96.995  |
| Total |           | 130503 | 100.000 | 9284737 | 100.000 |

### (1*S*,4*R*,4*aR*,9*aR*)-9-tosyl-6-(trifluoromethyl)-2,3,4,4*a*,9,9*a*-hexahydro-1*H*-1,4-methanocarbazole

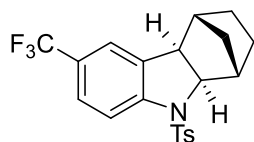

**3f**; white solid (hexane/EtOAc = 8:1, 55 mg, 67% isolated yield); m.p. = 131-132 °C;  $[\alpha]_D^{20} = 131.181$  ( $c = 0.625$ ,  $CHCl_3$ );  $^1H$  NMR (400 MHz,  $CDCl_3$ )  $\delta$  7.68 (d,  $J = 8.3$  Hz, 2H), 7.64 (d,  $J = 8.5$  Hz, 1H), 7.40 (d,  $J = 8.5$  Hz, 1H), 7.26-7.23 (m, 3H), 4.04 (d,  $J = 8.1$  Hz, 1H), 3.13 (d,  $J = 8.1$  Hz, 1H), 2.79 (s, 1H), 2.38 (s, 3H), 2.29 (s, 1H), 1.64-1.59 (m, 2H), 1.37-1.29 (m, 3H), 1.20 (d,  $J = 10.6$  Hz, 1H).  $^{13}C$  NMR (101 MHz,  $CDCl_3$ )  $\delta$  146.47, 144.31, 134.77, 134.61, 129.82, 127.02, 125.62 (q,  $J = 32.3$  Hz), 125.46 (q,  $J = 3.7$  Hz), 124.19 (q,  $J = 271.7$  Hz), 122.08 (q,  $J = 3.7$  Hz), 113.55, 70.37, 50.09, 43.84, 43.19, 32.28, 28.28, 25.23, 21.52.  $^{19}F$  NMR (376 MHz,  $CDCl_3$ )  $\delta$  -61.62. Enantiomeric excess: 99%, determined by HPLC (Chiralpak IB, hexane/*i*-PrOH = 97/3; flow rate 0.5 ml/min; 25 °C; 254 nm), first peak:  $t_R = 13.2$  min, second peak:  $t_R = 14.3$  min; HRMS (ESI)  $m/z$  calcd. for  $C_{21}H_{20}F_3NNaO_2S$   $[M+Na]^+ = 430.1059$ , found = 430.1045.

<Chromatogram>  
mAU

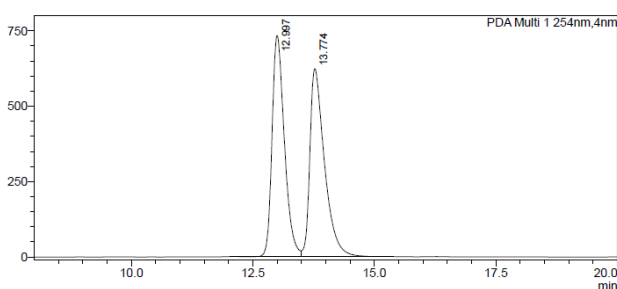

<Peak Table>

| Peak# | Ret. Time | Height  | Height% | Area     | Area%   |
|-------|-----------|---------|---------|----------|---------|
| 1     | 12.997    | 732675  | 54.040  | 12928407 | 49.854  |
| 2     | 13.774    | 623138  | 45.960  | 13004154 | 50.146  |
| Total |           | 1355813 | 100.000 | 25932562 | 100.000 |

<Chromatogram>  
mAU

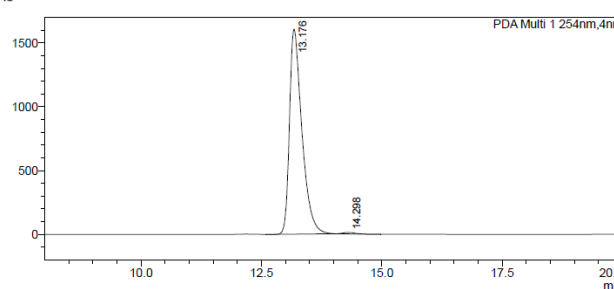

<Peak Table>

| Peak# | Ret. Time | Height  | Height% | Area     | Area%   |
|-------|-----------|---------|---------|----------|---------|
| 1     | 13.176    | 1606732 | 99.328  | 28790829 | 99.396  |
| 2     | 14.298    | 10877   | 0.672   | 175021   | 0.604   |
| Total |           | 1617609 | 100.000 | 28965850 | 100.000 |

## Supporting Information

### (1*S*,4*R*,4*aR*,9*aR*)-9-tosyl-6-(trifluoromethoxy)-2,3,4,4*a*,9,9*a*-hexahydro-1*H*-1,4-methanocarbazole

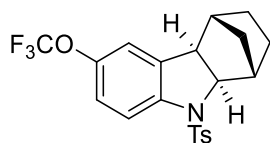

**3g**; white solid (hexane/EtOAc = 8:1, 61 mg, 72% isolated yield); m.p. = 119-120 °C;  $[\alpha]_D^{20} = 138.749$  ( $c = 0.625$ ,  $\text{CHCl}_3$ );  $^1\text{H NMR}$  (400 MHz,  $\text{CDCl}_3$ )  $\delta$  7.65 (d,  $J = 8.3$  Hz, 2H), 7.56 (d,  $J = 8.8$  Hz, 1H), 7.23 (d,  $J = 8.1$  Hz, 2H), 6.98 (d,  $J = 8.8$  Hz, 1H), 6.88 (s, 1H), 4.00 (d,  $J = 8.1$  Hz, 1H), 3.08 (d,  $J = 8.1$  Hz, 1H), 2.76 (s, 1H), 2.38 (s, 3H), 2.25 (s, 1H), 1.62-1.59 (m, 2H), 1.38-1.35 (m, 1H), 1.30-1.27 (m, 2H), 1.20-1.17 (m, 1H).  $^{13}\text{C NMR}$  (126 MHz,  $\text{CDCl}_3$ )  $\delta$  145.31, 144.11, 142.08, 135.80, 134.72, 129.73, 127.10, 120.58, 120.42 (q,  $J = 257.04$  Hz), 117.90, 114.63, 70.36, 50.26, 43.88, 43.10, 32.32, 28.28, 25.20, 21.50.  $^{19}\text{F NMR}$  (376 MHz,  $\text{CDCl}_3$ )  $\delta$  -58.12. Enantiomeric excess: 98%, determined by HPLC (Chiralpak IB, hexane/*i*-PrOH = 97/3; flow rate 0.5 ml/min; 25 °C; 254 nm), first peak:  $t_R = 13.0$  min, second peak:  $t_R = 14.2$  min; HRMS (ESI)  $m/z$  calcd. for  $\text{C}_{21}\text{H}_{20}\text{F}_3\text{NNaO}_3\text{S}$   $[\text{M}+\text{Na}]^+ = 446.1008$ , found = 446.1001.

<Chromatogram>  
mAU

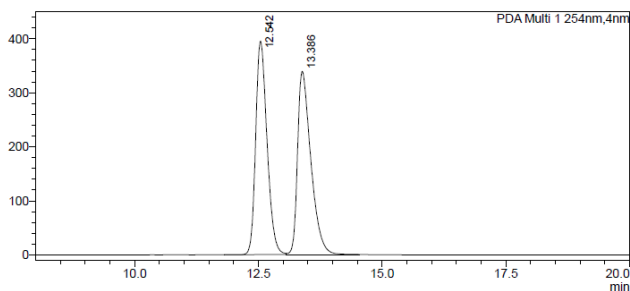

<Peak Table>

| Peak# | Ret. Time | Height | Height% | Area     | Area%   |
|-------|-----------|--------|---------|----------|---------|
| 1     | 12.542    | 395135 | 53.837  | 6289914  | 49.837  |
| 2     | 13.386    | 338817 | 46.163  | 6331109  | 50.163  |
| Total |           | 733952 | 100.000 | 12621023 | 100.000 |

<Chromatogram>  
mAU

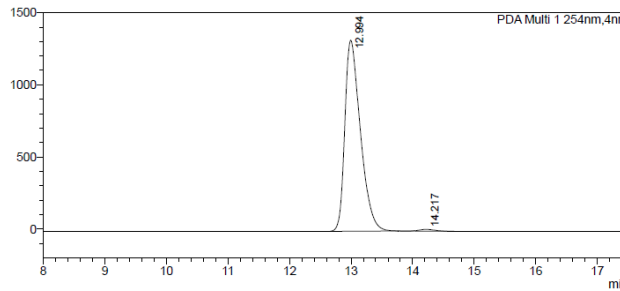

<Peak Table>

| Peak# | Ret. Time | Height  | Height% | Area     | Area%   |
|-------|-----------|---------|---------|----------|---------|
| 1     | 12.984    | 1324678 | 99.106  | 23254990 | 99.135  |
| 2     | 14.217    | 11953   | 0.894   | 202981   | 0.865   |
| Total |           | 1336631 | 100.000 | 23457971 | 100.000 |

### (1*S*,4*R*,4*aR*,9*aR*)-7-fluoro-9-tosyl-2,3,4,4*a*,9,9*a*-hexahydro-1*H*-1,4-methanocarbazole

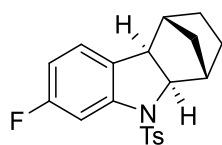

**3h**; white solid (hexane/EtOAc = 8:1, 64 mg, 90% isolated yield); m.p. = 160-162 °C;  $[\alpha]_D^{20} = 165.809$  ( $c = 0.542$ ,  $\text{CHCl}_3$ );  $^1\text{H NMR}$  (400 MHz,  $\text{CDCl}_3$ )  $\delta$  7.67 (d,  $J = 8.3$  Hz, 2H), 7.33 (dd,  $J = 10.3, 2.3$  Hz, 1H), 7.23 (d,  $J = 8.1$  Hz, 2H), 6.93 (dd,  $J = 7.7, 5.7$  Hz, 1H), 6.63 (td,  $J = 8.6, 2.4$  Hz, 1H), 3.99 (d,  $J = 8.1$  Hz, 1H), 3.03 (d,  $J = 8.1$  Hz, 1H), 2.75 (s, 1H), 2.37 (s, 3H), 2.21 (s, 1H), 1.61-1.57 (m, 2H), 1.36 (d,  $J = 9.7$  Hz, 1H), 1.29-1.25 (m, 2H), 1.18-1.14 (m, 1H).  $^{13}\text{C NMR}$  (101 MHz,  $\text{CDCl}_3$ )  $\delta$  162.63 (d,  $J = 244.4$  Hz), 144.77 (d,  $J = 11.1$  Hz), 144.08, 134.77, 129.72, 129.41 (d,  $J = 3.0$  Hz), 127.08, 125.39 (d,  $J = 10.1$  Hz), 110.20 (d,  $J = 22.2$  Hz), 102.19 (d,  $J = 28.3$  Hz), 70.78, 49.83, 43.87, 43.07, 32.17, 28.22, 25.20, 21.49.  $^{19}\text{F NMR}$  (376 MHz,  $\text{CDCl}_3$ )  $\delta$  -113.74. Enantiomeric excess: 97%, determined by HPLC

## Supporting Information

(Chiralpak IB, hexane/*i*-PrOH = 97/3; flow rate 0.5 ml/min; 25 °C; 254 nm), first peak:  $t_R = 13.1$  min, second peak:  $t_R = 14.0$  min; HRMS (ESI)  $m/z$  calcd. for  $C_{20}H_{20}FNNaO_2S$   $[M+Na]^+ = 380.1091$ , found = 380.1080.

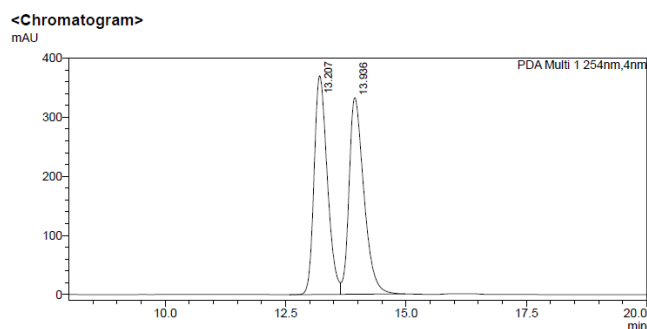

<Peak Table>  
PDA Ch1 254nm

| Peak# | Ret. Time | Height | Height% | Area     | Area%   |
|-------|-----------|--------|---------|----------|---------|
| 1     | 13.207    | 370264 | 52.663  | 7053945  | 49.777  |
| 2     | 13.936    | 332816 | 47.337  | 7117230  | 50.223  |
| Total |           | 703081 | 100.000 | 14171175 | 100.000 |

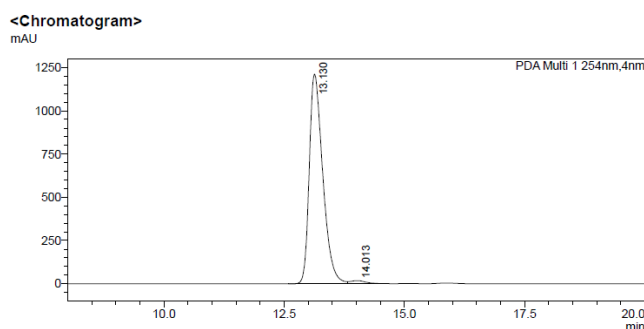

<Peak Table>  
PDA Ch1 254nm

| Peak# | Ret. Time | Height  | Height% | Area     | Area%   |
|-------|-----------|---------|---------|----------|---------|
| 1     | 13.130    | 1212280 | 98.588  | 23656937 | 98.484  |
| 2     | 14.013    | 17362   | 1.412   | 364268   | 1.516   |
| Total |           | 1229641 | 100.000 | 24021205 | 100.000 |

### (1*S*,4*R*,4*aR*,9*aR*)-7-chloro-9-tosyl-2,3,4,4*a*,9,9*a*-hexahydro-1*H*-1,4-methanocarbazole

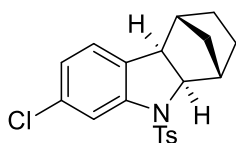

**3i**; white solid (hexane/EtOAc = 8:1, 56 mg, 75% isolated yield); m.p. = 197-199 °C;  $[\alpha]_D^{20} = 285.882$  ( $c = 0.625$ ,  $CHCl_3$ );  $^1H$  NMR (400 MHz,  $CDCl_3$ )  $\delta$  7.67 (d,  $J = 8.3$  Hz, 2H), 7.60 (d,  $J = 0.9$  Hz, 1H), 7.24 (d,  $J = 8.1$  Hz, 2H), 6.94-6.90 (m, 2H), 3.97 (d,  $J = 8.1$  Hz, 1H), 3.03 (d,  $J = 8.1$  Hz, 1H), 2.74 (s, 1H), 2.38 (s, 3H), 2.22 (s, 1H), 1.61-1.57 (m, 2H), 1.37-1.34 (m, 1H), 1.29-1.26 (m, 2H), 1.18-1.14 (m, 1H).  $^{13}C$  NMR (101 MHz,  $CDCl_3$ )  $\delta$  144.64, 144.11, 134.73, 133.45, 132.54, 129.75, 127.06, 125.57, 123.68, 114.37, 70.46, 49.97, 43.84, 43.05, 32.22, 28.26, 25.21, 21.51. Enantiomeric excess: 95%, determined by HPLC (Chiralpak IB, hexane/*i*-PrOH = 97/3; flow rate 0.5 ml/min; 25 °C; 254 nm), first peak:  $t_R = 13.3$  min, second peak:  $t_R = 14.3$  min; HRMS (ESI)  $m/z$  calcd. for  $C_{20}H_{20}ClNNaO_2S$   $[M+Na]^+ = 396.0795$ , found = 396.0786.

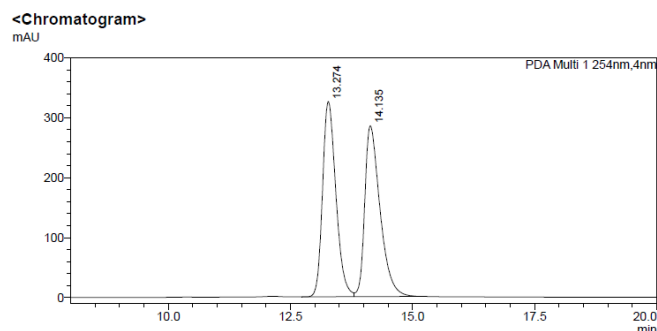

<Peak Table>  
PDA Ch1 254nm

| Peak# | Ret. Time | Height | Height% | Area     | Area%   |
|-------|-----------|--------|---------|----------|---------|
| 1     | 13.274    | 325860 | 53.323  | 6198419  | 49.946  |
| 2     | 14.135    | 285251 | 46.677  | 6211938  | 50.054  |
| Total |           | 611111 | 100.000 | 12410358 | 100.000 |

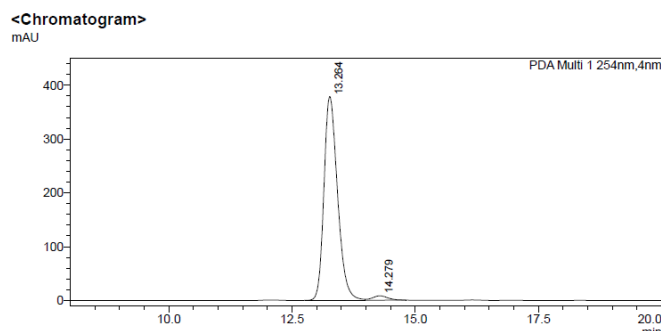

<Peak Table>  
PDA Ch1 254nm

| Peak# | Ret. Time | Height | Height% | Area    | Area%   |
|-------|-----------|--------|---------|---------|---------|
| 1     | 13.264    | 378540 | 97.880  | 7262602 | 97.616  |
| 2     | 14.279    | 8199   | 2.120   | 177403  | 2.384   |
| Total |           | 386739 | 100.000 | 7440005 | 100.000 |



## Supporting Information

### (1*S*,4*R*,4*aR*,9*aR*)-7-methyl-9-tosyl-2,3,4,4*a*,9,9*a*-hexahydro-1*H*-1,4-methanocarbazole

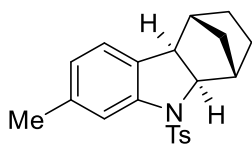

**3j**; white solid (hexane/EtOAc = 8:1, 46 mg, 65% isolated yield); m.p. = 224-225 °C;  $[\alpha]_D^{20} = 180.176$  ( $c = 0.5$ , CHCl<sub>3</sub>); <sup>1</sup>H NMR (400 MHz, CDCl<sub>3</sub>)  $\delta$  7.65 (d,  $J = 8.3$  Hz, 2H), 7.43 (s, 1H), 7.20 (d,  $J = 8.2$  Hz, 2H), 6.90 (d,  $J = 7.6$  Hz, 1H), 6.76 (d,  $J = 7.6$  Hz, 1H), 3.94 (d,  $J = 8.1$  Hz, 1H), 3.03 (d,  $J = 8.1$  Hz, 1H), 2.72 (s, 1H), 2.35 (s, 3H), 2.33 (s, 3H), 2.21 (s, 1H), 1.58-1.56 (m, 2H), 1.37-1.34 (m, 1H), 1.28-1.25 (m, 2H), 1.12 (d,  $J = 10.5$  Hz, 1H). <sup>13</sup>C NMR (101 MHz, CDCl<sub>3</sub>)  $\delta$  143.65, 143.54, 137.76, 135.06, 131.11, 129.56, 127.04, 124.40, 114.81, 70.11, 50.11, 43.85, 43.03, 32.19, 28.28, 25.31, 21.49. Enantiomeric excess: 95%, determined by HPLC (Chiralpak IB, hexane/*i*-PrOH = 97/3; flow rate 0.5 ml/min; 25 °C; 254 nm), first peak:  $t_R = 12.9$  min, second peak:  $t_R = 14.2$  min; HRMS (ESI)  $m/z$  calcd. for C<sub>21</sub>H<sub>23</sub>NNaO<sub>2</sub>S  $[M+Na]^+ = 376.1342$ , found = 376.1334.

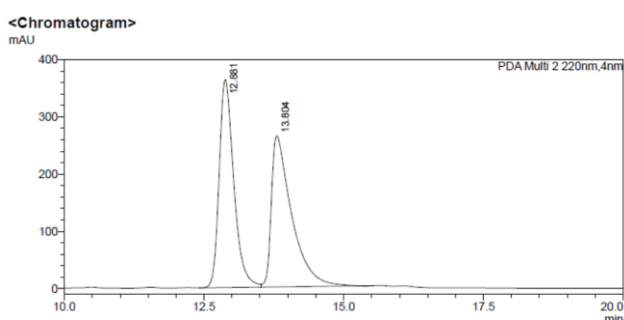

<Peak Table>  
PDA Ch2 220nm

| Peak# | Ret. Time | Height | Height% | Area     | Area%   |
|-------|-----------|--------|---------|----------|---------|
| 1     | 12.881    | 363425 | 57.902  | 6608538  | 49.781  |
| 2     | 13.804    | 264226 | 42.098  | 6666770  | 50.219  |
| Total |           | 627652 | 100.000 | 13275308 | 100.000 |

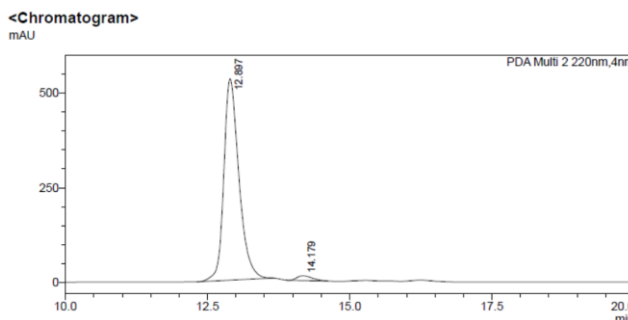

<Peak Table>  
PDA Ch2 220nm

| Peak# | Ret. Time | Height | Height% | Area     | Area%   |
|-------|-----------|--------|---------|----------|---------|
| 1     | 12.897    | 532742 | 97.712  | 9839037  | 97.671  |
| 2     | 14.179    | 12475  | 2.288   | 234566   | 2.329   |
| Total |           | 545218 | 100.000 | 10073603 | 100.000 |

### (1*S*,4*R*,4*aR*,9*aR*)-7-methoxy-9-tosyl-2,3,4,4*a*,9,9*a*-hexahydro-1*H*-1,4-methanocarbazole

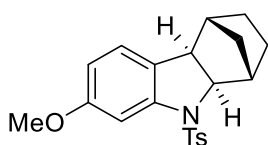

**3k**; white solid (hexane/EtOAc = 5:1, 55 mg, 74% isolated yield); m.p. = 171-173 °C;  $[\alpha]_D^{20} = 274.139$  ( $c = 0.625$ , CHCl<sub>3</sub>); <sup>1</sup>H NMR (400 MHz, CDCl<sub>3</sub>)  $\delta$  7.67 (d,  $J = 8.3$  Hz, 2H), 7.22-7.20 (m, 3H), 6.90 (d,  $J = 8.2$  Hz, 1H), 6.50 (dd,  $J = 8.2, 2.3$  Hz, 1H), 3.96 (d,  $J = 8.0$  Hz, 1H), 3.80 (s, 3H), 3.01 (d,  $J = 8.1$  Hz, 1H), 2.72 (s, 1H), 2.36 (s, 3H), 2.19 (s, 1H), 1.58-1.56 (m, 2H), 1.36 (d,  $J = 9.9$  Hz, 1H), 1.29-1.24 (m, 2H), 1.13 (d,  $J = 10.5$  Hz, 1H). <sup>13</sup>C NMR (101 MHz, CDCl<sub>3</sub>)  $\delta$  159.71, 144.57, 143.77, 134.97, 129.60, 127.11, 126.07, 125.05, 109.57, 100.33, 70.65, 55.53, 49.77, 43.88, 43.03, 32.14, 28.19, 25.28, 21.49. Enantiomeric excess: 96%, determined by HPLC (Chiralpak IC, hexane/*i*-PrOH = 95/5; flow rate 0.8

## Supporting Information

ml/min; 25 °C; 254 nm), first peak:  $t_R = 35.9$  min, second peak:  $t_R = 39.4$  min; HRMS (ESI)  $m/z$  calcd. for  $C_{21}H_{23}NNaO_3S$   $[M+Na]^+ = 392.1291$ , found = 392.1283.

<Chromatogram>

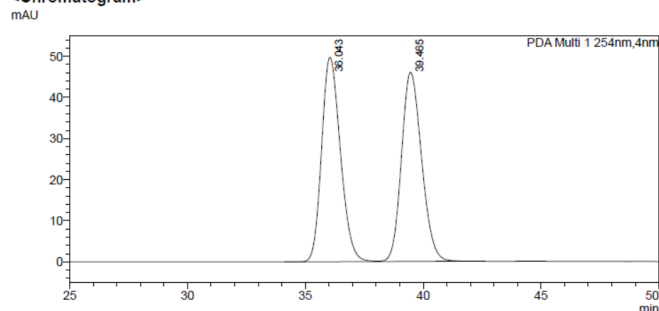

<Peak Table>

| Peak# | Ret. Time | Height | Height% | Area    | Area%   |
|-------|-----------|--------|---------|---------|---------|
| 1     | 36.043    | 49735  | 51.949  | 2752913 | 50.191  |
| 2     | 39.465    | 46003  | 48.051  | 2731976 | 49.809  |
| Total |           | 95737  | 100.000 | 5484888 | 100.000 |

<Chromatogram>

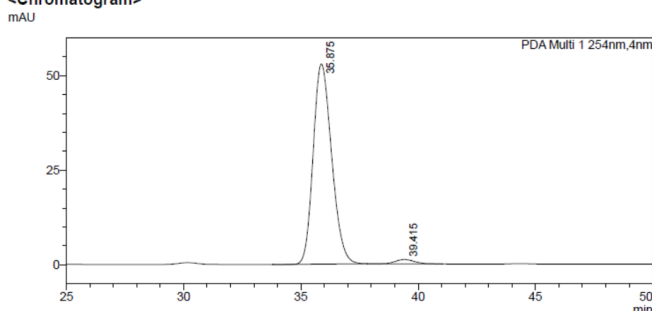

<Peak Table>

| Peak# | Ret. Time | Height | Height% | Area    | Area%   |
|-------|-----------|--------|---------|---------|---------|
| 1     | 35.875    | 53003  | 97.903  | 2905998 | 97.876  |
| 2     | 39.415    | 1135   | 2.097   | 63053   | 2.124   |
| Total |           | 54138  | 100.000 | 2969051 | 100.000 |

### methyl (1*S*,4*R*,4*aR*,9*aR*)-9-tosyl-2,3,4,4*a*,9,9*a*-hexahydro-1*H*-1,4-methanocarbazole-7-carboxylate

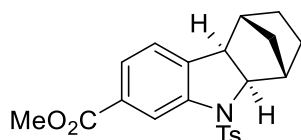

**3i**; white solid (hexane/EtOAc = 4:1, 46 mg, 58% isolated yield); m.p. = 166-167 °C;  $[\alpha]_D^{20} = 296.895$  ( $c = 0.313$ ,  $CHCl_3$ );  $^1H$  NMR (400 MHz,  $CDCl_3$ )  $\delta$  8.20 (d,  $J = 4.0$  Hz, 1H), 7.67 (d,  $J = 8.5$  Hz, 3H), 7.22 (d,  $J = 8.1$  Hz, 2H), 7.08 (d,  $J = 7.8$  Hz, 1H), 4.02 (d,  $J = 8.1$  Hz, 1H), 3.92 (s, 3H), 3.11 (d,  $J = 8.1$  Hz, 1H), 2.77 (s, 1H), 2.36 (s, 3H), 2.27 (s, 1H), 1.63-1.60 (m, 2H), 1.35-1.26 (m, 3H), 1.17 (d,  $J = 10.6$  Hz, 1H).  $^{13}C$  NMR (126 MHz,  $CDCl_3$ )  $\delta$  166.78, 144.02, 143.82, 139.32, 134.77, 130.13, 129.69, 127.10, 125.55, 124.72, 114.80, 70.15, 52.17, 50.39, 43.92, 43.09, 32.31, 28.40, 25.21, 21.49. Enantiomeric excess: 98%, determined by HPLC (Chiralpak IC, hexane/*i*-PrOH = 70/30; flow rate 0.8 ml/min; 25 °C; 254 nm), first peak:  $t_R = 27.3$  min, second peak:  $t_R = 31.6$  min; HRMS (ESI)  $m/z$  calcd. for  $C_{22}H_{23}NNaO_4S$   $[M+Na]^+ = 420.1240$ , found = 420.1236.

<Chromatogram>

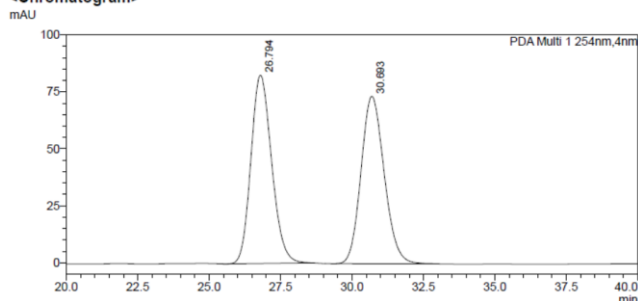

<Peak Table>

| Peak# | Ret. Time | Height | Height% | Area    | Area%   |
|-------|-----------|--------|---------|---------|---------|
| 1     | 26.794    | 82584  | 52.931  | 4165127 | 50.113  |
| 2     | 30.693    | 73438  | 47.069  | 4146387 | 49.887  |
| Total |           | 156023 | 100.000 | 8311514 | 100.000 |

<Chromatogram>

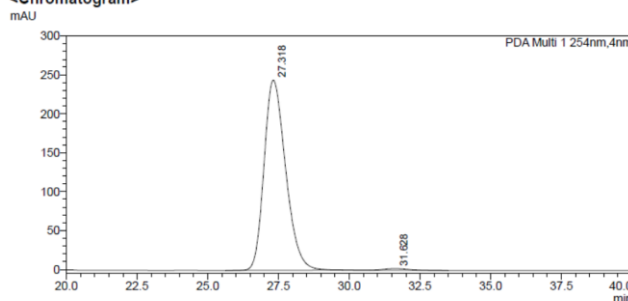

<Peak Table>

| Peak# | Ret. Time | Height | Height% | Area     | Area%   |
|-------|-----------|--------|---------|----------|---------|
| 1     | 27.318    | 244246 | 99.085  | 12971409 | 99.088  |
| 2     | 31.628    | 2256   | 0.915   | 119407   | 0.912   |
| Total |           | 246503 | 100.000 | 13090816 | 100.000 |

## Supporting Information

### (1*S*,4*R*,4*aR*,9*aR*)-9-tosyl-7-(trifluoromethyl)-2,3,4,4*a*,9,9*a*-hexahydro-1*H*-1,4-methanocarbazole

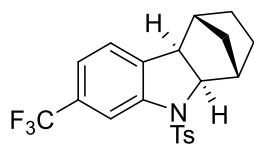

**3m**; white solid (hexane/EtOAc = 8:1, 59 mg, 72% isolated yield); m.p. = 164-165 °C;  $[\alpha]_D^{20} = 166.333$  ( $c = 0.625$ ,  $\text{CHCl}_3$ );  $^1\text{H NMR}$  (400 MHz,  $\text{CDCl}_3$ )  $\delta$  7.82 (s, 1H), 7.66 (d,  $J = 8.2$  Hz, 2H), 7.24-7.20 (m, 3H), 7.11 (d,  $J = 7.8$  Hz, 1H), 4.03 (d,  $J = 8.1$  Hz, 1H), 3.12 (d,  $J = 8.0$  Hz, 1H), 2.78 (s, 1H), 2.37 (s, 3H), 2.27 (s, 1H), 1.63-1.60 (m, 2H), 1.37-1.26 (m, 3H), 1.19 (d,  $J = 10.5$  Hz, 1H).  $^{13}\text{C NMR}$  (101 MHz,  $\text{CDCl}_3$ )  $\delta$  144.27, 143.99, 137.95, 134.54, 130.28 (q,  $J = 32.2$  Hz), 129.78, 127.05, 125.16, 124.01 (q,  $J = 272.3$  Hz), 120.67 (q,  $J = 3.8$  Hz), 110.88 (q,  $J = 3.9$  Hz), 70.23, 50.24, 43.91, 43.11, 32.30, 28.36, 25.19, 21.49.  $^{19}\text{F NMR}$  (376 MHz,  $\text{CDCl}_3$ )  $\delta$  -62.18. Enantiomeric excess: 98%, determined by HPLC (Chiralpak IB, hexane/*i*-PrOH = 97/3; flow rate 0.5 ml/min; 25 °C; 254 nm), first peak:  $t_R = 12.6$  min, second peak:  $t_R = 13.9$  min; HRMS (ESI)  $m/z$  calcd. for  $\text{C}_{21}\text{H}_{20}\text{F}_3\text{NNaO}_2\text{S}$   $[\text{M}+\text{Na}]^+ = 430.1059$ , found = 430.1047.

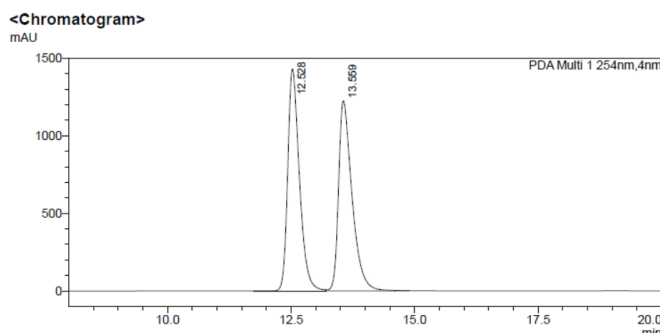

<Peak Table>  
 PDA Ch1 254nm

| Peak# | Ret. Time | Height  | Height% | Area     | Area%   |
|-------|-----------|---------|---------|----------|---------|
| 1     | 12.528    | 1430130 | 53.846  | 23473670 | 50.303  |
| 2     | 13.559    | 1225840 | 46.154  | 23191059 | 49.697  |
| Total |           | 2655969 | 100.000 | 46664729 | 100.000 |

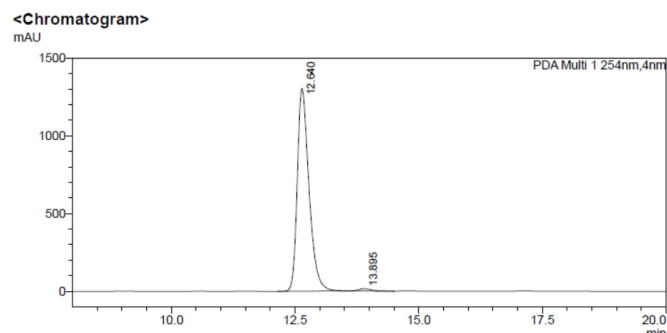

<Peak Table>  
 PDA Ch1 254nm

| Peak# | Ret. Time | Height  | Height% | Area     | Area%   |
|-------|-----------|---------|---------|----------|---------|
| 1     | 12.640    | 1306422 | 98.834  | 21467051 | 98.790  |
| 2     | 13.895    | 15412   | 1.166   | 263041   | 1.210   |
| Total |           | 1321834 | 100.000 | 21730092 | 100.000 |

### (1*S*,4*R*,4*aR*,9*aR*)-5-fluoro-9-tosyl-2,3,4,4*a*,9,9*a*-hexahydro-1*H*-1,4-methanocarbazole

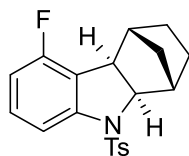

**3n**; white solid (hexane/EtOAc = 8:1, 46 mg, 65% isolated yield); m.p. = 118-120 °C;  $[\alpha]_D^{20} = 6.840$  ( $c = 0.5$ ,  $\text{CHCl}_3$ );  $^1\text{H NMR}$  (400 MHz,  $\text{CDCl}_3$ )  $\delta$  7.66 (d,  $J = 8.2$  Hz, 2H), 7.38 (d,  $J = 8.1$  Hz, 1H), 7.22 (d,  $J = 8.1$  Hz, 2H), 7.11 (td,  $J = 8.2, 6.0$  Hz, 1H), 6.63 (t,  $J = 8.5$  Hz, 1H), 4.00 (d,  $J = 8.1$  Hz, 1H), 3.18 (d,  $J = 8.1$  Hz, 1H), 2.76 (s, 1H), 2.43 (s, 1H), 2.37 (s, 3H), 1.62-1.59 (m, 2H), 1.40 (d,  $J = 10.7$  Hz, 1H), 1.32-1.26 (m, 2H), 1.20 (d,  $J = 10.7$  Hz, 1H).  $^{13}\text{C NMR}$  (126 MHz,  $\text{CDCl}_3$ )  $\delta$  159.17 (d,  $J = 247.0$  Hz), 145.87 (d,  $J = 8.4$  Hz), 144.05, 134.72, 129.67, 129.59 (d,  $J = 8.2$  Hz), 127.08, 120.21 (d,  $J = 21.4$  Hz), 110.44 (d,  $J = 20.2$  Hz), 109.92 (d,  $J = 3.3$  Hz), 70.57, 47.62, 43.88, 40.89, 32.40, 28.29, 25.05, 21.49.  $^{19}\text{F NMR}$

## Supporting Information

(376 MHz, CDCl<sub>3</sub>) δ -118.65. Enantiomeric excess: 89%, determined by HPLC (Chiralpak IB, hexane/*i*-PrOH = 97/3; flow rate 0.5 ml/min; 25 °C; 254 nm), first peak: *t*<sub>R</sub> = 13.7 min, second peak: *t*<sub>R</sub> = 15.1 min; HRMS (ESI) *m/z* calcd. for C<sub>20</sub>H<sub>20</sub>FNNaO<sub>2</sub>S [M+Na]<sup>+</sup> = 380.1091, found = 380.1086.

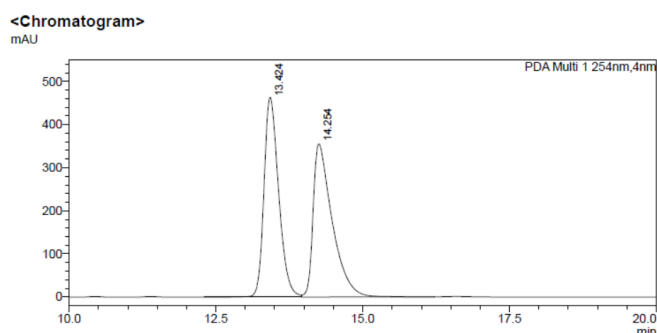

<Peak Table>  
PDA Ch1 254nm

| Peak# | Ret. Time | Height | Height% | Area     | Area%   |
|-------|-----------|--------|---------|----------|---------|
| 1     | 13.424    | 463371 | 56.616  | 8023210  | 50.027  |
| 2     | 14.254    | 355069 | 43.384  | 8014477  | 49.973  |
| Total |           | 818440 | 100.000 | 16037687 | 100.000 |

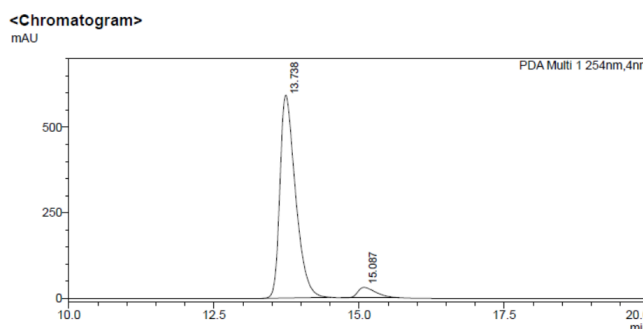

<Peak Table>  
PDA Ch1 254nm

| Peak# | Ret. Time | Height | Height% | Area     | Area%   |
|-------|-----------|--------|---------|----------|---------|
| 1     | 13.738    | 592298 | 95.120  | 11048763 | 94.440  |
| 2     | 15.087    | 30385  | 4.880   | 650449   | 5.560   |
| Total |           | 622683 | 100.000 | 11699212 | 100.000 |

### (1*S*,4*R*,4*aR*,9*aR*)-8-fluoro-9-tosyl-2,3,4,4*a*,9,9*a*-hexahydro-1*H*-1,4-methanocarbazole

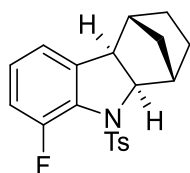

**3o**; white solid (hexane/EtOAc = 8:1, 38 mg, 53% isolated yield); m.p. = 138-139 °C; [ $\alpha$ ]<sub>D</sub><sup>20</sup> = 28.051 (*c* = 0.313, CHCl<sub>3</sub>); <sup>1</sup>H NMR (400 MHz, CDCl<sub>3</sub>) δ 7.73 (d, *J* = 8.1 Hz, 2H), 7.25 (d, *J* = 9.5 Hz, 2H), 6.93-6.88 (m, 1H), 6.85-6.79 (m, 2H), 4.52 (d, *J* = 8.0 Hz, 1H), 3.27 (d, *J* = 8.0 Hz, 1H), 2.70 (s, 1H), 2.39 (s, 3H), 2.25 (s, 1H), 1.62-1.60 (m, 2H), 1.36-1.26 (m, 3H), 1.16 (d, *J* = 10.5 Hz, 1H). <sup>13</sup>C NMR (126 MHz, CDCl<sub>3</sub>) δ 150.19 (d, *J* = 252.0 Hz), 143.51, 138.96 (d, *J* = 2.5 Hz), 136.70 (d, *J* = 1.3 Hz), 130.36 (d, *J* = 8.82 Hz), 129.42, 127.27 (d, *J* = 1.3 Hz), 125.07 (d, *J* = 6.3 Hz), 120.39 (d, *J* = 3.8 Hz), 115.81 (d, *J* = 21.4 Hz), 71.05, 50.77, 43.73, 43.31, 32.24, 28.07, 25.49, 21.51. <sup>19</sup>F NMR (376 MHz, CDCl<sub>3</sub>) δ -119.17. Enantiomeric excess: 84%, determined by HPLC (Chiralpak IF, hexane/*i*-PrOH = 90/10; flow rate 0.8 ml/min; 25 °C; 254 nm), first peak: *t*<sub>R</sub> = 19.3 min, second peak: *t*<sub>R</sub> = 20.5 min; HRMS (ESI) *m/z* calcd. For C<sub>20</sub>H<sub>20</sub>FNNaO<sub>2</sub>S [M+Na]<sup>+</sup> = 380.1091, found = 380.1086.

## Supporting Information

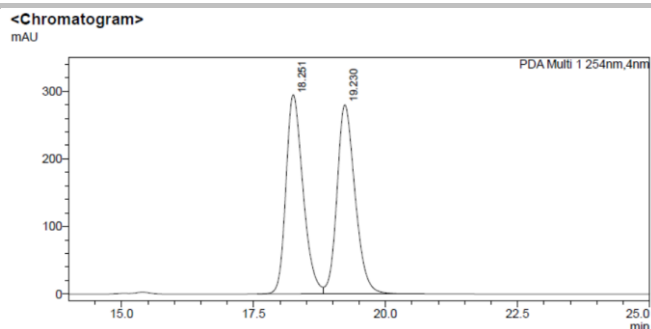

<Peak Table>

| Peak# | Ret. Time | Height | Height% | Area     | Area%   |
|-------|-----------|--------|---------|----------|---------|
| 1     | 18.251    | 294897 | 51.321  | 6629511  | 49.858  |
| 2     | 19.230    | 279721 | 48.679  | 6667317  | 50.142  |
| Total |           | 574617 | 100.000 | 13296829 | 100.000 |

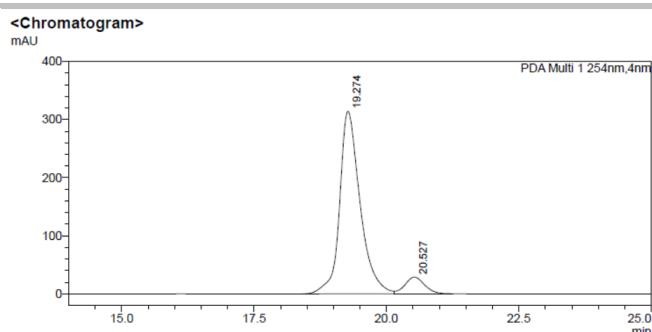

<Peak Table>

| Peak# | Ret. Time | Height | Height% | Area    | Area%   |
|-------|-----------|--------|---------|---------|---------|
| 1     | 19.274    | 314351 | 91.612  | 8472649 | 91.950  |
| 2     | 20.627    | 28781  | 8.388   | 741782  | 8.050   |
| Total |           | 343132 | 100.000 | 9214432 | 100.000 |

### (1*S*,4*R*,4*aR*,9*aR*)-6,7-difluoro-9-tosyl-2,3,4,4*a*,9,9*a*-hexahydro-1*H*-1,4-methanocarbazole

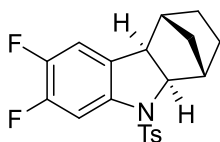

**3p**; white solid (hexane/EtOAc = 8:1, 70 mg, 93% isolated yield); m.p. = 144-145 °C;  $[\alpha]_D^{20} = 93.154$  ( $c = 0.583$ ,  $\text{CHCl}_3$ );  $^1\text{H NMR}$  (400 MHz,  $\text{CDCl}_3$ )  $\delta$  7.64 (d,  $J = 8.3$  Hz, 2H), 7.46 (dd,  $J = 11.4, 6.9$  Hz, 1H), 7.25 (d,  $J = 8.1$  Hz, 2H), 6.80 (t,  $J = 8$  Hz, 1H), 3.95 (d,  $J = 8.1$  Hz, 1H), 3.02 (d,  $J = 8.1$  Hz, 1H), 2.73 (s, 1H), 2.38 (s, 3H), 2.20 (s, 1H), 1.59 (d,  $J = 8.2$  Hz, 2H), 1.37-1.33 (m, 1H), 1.28-1.24 (m, 2H), 1.18 (d,  $J = 10.7$  Hz, 1H).  $^{13}\text{C NMR}$  (126 MHz,  $\text{CDCl}_3$ )  $\delta$  149.36 (dd,  $J = 13.9, 323.8$  Hz), 147.42 (dd,  $J = 13.9, 322.6$  Hz), 144.24, 139.42 (dd,  $J = 9.4, 2.2$  Hz), 134.38, 129.78, 129.63 (dd,  $J = 5.8, 3.2$  Hz), 127.12, 113.17 (d,  $J = 19.0$  Hz), 103.98 (d,  $J = 23.6$  Hz), 70.50, 50.06, 43.91, 42.96, 32.23, 28.15, 25.13, 21.51.  $^{19}\text{F NMR}$  (376 MHz,  $\text{CDCl}_3$ )  $\delta$  -137.15 (d,  $J = 20.6$  Hz), -143.40 (d,  $J = 20.6$  Hz). Enantiomeric excess: 98%, determined by HPLC (Chiralpak IB, hexane/*i*-PrOH = 97/3; flow rate 0.5 ml/min; 25 °C; 254 nm), first peak:  $t_R = 14.4$  min, second peak:  $t_R = 16.0$  min; HRMS (ESI)  $m/z$  calcd. For  $\text{C}_{20}\text{H}_{19}\text{F}_2\text{NNaO}_2\text{S}$   $[\text{M}+\text{Na}]^+ = 398.0997$ , found = 398.0990.

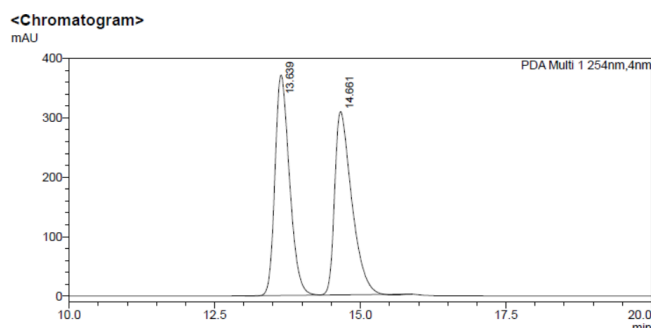

<Peak Table>

| Peak# | Ret. Time | Height | Height% | Area     | Area%   |
|-------|-----------|--------|---------|----------|---------|
| 1     | 13.639    | 371085 | 54.597  | 6441584  | 50.518  |
| 2     | 14.661    | 308592 | 45.403  | 6309566  | 49.482  |
| Total |           | 679677 | 100.000 | 12751150 | 100.000 |

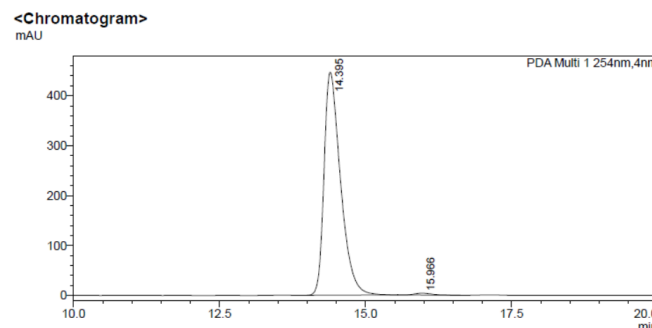

<Peak Table>

| Peak# | Ret. Time | Height | Height% | Area    | Area%   |
|-------|-----------|--------|---------|---------|---------|
| 1     | 14.395    | 446814 | 99.184  | 8783804 | 99.134  |
| 2     | 15.966    | 3678   | 0.816   | 76754   | 0.866   |
| Total |           | 450492 | 100.000 | 8860557 | 100.000 |

## Supporting Information

### (1*S*,4*R*,4*aR*,9*aR*)-9-(phenylsulfonyl)-2,3,4,4*a*,9,9*a*-hexahydro-1*H*-1,4-methanocarbazole

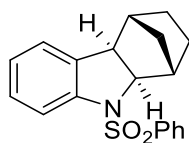

**3q**; white solid (hexane/EtOAc = 8:1, 50 mg, 77% isolated yield); m.p. = 115-117 °C;  $[\alpha]_D^{20} = 162.429$  ( $c = 0.625$ , CHCl<sub>3</sub>); <sup>1</sup>H NMR (400 MHz, CDCl<sub>3</sub>)  $\delta$  7.79-7.76 (m, 2H), 7.60 (d,  $J = 8.1$  Hz, 1H), 7.51 (dt,  $J = 14.9, 1.2$  Hz, 1H), 7.41 (t,  $J = 7.7$  Hz, 2H), 7.16-7.12 (m, 1H), 7.03 (d,  $J = 7.4$  Hz, 1H), 6.95 (td,  $J = 7.4, 0.9$  Hz, 1H), 3.97 (d,  $J = 8.1$  Hz, 1H), 3.08 (d,  $J = 8.1$  Hz, 1H), 2.75 (s, 1H), 2.24 (s, 1H), 1.61-1.58 (m, 2H), 1.37-1.34 (m, 1H), 1.30-1.27 (m, 2H), 1.16-1.12 (m, 1H). <sup>13</sup>C NMR (101 MHz, CDCl<sub>3</sub>)  $\delta$  143.24, 137.86, 133.95, 132.92, 128.94, 127.77, 127.02, 124.89, 123.75, 114.11, 69.80, 50.40, 43.88, 43.03, 32.20, 28.29, 25.29. Enantiomeric excess: 96%, determined by HPLC (Chiralpak IC, hexane/*i*-PrOH = 93/7; flow rate 0.8 ml/min; 25 °C; 254 nm), first peak:  $t_R = 16.5$  min, second peak:  $t_R = 17.5$  min; HRMS (ESI)  $m/z$  calcd. For C<sub>19</sub>H<sub>19</sub>NNaO<sub>2</sub>S [M+Na]<sup>+</sup> = 348.1029, found = 348.1026.

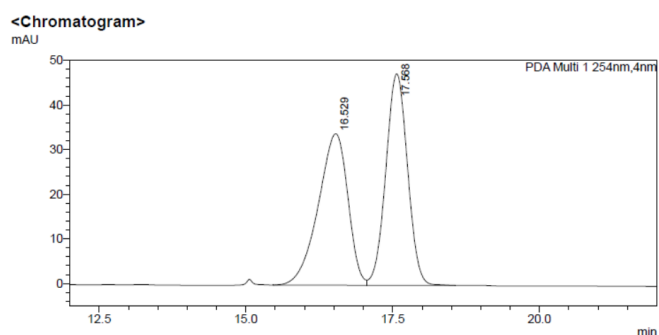

<Peak Table>  
PDA Ch1 254nm

| Peak# | Ret. Time | Height | Height% | Area    | Area%   |
|-------|-----------|--------|---------|---------|---------|
| 1     | 16.529    | 33925  | 41.725  | 1190992 | 49.414  |
| 2     | 17.568    | 47381  | 58.275  | 1219258 | 50.586  |
| Total |           | 81306  | 100.000 | 2410249 | 100.000 |

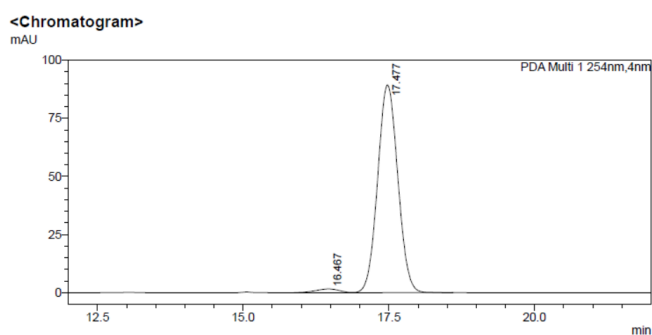

<Peak Table>  
PDA Ch1 254nm

| Peak# | Ret. Time | Height | Height% | Area    | Area%   |
|-------|-----------|--------|---------|---------|---------|
| 1     | 16.467    | 1659   | 1.823   | 48009   | 2.178   |
| 2     | 17.477    | 89383  | 98.177  | 2155805 | 97.822  |
| Total |           | 91043  | 100.000 | 2203814 | 100.000 |

### (1*S*,4*R*,4*aR*,9*aR*)-9-(methylsulfonyl)-2,3,4,4*a*,9,9*a*-hexahydro-1*H*-1,4-methanocarbazole

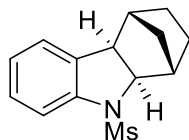

**3r**; white solid (hexane/EtOAc = 8:1, 43 mg, 82% isolated yield); m.p. = 59-60 °C;  $[\alpha]_D^{20} = 28.219$  ( $c = 0.5$ , CHCl<sub>3</sub>); <sup>1</sup>H NMR (400 MHz, CDCl<sub>3</sub>)  $\delta$  7.36 (d,  $J = 8.7$  Hz, 1H), 7.17-7.14 (m, 2H), 7.03-6.99 (m, 1H), 4.08 (d,  $J = 8.1$  Hz, 1H), 3.34 (d,  $J = 8.1$  Hz, 1H), 2.85 (s, 3H), 2.67 (d,  $J = 2.2$  Hz, 1H), 2.33 (s, 1H), 1.66-1.56 (m, 2H), 1.37-1.36 (m, 2H), 1.30-1.26 (m, 1H), 1.17 (d,  $J = 10.6$  Hz, 1H). <sup>13</sup>C NMR (101 MHz, CDCl<sub>3</sub>)  $\delta$  143.15, 133.74, 128.04, 125.17, 123.76, 113.16, 70.20, 50.52, 43.69, 43.18, 35.57, 31.97, 28.35, 25.11. Enantiomeric excess: 95%, determined by HPLC (Chiralpak IF, hexane/*i*-PrOH = 92/8; flow rate

## Supporting Information

0.5 ml/min; 25 °C; 254 nm), first peak:  $t_R = 20.9$  min, second peak:  $t_R = 21.7$  min; HRMS (ESI)  $m/z$  calcd. For  $C_{14}H_{17}NNaO_2S$   $[M+Na]^+ = 286.0872$ , found = 286.0868.

<Chromatogram>

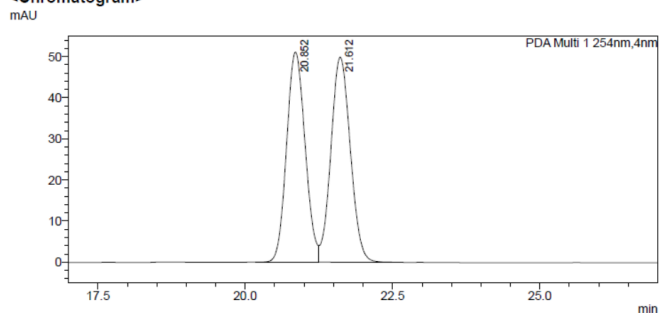

<Peak Table>

| Peak# | Ret. Time | Height | Height% | Area    | Area%   |
|-------|-----------|--------|---------|---------|---------|
| 1     | 20.852    | 51123  | 50.602  | 1119728 | 49.463  |
| 2     | 21.612    | 49906  | 49.398  | 1144021 | 50.537  |
| Total |           | 101029 | 100.000 | 2263749 | 100.000 |

<Chromatogram>

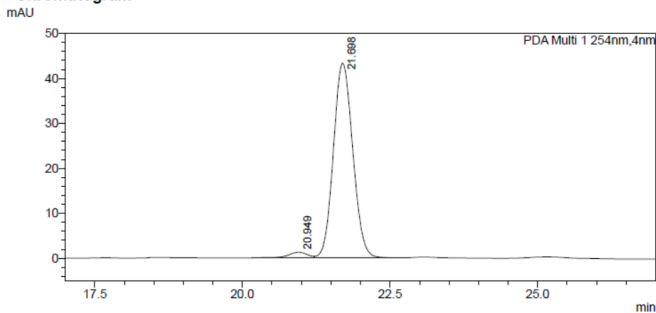

<Peak Table>

| Peak# | Ret. Time | Height | Height% | Area    | Area%   |
|-------|-----------|--------|---------|---------|---------|
| 1     | 20.949    | 1213   | 2.726   | 26097   | 2.578   |
| 2     | 21.698    | 43259  | 97.274  | 986315  | 97.422  |
| Total |           | 44472  | 100.000 | 1012413 | 100.000 |

### (1*S*,4*R*,4*aR*,9*aR*)-9-((4-nitrophenyl)sulfonyl)-2,3,4,4*a*,9,9*a*-hexahydro-1*H*-1,4-methanocarbazole

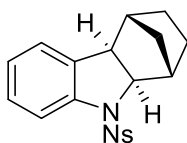

**3s**; white solid (hexane/EtOAc = 5:1, 40 mg, 54% isolated yield); m.p. = 189-191 °C;  $[\alpha]_D^{20} = 192.648$  ( $c = 0.313$ ,  $CHCl_3$ );  $^1H$  NMR (400 MHz,  $CDCl_3$ )  $\delta$  8.27-8.24 (m, 2H), 7.98-7.94 (m, 2H), 7.60 (d,  $J = 8.2$  Hz, 1H), 7.20-7.16 (m, 1H), 7.06 (d,  $J = 7.4$  Hz, 1H), 7.01 (td,  $J = 7.4, 0.9$  Hz, 1H), 3.95 (d,  $J = 8.0$  Hz, 1H), 3.11 (d,  $J = 8.0$  Hz, 1H), 2.75 (d,  $J = 2.5$  Hz, 1H), 2.27 (s, 1H), 1.63-1.59 (m, 2H), 1.35-1.26 (m, 3H), 1.17 (dd,  $J = 10.5, 1.3$  Hz, 1H).  $^{13}C$  NMR (101 MHz,  $CDCl_3$ )  $\delta$  150.21, 143.30, 142.37, 134.02, 128.21, 128.06, 125.25, 124.55, 124.21, 114.01, 70.09, 50.39, 43.92, 43.01, 32.15, 28.19, 25.26. Enantiomeric excess: 97%, determined by HPLC (Chiralpak IC, hexane/*i*-PrOH = 93/7; flow rate 0.8 ml/min; 25 °C; 254 nm), first peak:  $t_R = 20.9$  min, second peak:  $t_R = 21.7$  min; HRMS (ESI)  $m/z$  calcd. For  $C_{19}H_{18}N_2NaO_4S$   $[M+Na]^+ = 393.0879$ , found = 393.0885.

<Chromatogram>

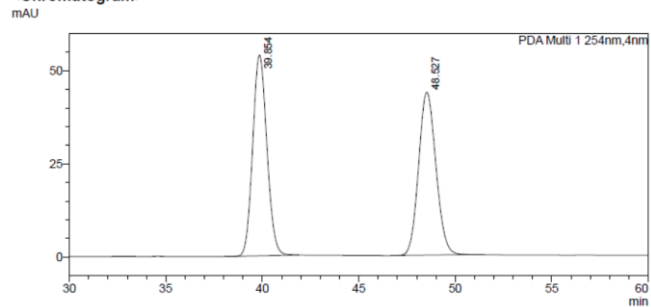

<Peak Table>

| Peak# | Ret. Time | Height | Height% | Area    | Area%   |
|-------|-----------|--------|---------|---------|---------|
| 1     | 39.854    | 53947  | 55.199  | 2766414 | 50.221  |
| 2     | 48.527    | 43785  | 44.801  | 2742113 | 49.779  |
| Total |           | 97732  | 100.000 | 5508527 | 100.000 |

<Chromatogram>

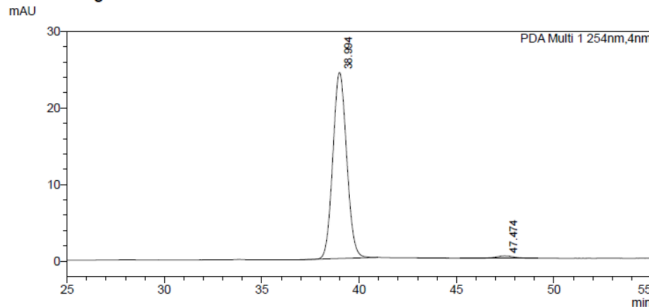

<Peak Table>

| Peak# | Ret. Time | Height | Height% | Area    | Area%   |
|-------|-----------|--------|---------|---------|---------|
| 1     | 38.984    | 24322  | 98.743  | 1201656 | 98.494  |
| 2     | 47.474    | 310    | 1.257   | 18372   | 1.506   |
| Total |           | 24631  | 100.000 | 1220028 | 100.000 |

## Supporting Information

### (1*S*,4*R*,4*aR*,9*aR*)-2,3,4,4*a*,9,9*a*-hexahydro-1*H*-1,4-methanocarbazole

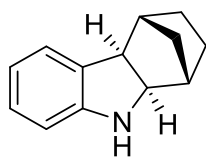

**3t**; brown solid (hexane/EtOAc = 20:1, 20 mg, 63% isolated yield);  $[\alpha]_D^{20} = -7.0841$  ( $c = 0.95$ ,  $\text{CH}_2\text{Cl}_2$ );  $^1\text{H}$  NMR (500 MHz,  $\text{C}_6\text{D}_6$ )  $\delta$  7.00 (t,  $J = 7.6$  Hz, 1H), 6.97 (d,  $J = 7.3$  Hz, 1H), 6.70 (td,  $J = 7.3, 0.5$  Hz, 1H), 6.35 (d,  $J = 7.8$  Hz, 1H), 3.38 (d,  $J = 8.2$  Hz, 1H), 3.04 (d,  $J = 8.2$  Hz, 1H), 2.89 (s, 1H), 2.12 (d,  $J = 3.5$  Hz, 1H), 1.87 (d,  $J = 4.2$  Hz, 1H), 1.56 (d,  $J = 10.1$  Hz, 1H), 1.37-1.24 (m, 2H), 1.11-1.06 (m, 1H), 0.95-0.90 (m, 2H);  $^{13}\text{C}$  NMR (126 MHz,  $\text{C}_6\text{D}_6$ )  $\delta$  153.13, 131.70, 124.77, 118.08, 108.16, 65.52, 52.61, 44.58, 43.51, 32.43, 28.86, 25.54. Enantiomeric excess: 95%, determined by HPLC (Chiralpak IC, hexane/*i*-PrOH = 97/3; flow rate 0.5 ml/min; 25 °C; 254 nm), first peak:  $t_R = 10.4$  min, second peak:  $t_R = 11.6$  min; HRMS (ESI)  $m/z$  calcd. For  $\text{C}_{13}\text{H}_{16}\text{N}$   $[\text{M}+\text{H}]^+ = 186.1277$ , found = 186.1272.

<Chromatogram>

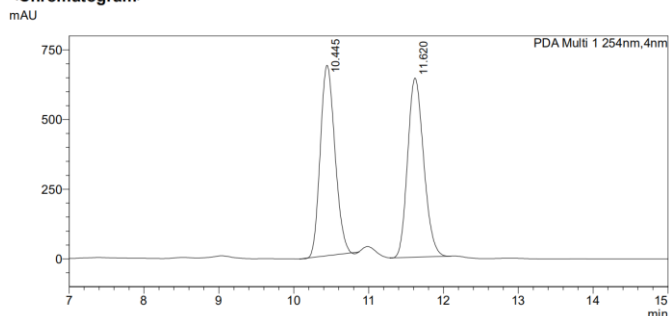

<Peak Table>

| Peak# | Ret. Time | Height  | Height% | Area     | Area%   |
|-------|-----------|---------|---------|----------|---------|
| 1     | 10.445    | 683528  | 51.546  | 9313181  | 49.275  |
| 2     | 11.620    | 642516  | 48.454  | 9587299  | 50.725  |
| Total |           | 1326044 | 100.000 | 18900481 | 100.000 |

<Chromatogram>

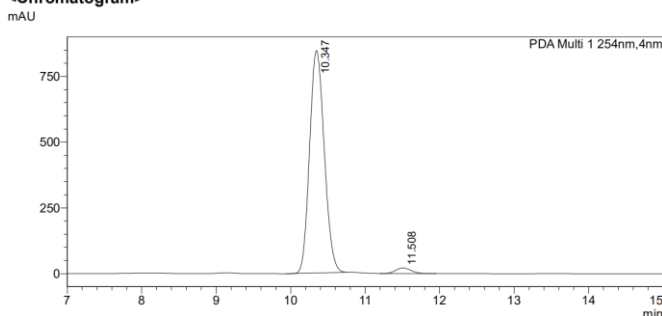

<Peak Table>

| Peak# | Ret. Time | Height | Height% | Area     | Area%   |
|-------|-----------|--------|---------|----------|---------|
| 1     | 10.347    | 845902 | 97.545  | 11594081 | 97.404  |
| 2     | 11.508    | 21287  | 2.455   | 308980   | 2.596   |
| Total |           | 867188 | 100.000 | 11903061 | 100.000 |

### (1*S*,4*R*,4*aR*,9*aR*)-9-methyl-2,3,4,4*a*,9,9*a*-hexahydro-1*H*-1,4-methanocarbazole

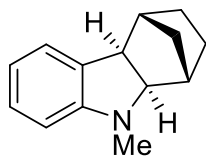

**3u**; brown oil (hexane/EtOAc = 50:1, 38 mg, 85% isolated yield);  $[\alpha]_D^{20} = -169.7366$  ( $c = 0.5$ ,  $\text{CH}_2\text{Cl}_2$ );  $^1\text{H}$  NMR (500 MHz,  $\text{C}_6\text{D}_6$ )  $\delta$  7.09 (t,  $J = 7.7$  Hz, 1H), 6.97 (d,  $J = 7.2$  Hz, 1H), 6.70-6.66 (m, 1H), 6.20 (d,  $J = 7.8$  Hz, 1H), 3.17 (d,  $J = 8.3$  Hz, 1H), 3.02 (d,  $J = 8.3$  Hz, 1H), 2.44 (s, 3H), 2.15 (s, 1H), 2.10 (d,  $J = 3.0$  Hz, 1H), 1.56-1.54 (m, 1H), 1.34-1.27 (m, 2H), 1.10-1.06 (m, 1H), 0.94-0.88 (m, 2H);  $^{13}\text{C}$  NMR (126 MHz,  $\text{C}_6\text{D}_6$ )  $\delta$  154.21, 131.79, 124.46, 116.66, 104.79, 73.01, 51.18, 43.47, 40.85, 32.74, 29.01, 25.22; Enantiomeric excess: 94%, determined by HPLC (Chiralpak IF, hexane/*i*-PrOH = 100/0; flow rate 0.8 ml/min; 25 °C; 254 nm), first peak:  $t_R = 9.1$  min, second peak:  $t_R = 9.8$  min; HRMS (ESI)  $m/z$  calcd. For  $\text{C}_{14}\text{H}_{18}\text{N}$   $[\text{M}+\text{H}]^+ = 200.1434$ , found = 200.1430.



## Supporting Information

<Chromatogram>

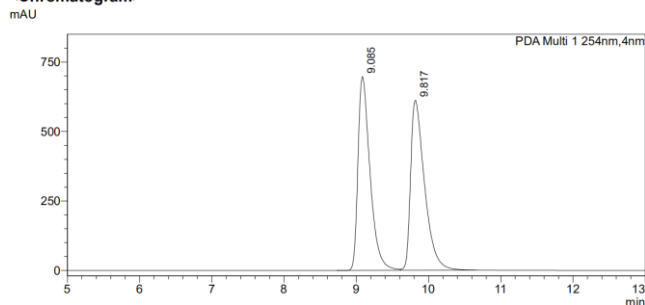

<Peak Table>

| Peak# | Ret. Time | Height  | Height% | Area     | Area%   |
|-------|-----------|---------|---------|----------|---------|
| 1     | 9.085     | 698065  | 53.272  | 8099540  | 49.622  |
| 2     | 9.817     | 612319  | 46.728  | 8222798  | 50.378  |
| Total |           | 1310383 | 100.000 | 16322339 | 100.000 |

<Chromatogram>

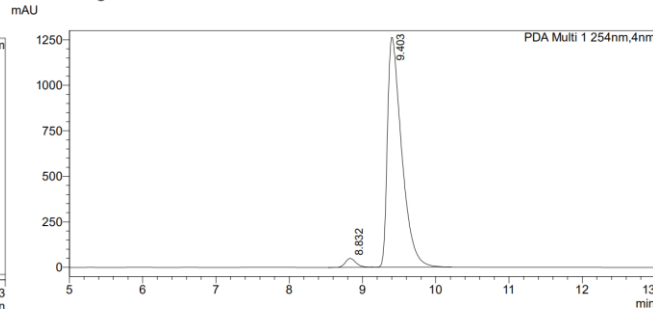

<Peak Table>

| Peak# | Ret. Time | Height  | Height% | Area     | Area%   |
|-------|-----------|---------|---------|----------|---------|
| 1     | 8.832     | 49247   | 3.757   | 495371   | 2.822   |
| 2     | 9.403     | 1261633 | 96.243  | 17057242 | 97.178  |
| Total |           | 1310880 | 100.000 | 17552613 | 100.000 |

### (1*R*,4*S*,4*aR*,9*bR*)-1,2,3,4,4*a*,9*b*-hexahydro-1,4-methanodibenzo[*b,d*]furan

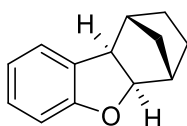

**5a**; pale yellow oil (hexane/Et<sub>2</sub>O = 20:1, 39 mg, 70% isolated yield);  $[\alpha]_D^{20} = 25.120$  ( $c = 0.5$ , CHCl<sub>3</sub>); <sup>1</sup>H NMR (500 MHz, CDCl<sub>3</sub>)  $\delta$  7.11 (d,  $J = 7.3$  Hz, 1H), 7.08-7.04 (m, 1H), 6.80 (td,  $J = 7.4, 0.7$  Hz, 1H), 6.70 (d,  $J = 8.0$  Hz, 1H), 4.68 (d,  $J = 7.2$  Hz, 1H), 3.27 (d,  $J = 7.2$  Hz, 1H), 2.53 (d,  $J = 3.1$  Hz, 1H), 2.33 (s, 1H), 1.59-1.53 (m, 2H), 1.46-1.43 (m, 1H), 1.34-1.30 (m, 1H), 1.19-1.13 (m, 2H). <sup>13</sup>C NMR (126 MHz, CDCl<sub>3</sub>)  $\delta$  161.33, 129.61, 128.00, 124.70, 120.03, 108.44, 89.21, 51.61, 42.56, 42.24, 32.07, 27.89, 23.50. Enantiomeric excess: 95%, determined by HPLC (Chiralpak IB, hexane/*i*-PrOH = 100/0; flow rate 0.5 ml/min; 25 °C; 210 nm), first peak:  $t_R = 14.5$  min, second peak:  $t_R = 15.1$  min; HRMS (ESI)  $m/z$  calcd. For C<sub>13</sub>H<sub>14</sub>NaO  $[M+Na]^+ = 209.0937$ , found = 209.0925.

<Chromatogram>

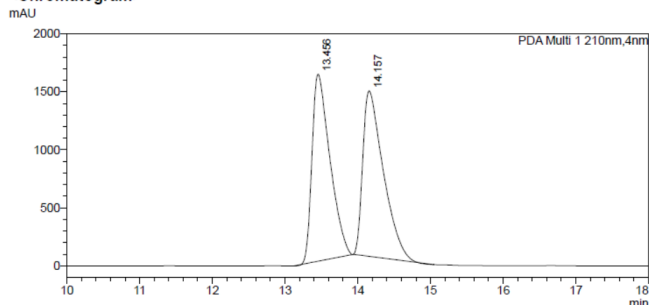

<Peak Table>

| Peak# | Ret. Time | Height  | Height% | Area     | Area%   |
|-------|-----------|---------|---------|----------|---------|
| 1     | 13.456    | 1611797 | 53.033  | 27600885 | 49.543  |
| 2     | 14.157    | 1427465 | 46.967  | 28109978 | 50.457  |
| Total |           | 3039262 | 100.000 | 55710863 | 100.000 |

<Chromatogram>

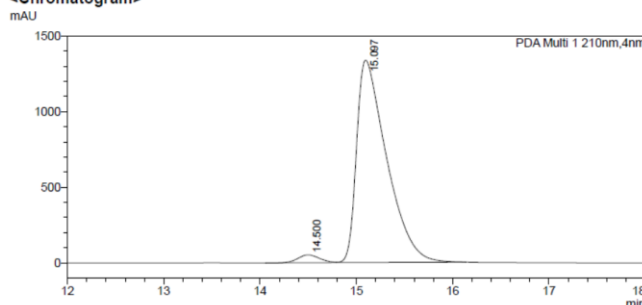

<Peak Table>

| Peak# | Ret. Time | Height  | Height% | Area     | Area%   |
|-------|-----------|---------|---------|----------|---------|
| 1     | 14.500    | 52197   | 3.752   | 824393   | 2.780   |
| 2     | 15.097    | 1338950 | 96.248  | 29045924 | 97.240  |
| Total |           | 1391147 | 100.000 | 29870317 | 100.000 |

### (1*R*,4*S*,4*aR*,9*bR*)-8-fluoro-1,2,3,4,4*a*,9*b*-hexahydro-1,4-methanodibenzo[*b,d*]furan

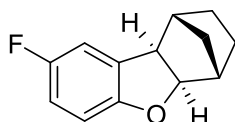

## Supporting Information

**5b**; pale yellow oil (hexane/Et<sub>2</sub>O = 20:1, 31 mg, 51% isolated yield);  $[\alpha]_D^{20} = 30.649$  ( $c = 0.4$ , CHCl<sub>3</sub>); <sup>1</sup>H NMR (400 MHz, CDCl<sub>3</sub>) δ 6.80 (dd,  $J = 8.0, 2.4$  Hz, 1H), 6.73 (td,  $J = 8.8, 2.7$  Hz, 1H), 6.57 (dd,  $J = 8.7, 4.1$  Hz, 1H), 4.69 (d,  $J = 7.3$  Hz, 1H), 3.25 (d,  $J = 7.3$  Hz, 1H), 2.51 (d,  $J = 2.3$  Hz, 1H), 2.28 (s, 1H), 1.61-1.51 (m, 2H), 1.46-1.43 (m, 1H), 1.33-1.26 (m, 1H), 1.18-1.13 (m, 2H). <sup>13</sup>C NMR (101 MHz, CDCl<sub>3</sub>) δ 157.30 (d,  $J = 1.3$  Hz), 157.20 (d,  $J = 236.2$  Hz), 130.91 (d,  $J = 8.3$  Hz), 113.99 (d,  $J = 24.1$  Hz), 111.63 (d,  $J = 24.3$  Hz), 108.33 (d,  $J = 8.5$  Hz), 89.92, 51.85, 42.45, 42.30, 32.07, 27.80, 23.36. <sup>19</sup>F NMR (376 MHz, CDCl<sub>3</sub>) δ -125.25. Enantiomeric excess: 91%, determined by HPLC (Chiralpak IB, hexane/*i*-PrOH = 100/0; flow rate 0.5 ml/min; 25 °C; 210 nm), first peak:  $t_R = 15.1$  min, second peak:  $t_R = 16.5$  min; HRMS (ESI)  $m/z$  calcd. For C<sub>13</sub>H<sub>13</sub>FNao [M+Na]<sup>+</sup> = 227.0843, found = 227.0839.

<Chromatogram>  
mAU

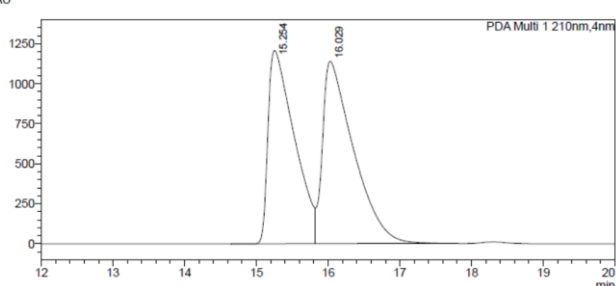

<Peak Table>

| Peak# | Ret. Time | Height  | Height% | Area     | Area%   |
|-------|-----------|---------|---------|----------|---------|
| 1     | 15.254    | 1208275 | 51.473  | 30700528 | 47.235  |
| 2     | 16.029    | 1139132 | 48.527  | 34294798 | 52.765  |
| Total |           | 2347407 | 100.000 | 64995326 | 100.000 |

<Chromatogram>

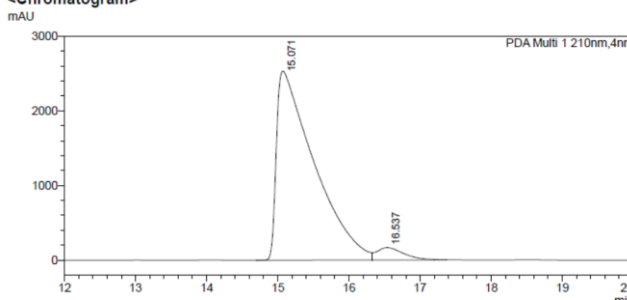

<Peak Table>

| Peak# | Ret. Time | Height  | Height% | Area     | Area%   |
|-------|-----------|---------|---------|----------|---------|
| 1     | 15.071    | 2535800 | 93.858  | 93152861 | 95.585  |
| 2     | 16.537    | 165928  | 6.142   | 4302529  | 4.415   |
| Total |           | 2701729 | 100.000 | 97455390 | 100.000 |

### (1*R*,4*S*,4*aR*,9*bR*)-8-methyl-1,2,3,4,4*a*,9*b*-hexahydro-1,4-methanodibenzo[*b,d*]furan

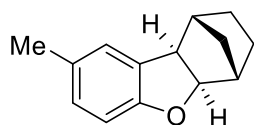

**5c**; amorphous solid (hexane/Et<sub>2</sub>O = 20:1, 39 mg, 65% isolated yield);  $[\alpha]_D^{20} = 48.527$  ( $c = 0.625$ , CHCl<sub>3</sub>); <sup>1</sup>H NMR (500 MHz, CDCl<sub>3</sub>) δ 6.92 (s, 1H), 6.86 (dd,  $J = 8.1, 0.6$  Hz, 1H), 6.58 (d,  $J = 8.1$  Hz, 1H), 4.66 (d,  $J = 7.2$  Hz, 1H), 3.23 (d,  $J = 7.2$  Hz, 1H), 2.51 (d,  $J = 2.9$  Hz, 1H), 2.28 (s, 1H), 2.26 (s, 3H), 1.57-1.54 (m, 2H), 1.46-1.44 (m, 1H), 1.33-1.29 (m, 1H), 1.18-1.12 (m, 2H). <sup>13</sup>C NMR (126 MHz, CDCl<sub>3</sub>) δ 159.24, 129.59, 129.23, 128.34, 125.30, 107.92, 89.29, 51.69, 42.52, 42.27, 32.09, 27.90, 23.48, 20.71. Enantiomeric excess: 94%, determined by HPLC (Chiralpak IB, hexane/*i*-PrOH = 100/0; flow rate 0.5 ml/min; 25 °C; 220 nm), first peak:  $t_R = 15.6$  min, second peak:  $t_R = 18.9$  min; HRMS (ESI)  $m/z$  calcd. For C<sub>14</sub>H<sub>16</sub>NaO [M+Na]<sup>+</sup> = 223.1093, found = 223.1091.

## Supporting Information

<Chromatogram>

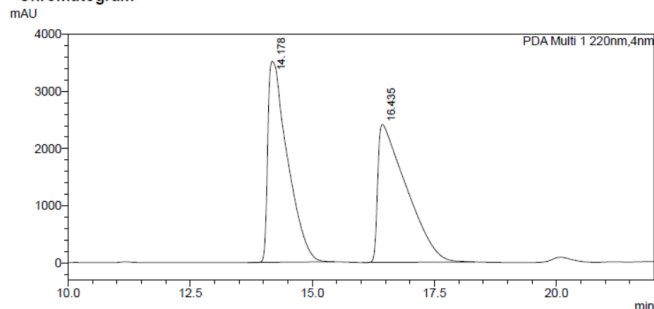

<Peak Table>

| Peak# | Ret. Time | Area      | Height  | Conc. | Unit | Mark | Name |
|-------|-----------|-----------|---------|-------|------|------|------|
| 1     | 14.178    | 98362615  | 3514636 | 0.000 |      | M    |      |
| 2     | 16.435    | 98600409  | 2413513 | 0.000 |      | M    |      |
| Total |           | 196963024 | 5928149 |       |      |      |      |

<Chromatogram>

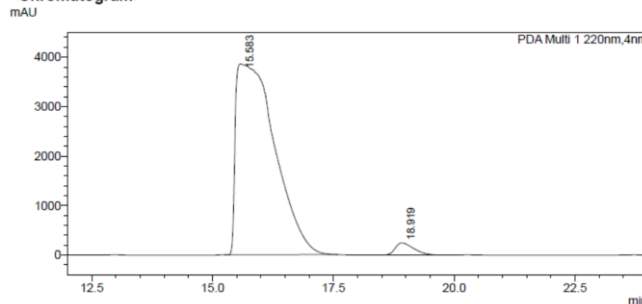

<Peak Table>

| Peak# | Ret. Time | Height  | Height% | Area      | Area%   |
|-------|-----------|---------|---------|-----------|---------|
| 1     | 15.583    | 3855261 | 94.004  | 217667587 | 97.051  |
| 2     | 18.919    | 245920  | 5.996   | 6613698   | 2.949   |
| Total |           | 4101181 | 100.000 | 224281285 | 100.000 |

### (1*R*,4*S*,4*aR*,9*bR*)-8-methoxy-1,2,3,4,4*a*,9*b*-hexahydro-1,4-methanodibenzo[*b,d*]furan

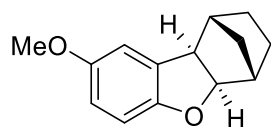

**5d**; amorphous solid (hexane/Et<sub>2</sub>O = 10:1, 40 mg, 61% isolated yield);  $[\alpha]_D^{20} = 49.599$  ( $c = 0.5$ , CHCl<sub>3</sub>); <sup>1</sup>H NMR (500 MHz, CDCl<sub>3</sub>)  $\delta$  6.71-6.70 (m, 1H), 6.62-6.58 (m, 2H), 4.66 (d,  $J = 7.2$  Hz, 1H), 3.75 (s, 3H), 3.25 (d,  $J = 7.2$  Hz, 1H), 2.51 (s, 1H), 2.30 (s, 1H), 1.57-1.52 (m, 2H), 1.48-1.45 (m, 1H), 1.33-1.26 (m, 1H), 1.17-1.14 (m, 2H). <sup>13</sup>C NMR (126 MHz, CDCl<sub>3</sub>)  $\delta$  155.49, 153.78, 130.55, 112.78, 110.99, 108.16, 89.50, 55.97, 52.09, 42.43, 42.32, 32.11, 27.87, 23.42. Enantiomeric excess: 92%, determined by HPLC (Chiralpak IB, hexane/*i*-PrOH = 99/1; flow rate 0.5 ml/min; 25 °C; 220 nm), first peak:  $t_R = 10.5$  min, second peak:  $t_R = 14.0$  min; HRMS (ESI)  $m/z$  calcd. For C<sub>14</sub>H<sub>16</sub>NaO<sub>2</sub> [M+Na]<sup>+</sup> = 239.1043, found = 239.1040.

<Chromatogram>

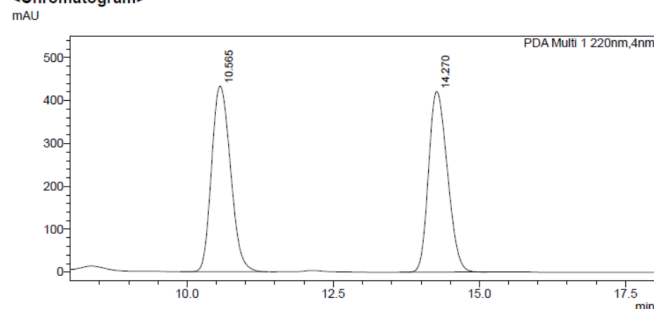

<Peak Table>

| Peak# | Ret. Time | Height | Height% | Area     | Area%   |
|-------|-----------|--------|---------|----------|---------|
| 1     | 10.565    | 432942 | 50.686  | 9784679  | 50.842  |
| 2     | 14.270    | 421221 | 49.314  | 9460641  | 49.158  |
| Total |           | 854162 | 100.000 | 19245320 | 100.000 |

<Chromatogram>

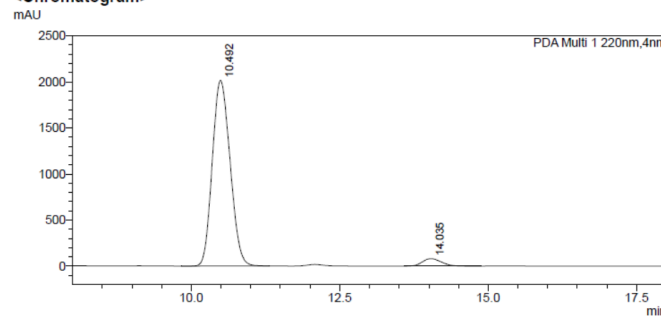

<Peak Table>

| Peak# | Ret. Time | Height  | Height% | Area     | Area%   |
|-------|-----------|---------|---------|----------|---------|
| 1     | 10.492    | 2014582 | 96.201  | 41942531 | 96.010  |
| 2     | 14.035    | 79559   | 3.799   | 1742864  | 3.990   |
| Total |           | 2094140 | 100.000 | 43685394 | 100.000 |

### methyl (1*R*,4*S*,4*aR*,9*bR*)-1,2,3,4,4*a*,9*b*-hexahydro-1,4-methanodibenzo[*b,d*]furan-7-carboxylate

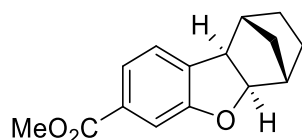

## Supporting Information

**5e**; white solid (hexane/Et<sub>2</sub>O = 10:1, 32 mg, 44% isolated yield); m.p. = 132-133 °C;  $[\alpha]_D^{20} = 67.582$  ( $c = 0.4$ , CHCl<sub>3</sub>); <sup>1</sup>H NMR (500 MHz, CDCl<sub>3</sub>) δ 7.52 (dd,  $J = 7.7, 1.4$  Hz, 1H), 7.31 (d,  $J = 1.2$  Hz, 1H), 7.14 (d,  $J = 7.7$  Hz, 1H), 4.73 (d,  $J = 7.2$  Hz, 1H), 3.87 (s, 3H), 3.29 (d,  $J = 7.2$  Hz, 1H), 2.55 (d,  $J = 3.0$  Hz, 1H), 2.31 (s, 1H), 1.62-1.54 (m, 2H), 1.40 (d,  $J = 10.6$  Hz, 1H), 1.35-1.31 (m, 1H), 1.19-1.15 (m, 2H). <sup>13</sup>C NMR (126 MHz, CDCl<sub>3</sub>) δ 166.97, 161.52, 135.28, 130.26, 124.32, 122.12, 109.16, 89.76, 51.97, 51.45, 42.50, 42.21, 32.07, 27.85, 23.34. Enantiomeric excess: 91%, determined by HPLC (Chiralpak IB, hexane/*i*-PrOH = 99/1; flow rate 0.5 ml/min; 25 °C; 254 nm), first peak:  $t_R = 14.2$  min, second peak:  $t_R = 14.9$  min; HRMS (ESI)  $m/z$  calcd. For C<sub>15</sub>H<sub>16</sub>NaO<sub>3</sub> [M+Na]<sup>+</sup> = 267.0992, found = 267.0991.

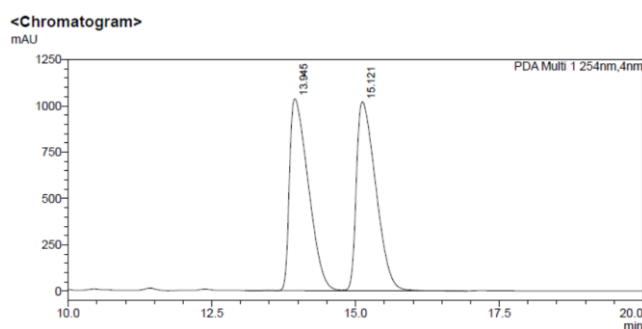

<Peak Table>  
PDA Ch1 254nm

| Peak# | Ret. Time | Height  | Height% | Area     | Area%   |
|-------|-----------|---------|---------|----------|---------|
| 1     | 13.945    | 1036221 | 50.383  | 23577784 | 49.627  |
| 2     | 15.121    | 1020486 | 49.617  | 23932663 | 50.373  |
| Total |           | 2056707 | 100.000 | 47510447 | 100.000 |

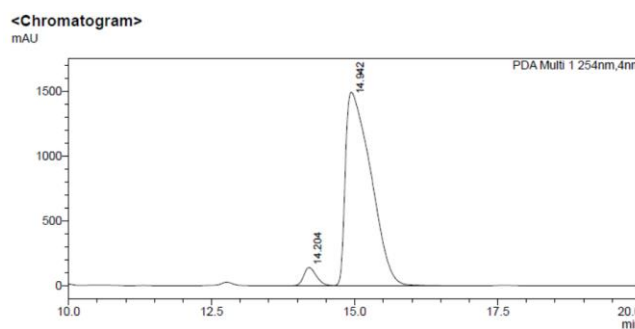

<Peak Table>  
PDA Ch1 254nm

| Peak# | Ret. Time | Height  | Height% | Area     | Area%   |
|-------|-----------|---------|---------|----------|---------|
| 1     | 14.204    | 140340  | 8.605   | 2165988  | 4.507   |
| 2     | 14.942    | 1490656 | 91.395  | 45897096 | 95.493  |
| Total |           | 1630996 | 100.000 | 48063085 | 100.000 |

### (1*R*,4*S*,4*aR*,9*bR*)-7-methyl-1,2,3,4,4*a*,9*b*-hexahydro-1,4-methanodibenzo[*b,d*]furan

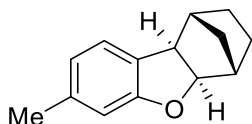

**5f**; amorphous solid (hexane/Et<sub>2</sub>O = 20:1, 40 mg, 66% isolated yield);  $[\alpha]_D^{20} = 33.151$  ( $c = 0.625$ , CHCl<sub>3</sub>); <sup>1</sup>H NMR (500 MHz, CDCl<sub>3</sub>) δ 7.25 (s, 1H), 6.98 (d,  $J = 7.4$  Hz, 1H), 6.62 (d,  $J = 7.4$  Hz, 1H), 4.66 (d,  $J = 7.0$  Hz, 1H), 3.22 (d,  $J = 7.2$  Hz, 1H), 2.51 (s, 1H), 2.27 (s, 4H), 1.56-1.51 (m, 2H), 1.44 (d,  $J = 10.8$  Hz, 1H), 1.34-1.28 (m, 1H), 1.17-1.10 (m, 2H). <sup>13</sup>C NMR (126 MHz, CDCl<sub>3</sub>) δ 161.59, 138.14, 126.68, 124.22, 120.74, 109.18, 89.51, 51.34, 42.53, 42.21, 32.03, 27.85, 23.49, 21.46. Enantiomeric excess: 95%, determined by HPLC (Chiralpak IB, hexane/*i*-PrOH = 100/0; flow rate 0.5 ml/min; 25 °C; 220 nm), first peak:  $t_R = 11.4$  min, second peak:  $t_R = 13.4$  min; HRMS (ESI)  $m/z$  calcd. For C<sub>14</sub>H<sub>16</sub>NaO [M+Na]<sup>+</sup> = 223.1093, found = 223.1089.

## Supporting Information

<Chromatogram>

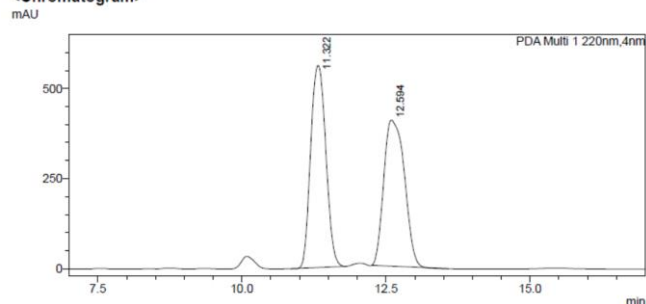

<Peak Table>

| Peak# | Ret. Time | Height | Height% | Area     | Area%   |
|-------|-----------|--------|---------|----------|---------|
| 1     | 11.322    | 560999 | 58.043  | 10289908 | 50.407  |
| 2     | 12.594    | 405522 | 41.957  | 10123688 | 49.593  |
| Total |           | 966521 | 100.000 | 20413596 | 100.000 |

<Chromatogram>

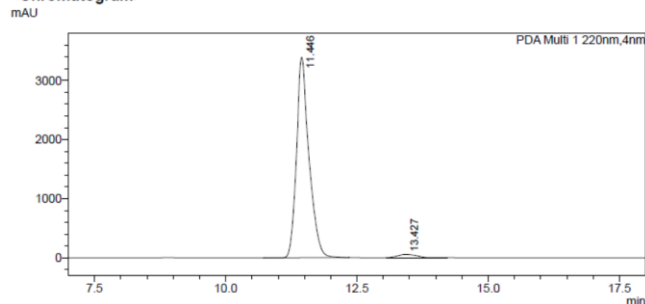

<Peak Table>

| Peak# | Ret. Time | Height  | Height% | Area     | Area%   |
|-------|-----------|---------|---------|----------|---------|
| 1     | 11.446    | 3394776 | 98.435  | 56243297 | 97.630  |
| 2     | 13.427    | 53665   | 1.565   | 1365382  | 2.370   |
| Total |           | 3448742 | 100.000 | 57608688 | 100.000 |

### (1*R*,4*S*,4*aR*,9*aR*)-4,4*a*,9,9*a*-tetrahydro-1*H*-1,4-methanocarbazole

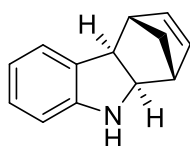

**7**; yellow oil (hexane/EtOAc = 20:1, 28 mg, 73% isolated yield);  $[\alpha]_D^{20} = -20.1196$  ( $c = 0.25$ ,  $\text{CH}_2\text{Cl}_2$ );  $^1\text{H}$  NMR (500 MHz,  $\text{C}_6\text{D}_6$ )  $\delta$  7.03 (t,  $J = 7.6$  Hz, 1H), 6.97 (d,  $J = 7.3$  Hz, 1H), 6.72 (td,  $J = 7.4, 0.8$  Hz, 1H), 6.36 (d,  $J = 7.8$  Hz, 1H), 6.05 (dd,  $J = 5.8, 2.9$  Hz, 1H), 5.82 (dd,  $J = 5.8, 3.0$  Hz, 1H), 3.55 (d,  $J = 8.1$  Hz, 1H), 3.24 (d,  $J = 8.1$  Hz, 1H), 2.88 (s, 1H), 2.70 (s, 1H), 2.48 (s, 1H), 1.67 (d,  $J = 8.8$  Hz, 1H), 1.42-1.40 (m, 1H);  $^{13}\text{C}$  NMR (126 MHz,  $\text{C}_6\text{D}_6$ )  $\delta$  154.76, 139.77, 135.41, 129.60, 128.04, 124.42, 118.20, 108.85, 64.27, 50.69, 50.63, 48.75, 42.50; Enantiomeric excess: 94%, determined by HPLC (Chiralpak IF, hexane/*i*-PrOH = 99/1; flow rate 0.8 ml/min; 25 °C; 254 nm), first peak:  $t_R = 9.1$  min, second peak:  $t_R = 9.7$  min; HRMS (ESI)  $m/z$  calcd. For  $\text{C}_{13}\text{H}_{14}\text{N}$   $[\text{M}+\text{H}]^+ = 184.1121$ , found = 184.1113.

<Chromatogram>

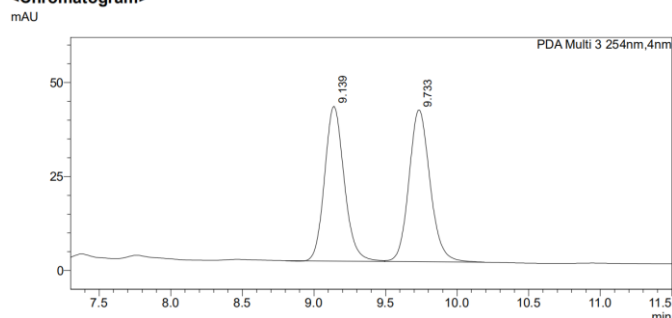

<Peak Table>

| Peak# | Ret. Time | Height | Height% | Area   | Area%   |
|-------|-----------|--------|---------|--------|---------|
| 1     | 9.139     | 41198  | 50.527  | 392491 | 48.625  |
| 2     | 9.733     | 40338  | 49.473  | 414695 | 51.375  |
| Total |           | 81536  | 100.000 | 807186 | 100.000 |

<Chromatogram>

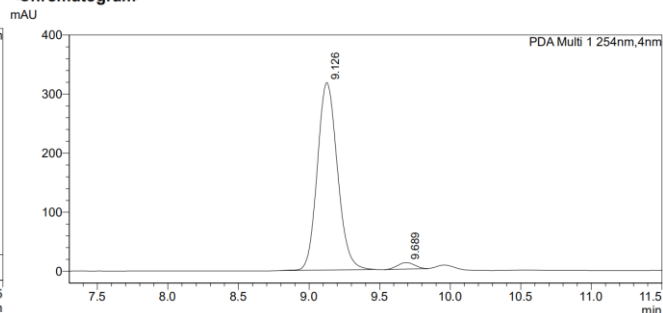

<Peak Table>

| Peak# | Ret. Time | Height | Height% | Area    | Area%   |
|-------|-----------|--------|---------|---------|---------|
| 1     | 9.126     | 316994 | 96.661  | 3142430 | 97.153  |
| 2     | 9.689     | 10950  | 3.339   | 92076   | 2.847   |
| Total |           | 327944 | 100.000 | 3234506 | 100.000 |

### (1*S*,4*R*,4*aR*,9*bR*)-1,4,4*a*,9*b*-tetrahydro-1,4-methanodibenzo[*b*,*d*]furan

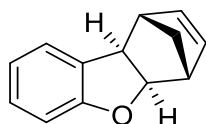

## Supporting Information

**8**; yellow oil (hexane/EtOAc = 100:0, 25 mg, 45% isolated yield);  $[\alpha]_D^{20} = 40.5192$  ( $c = 0.25$ ,  $\text{CHCl}_3$ ); Enantiomeric excess: 95%, determined by HPLC (Chiralpak OJ-H, hexane/*i*-PrOH = 100/0; flow rate 0.8 ml/min; 25 °C; 210 nm), first peak:  $t_R = 11.4$  min, second peak:  $t_R = 13.2$  min; HRMS (ESI)  $m/z$  calcd. For  $\text{C}_{13}\text{H}_{13}\text{O}$   $[\text{M}+\text{H}]^+ = 185.0961$ , found = 185.0957. (Please refer to Catellani's work for  $^1\text{H}$  and  $^{13}\text{C}$  NMR)<sup>[3]</sup>

<Chromatogram>  
mAU

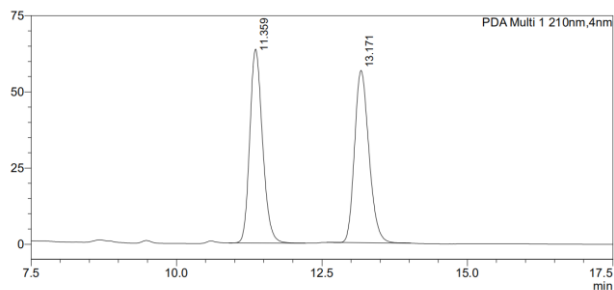

<Peak Table>

| Peak# | Ret. Time | Height | Height% | Area    | Area%   |
|-------|-----------|--------|---------|---------|---------|
| 1     | 11.359    | 63653  | 52.951  | 971099  | 49.893  |
| 2     | 13.171    | 56559  | 47.049  | 975250  | 50.107  |
| Total |           | 120212 | 100.000 | 1946349 | 100.000 |

<Chromatogram>  
mAU

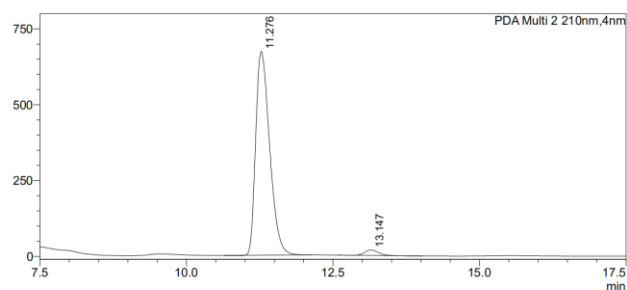

<Peak Table>

| Peak# | Ret. Time | Height | Height% | Area     | Area%   |
|-------|-----------|--------|---------|----------|---------|
| 1     | 11.276    | 672313 | 97.404  | 11128515 | 97.512  |
| 2     | 13.147    | 17918  | 2.596   | 283922   | 2.488   |
| Total |           | 690231 | 100.000 | 11412438 | 100.000 |

## Supporting Information

### 6. X-ray structure of 3a and 5e

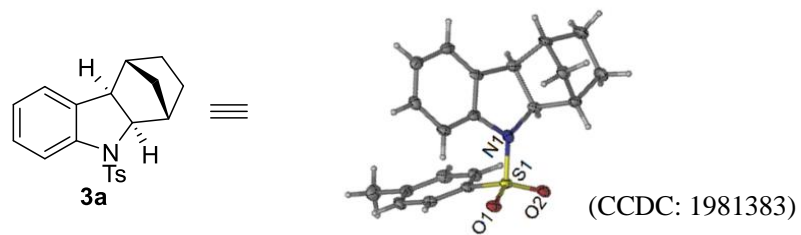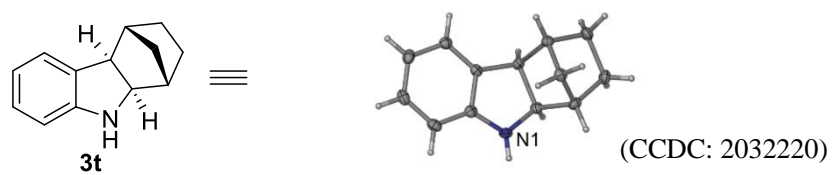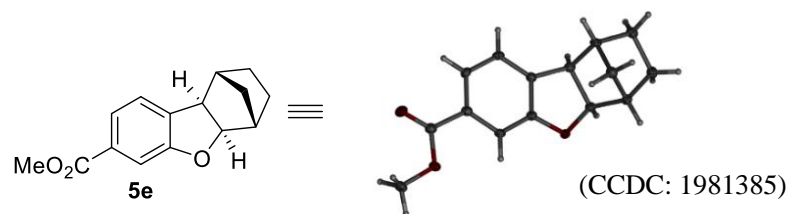

## Supporting Information

### 7. Confirmation of the absolute configuration of **3t**, **3u**, **7** and **8**

The absolute configuration of compounds **3t**, **3u**, **7** and **8** was confirmed by comparing the rotational value of a series of transformed products with the previous products **3a** and **5a**.

#### 7.1 Confirmation of the absolute configuration of **3t**

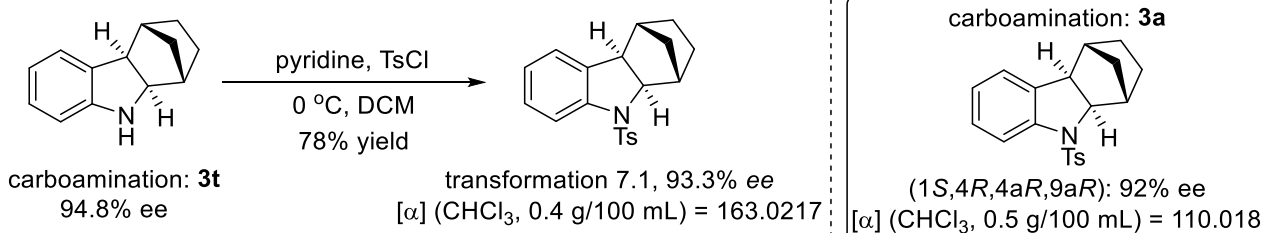

#### 7.2 Confirmation of the absolute configuration of **3u**

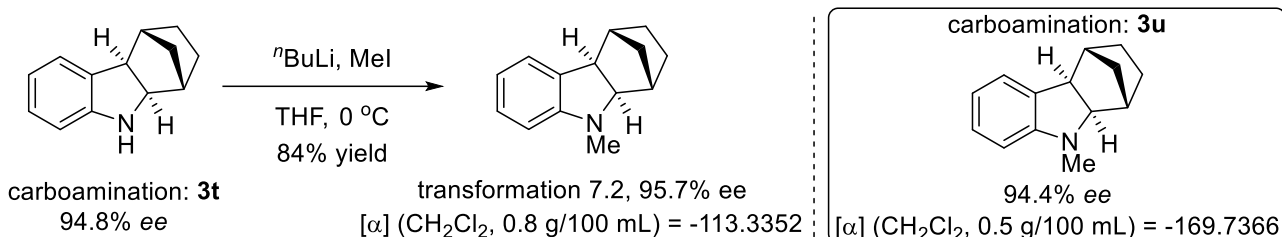

#### 7.3 Confirmation of the absolute configuration of **7**

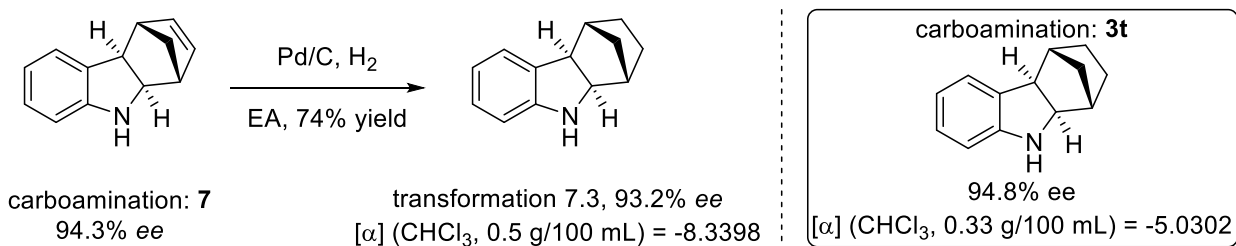

#### 7.4 Confirmation of the absolute configuration of **8**

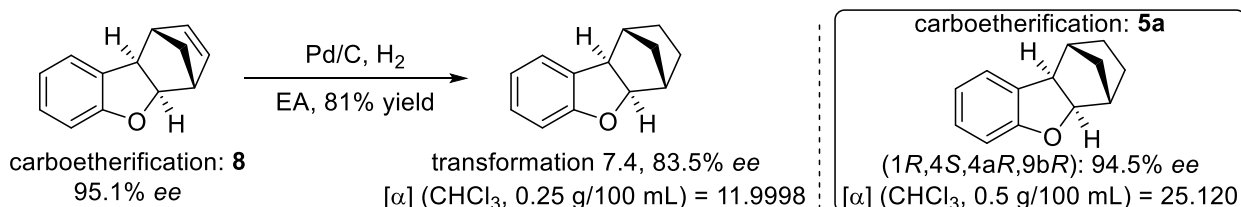



### 8. References

- 1 T. W. Liwosz and S. R. Chemler, *Chem. Eur. J.*, 2013, **19**, 12771.
- 2 M. Tao, Y. Tu, Y. Liu, H. Wu, L. Liu and J. Zhang, *Chem. Sci.*, 2020, **11**, 6283.
- 3 M. Catellani and A. Del Rio, *Russ. Chem. Bull.*, 1998, **47**, 928.

## Supporting Information

### 9. $^1\text{H}$ , $^{13}\text{C}$ , $^{19}\text{F}$ Spectra for 3, 5 and 7

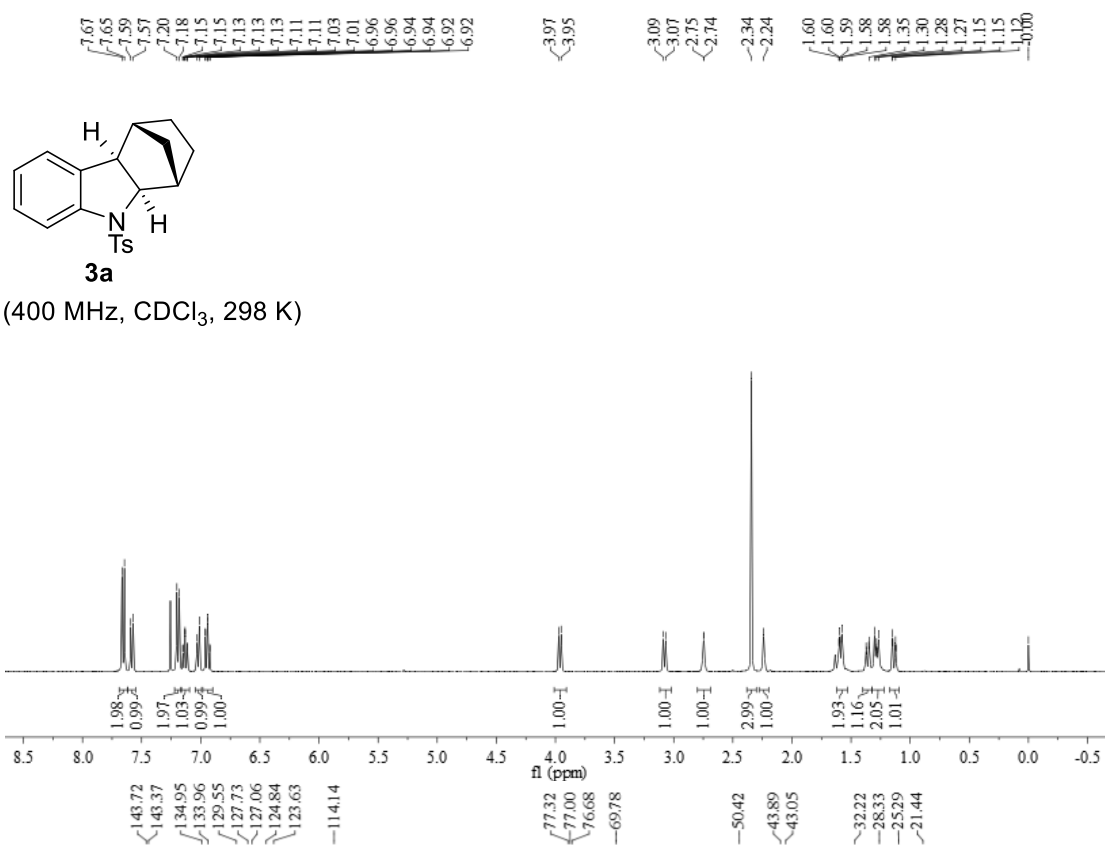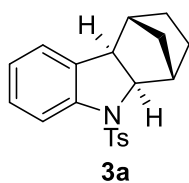

$^{13}\text{C}$  NMR (101 MHz,  $\text{CDCl}_3$ , 298 K)

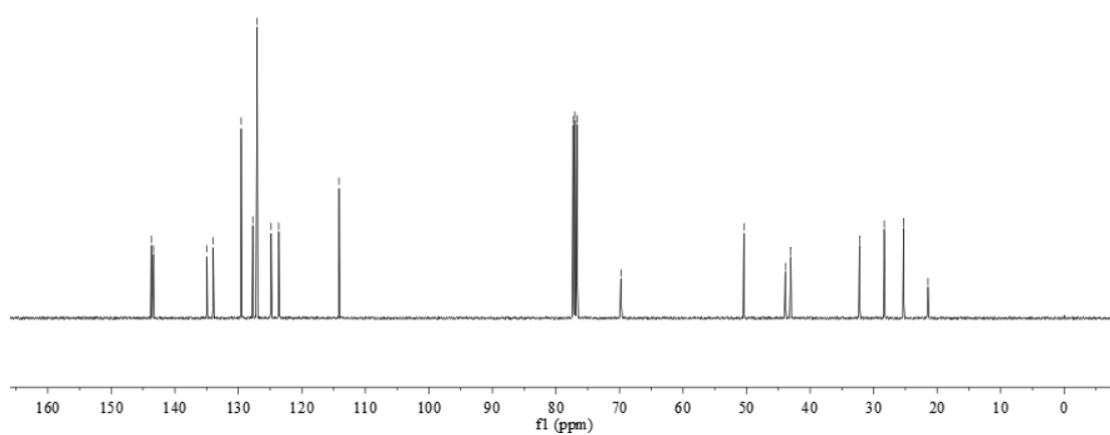

# Supporting Information

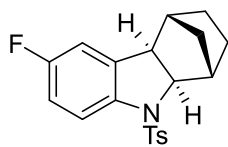

**3b**

$^1\text{H}$  NMR (400 MHz,  $\text{CDCl}_3$ , 298 K)

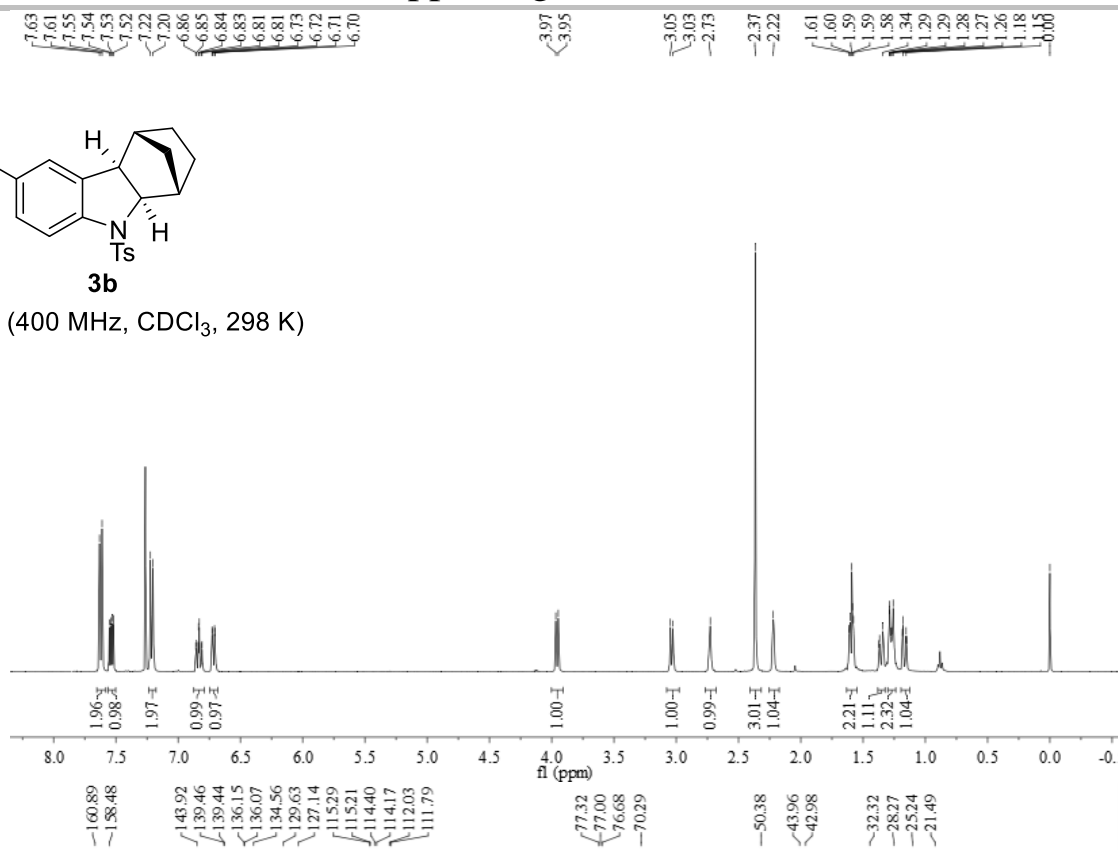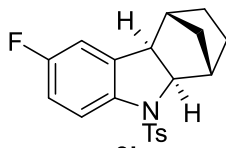

**3b**

$^{13}\text{C}$  NMR (101 MHz,  $\text{CDCl}_3$ , 298 K)

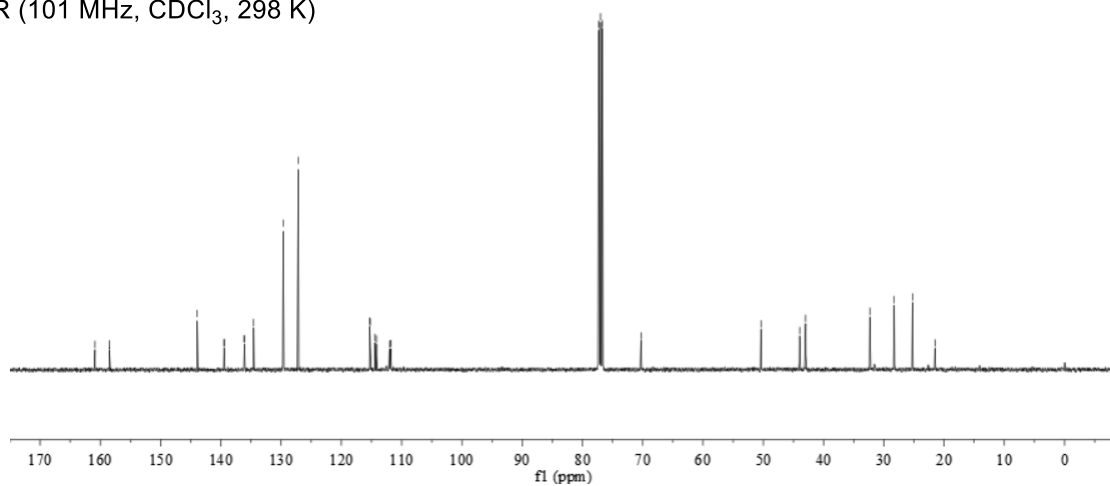

## Supporting Information

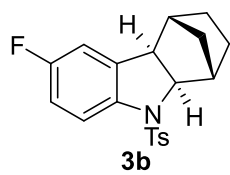

$^{19}\text{F}$  NMR (376 MHz,  $\text{CDCl}_3$ , 298 K)

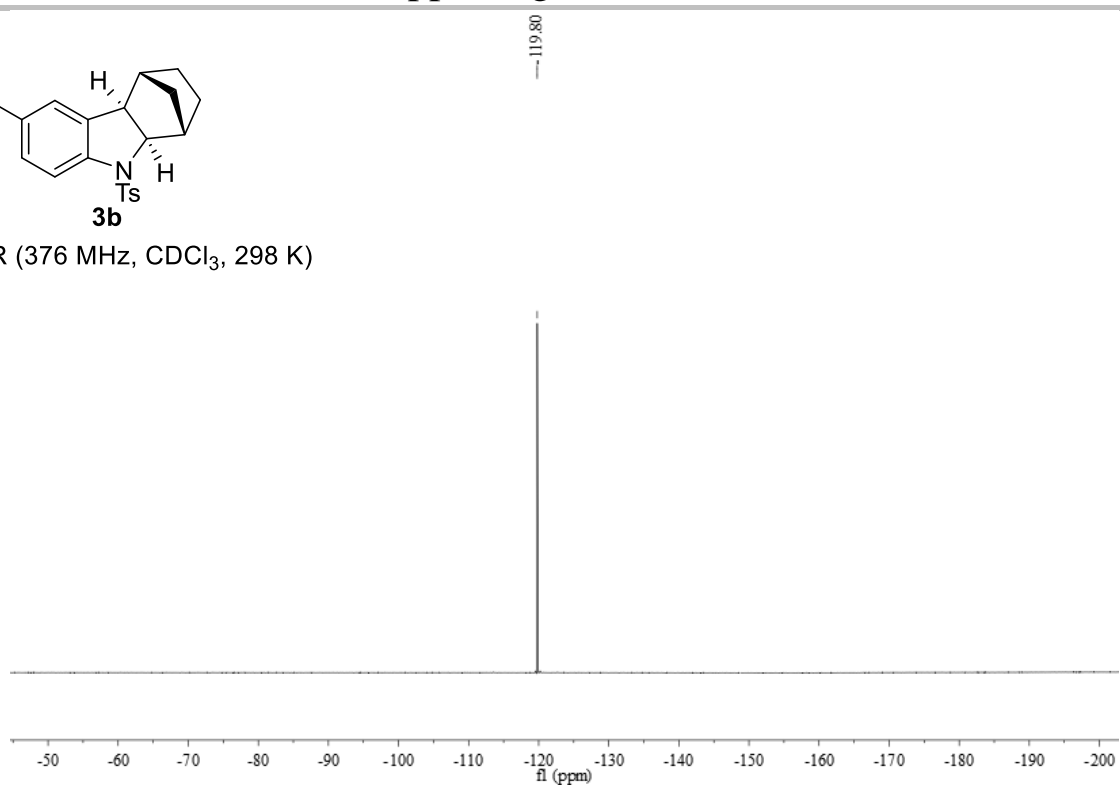

# Supporting Information

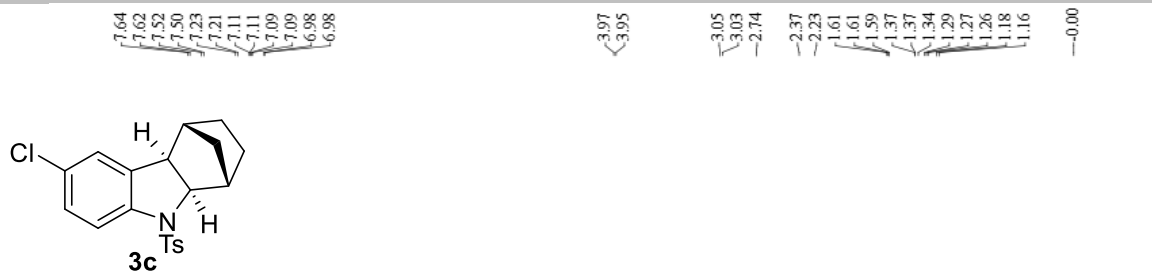

$^1\text{H}$  NMR (400 MHz,  $\text{CDCl}_3$ , 298 K)

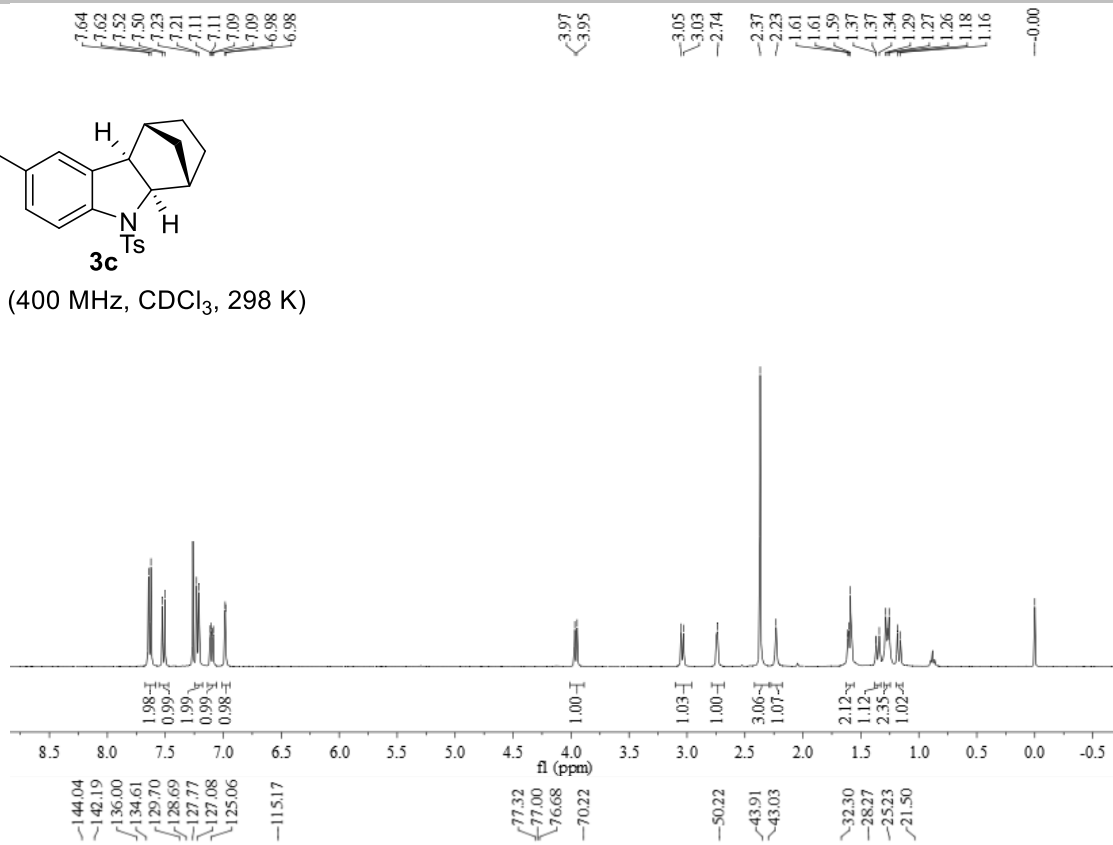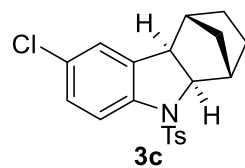

$^{13}\text{C}$  NMR (101 MHz,  $\text{CDCl}_3$ , 298 K)

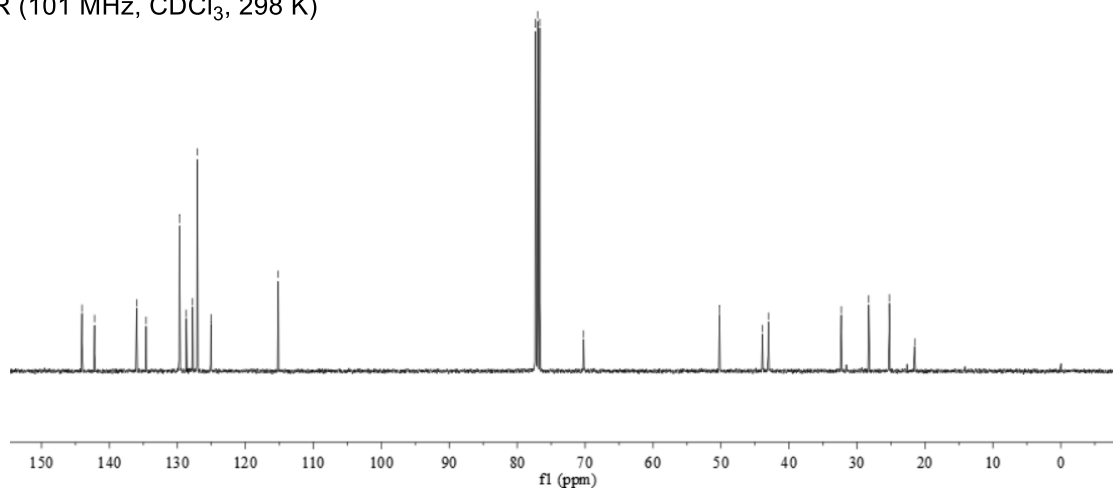

# Supporting Information

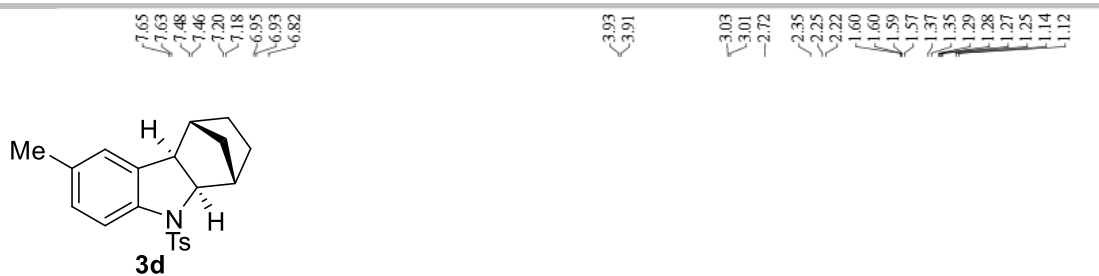

$^1\text{H}$  NMR (400 MHz,  $\text{CDCl}_3$ , 298 K)

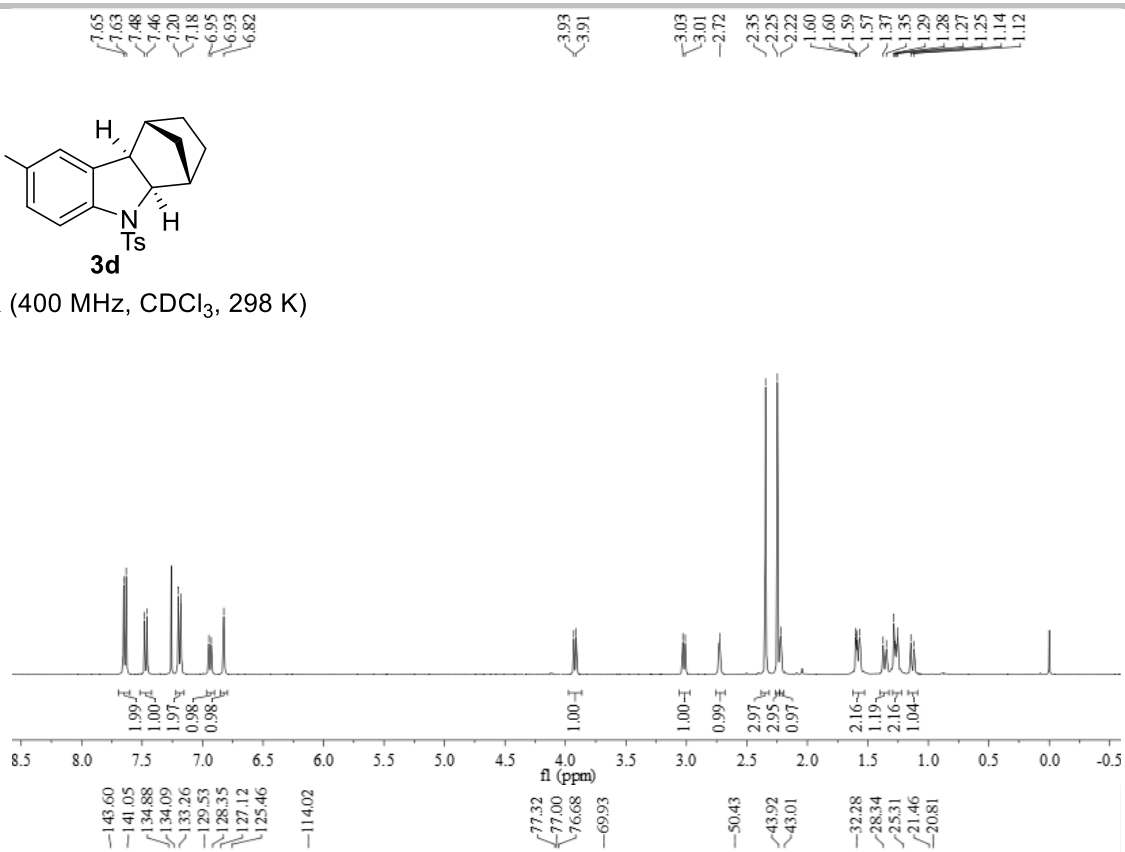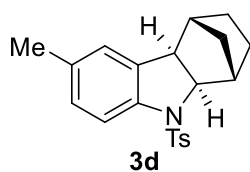

$^{13}\text{C}$  NMR (101 MHz,  $\text{CDCl}_3$ , 298 K)

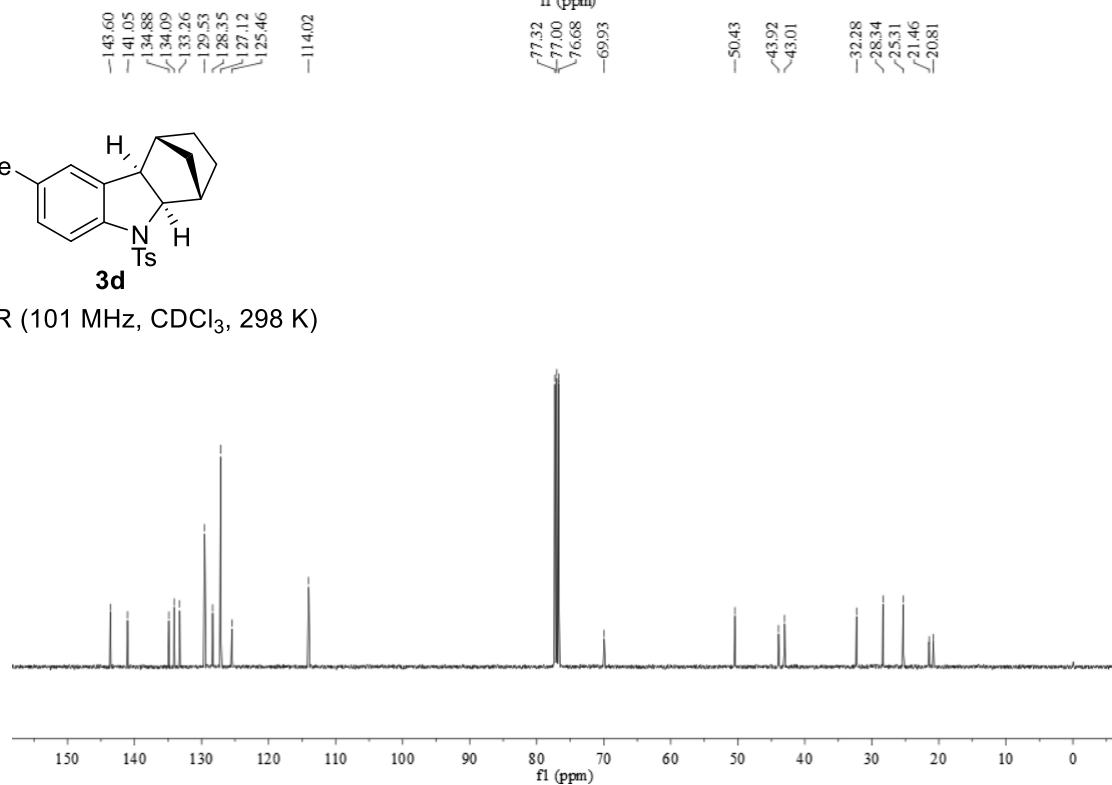

# Supporting Information

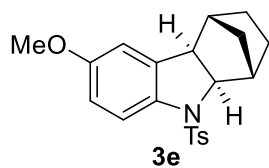

$^1\text{H}$  NMR (400 MHz,  $\text{CDCl}_3$ , 298 K)

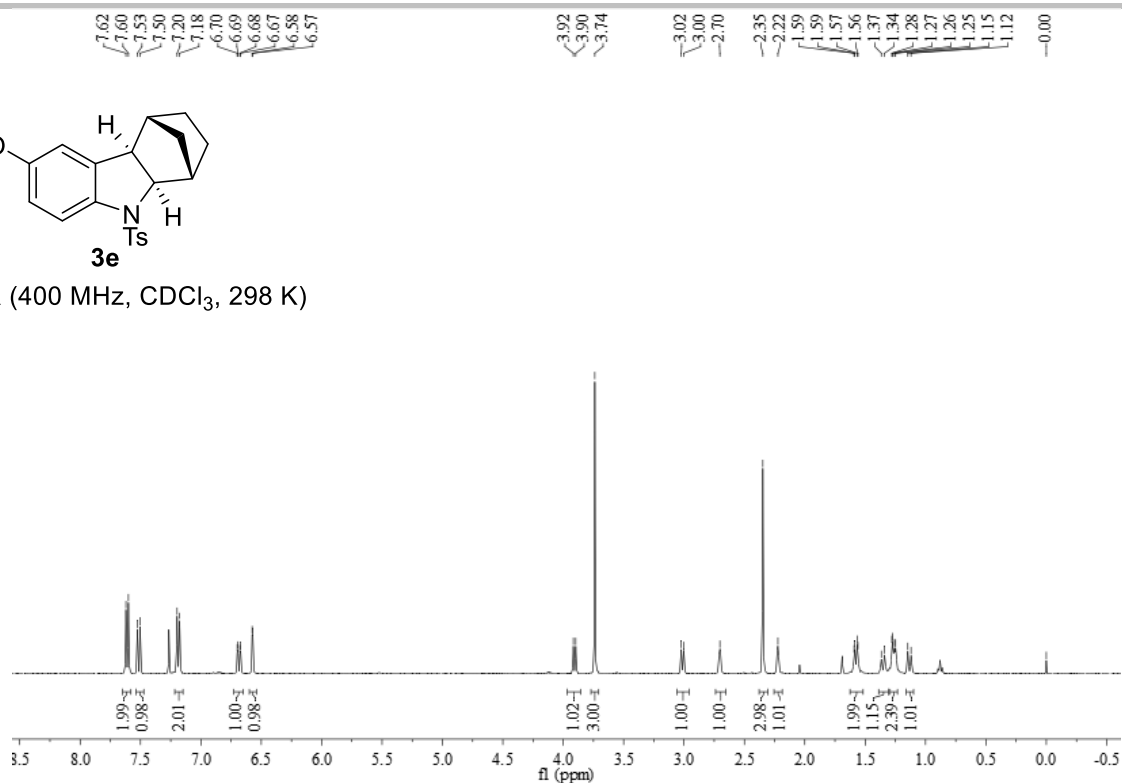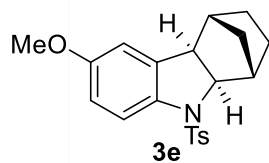

$^{13}\text{C}$  NMR (101 MHz,  $\text{CDCl}_3$ , 298 K)

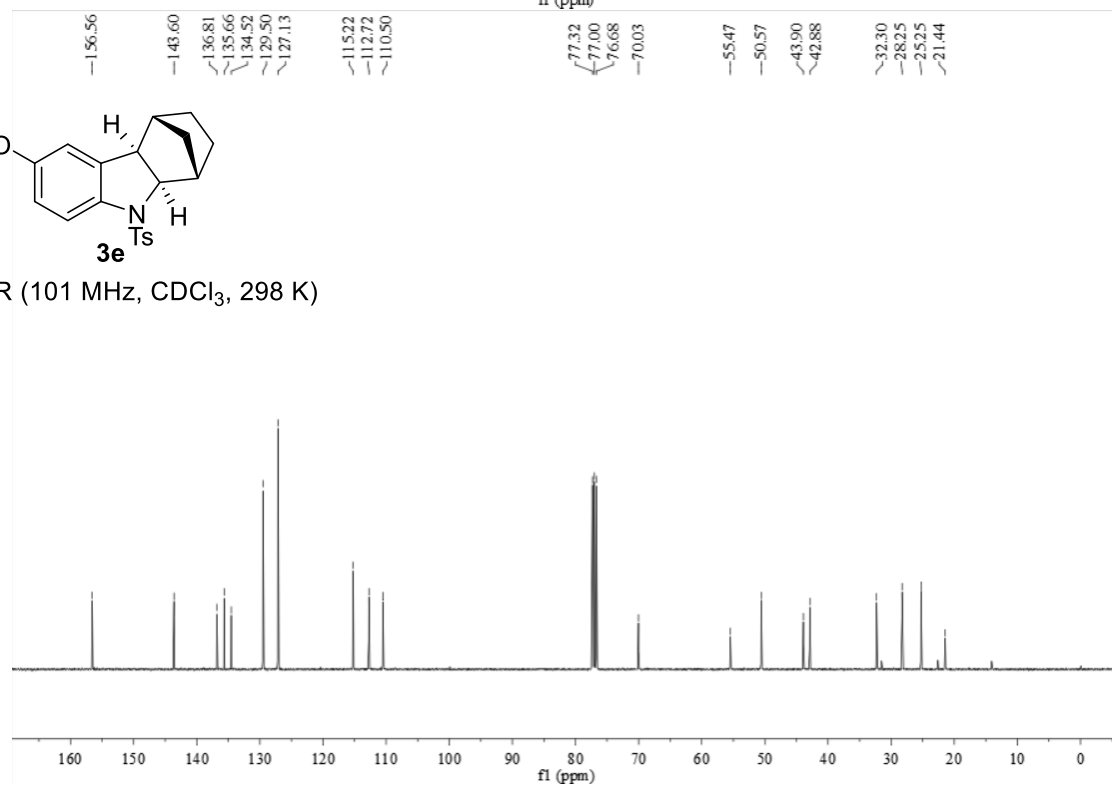

# Supporting Information

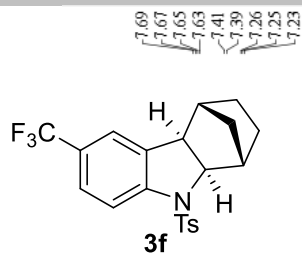

$^1\text{H NMR}$  (400 MHz,  $\text{CDCl}_3$ , 298 K)

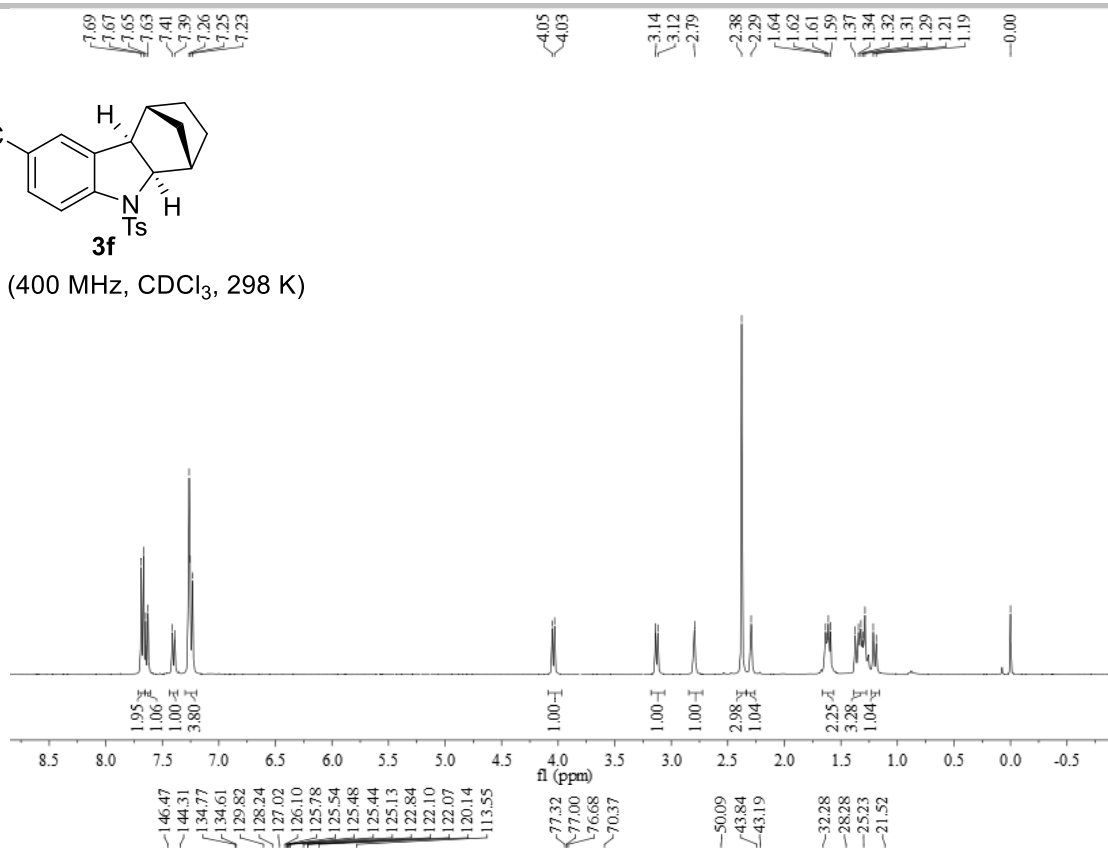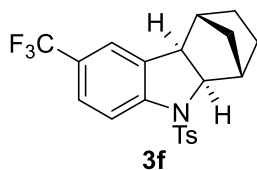

$^{13}\text{C NMR}$  (101 MHz,  $\text{CDCl}_3$ , 298 K)

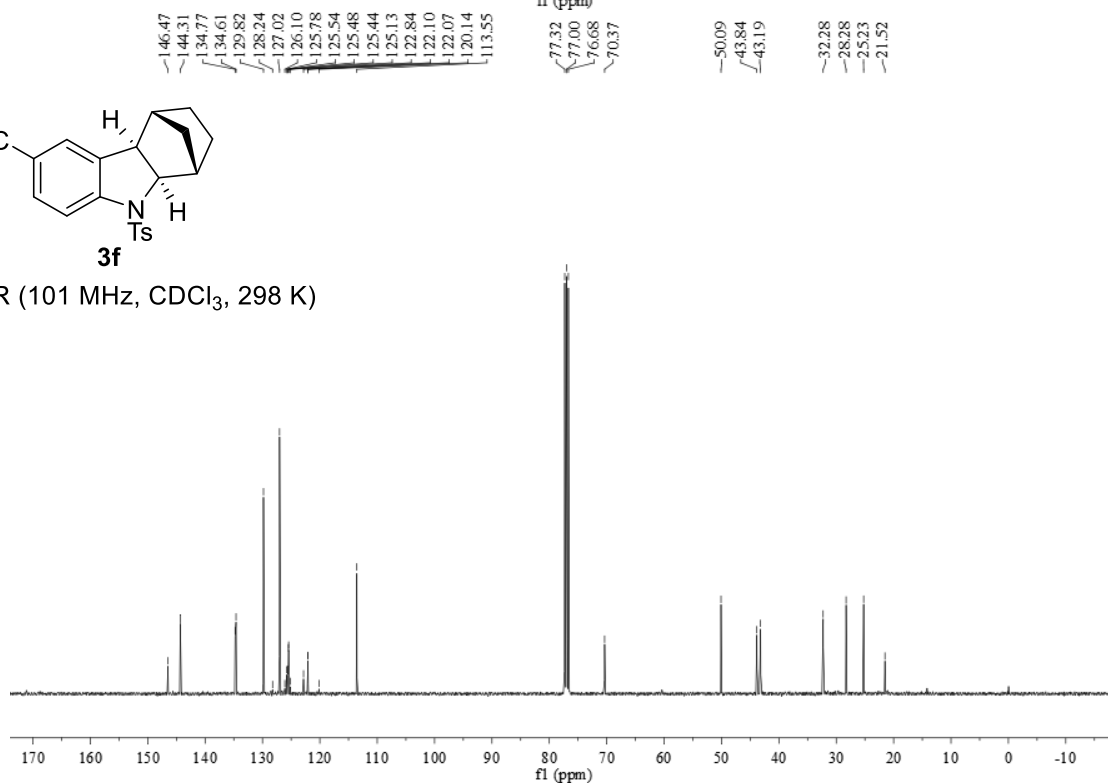



# Supporting Information

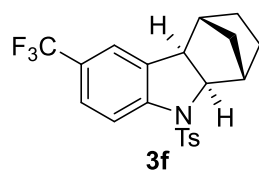

$^{19}\text{F}$  NMR (376 MHz,  $\text{CDCl}_3$ , 298 K)

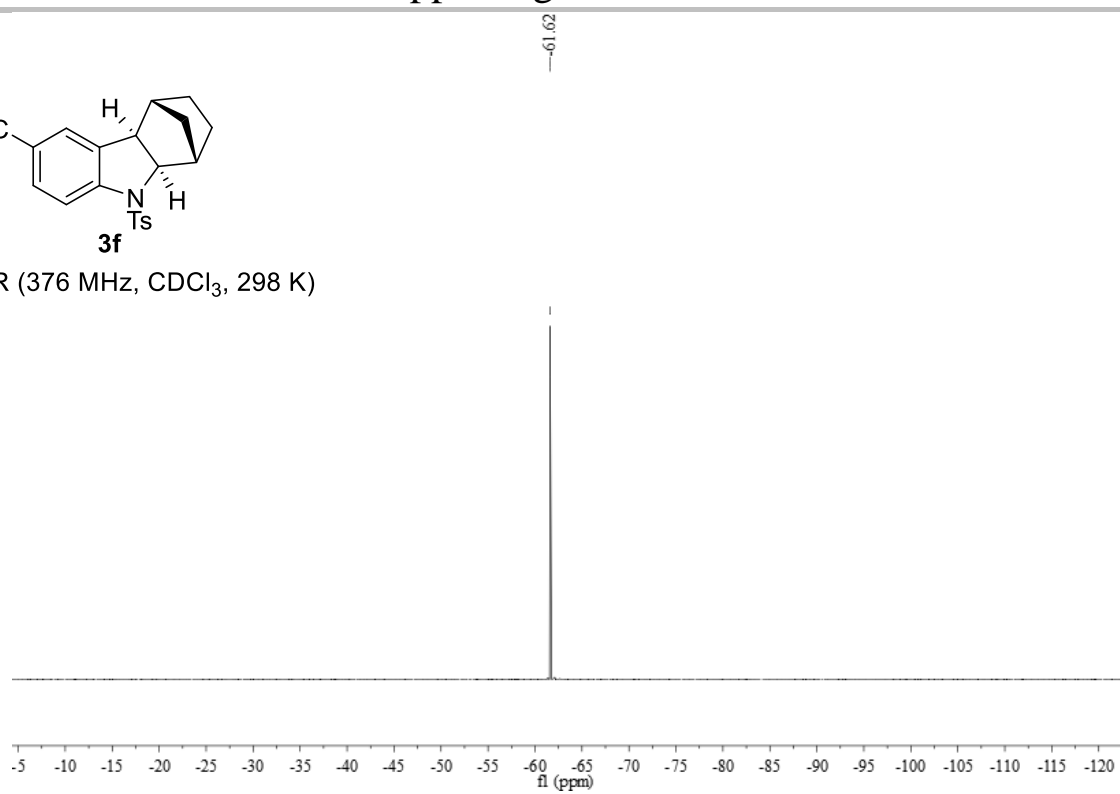

# Supporting Information

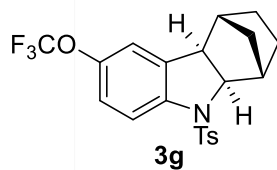

$^1\text{H}$  NMR (400 MHz,  $\text{CDCl}_3$ , 298 K)

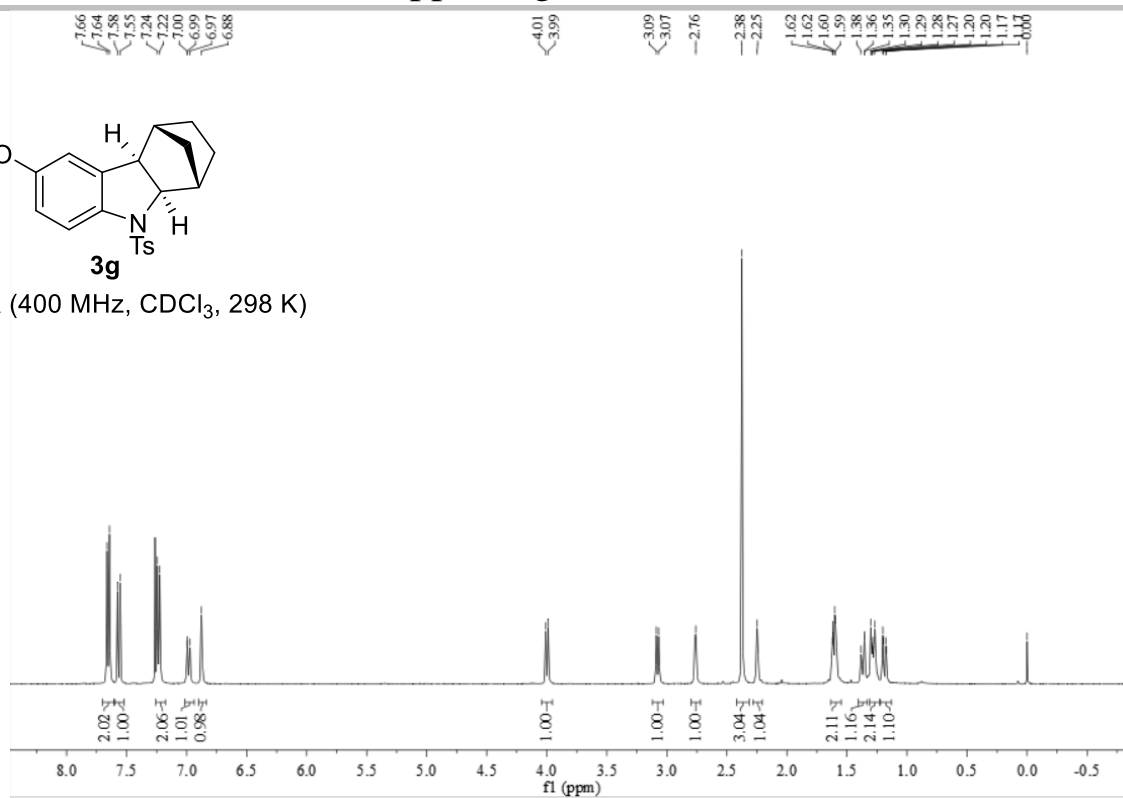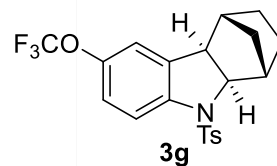

$^{13}\text{C}$  NMR (101 MHz,  $\text{CDCl}_3$ , 298 K)

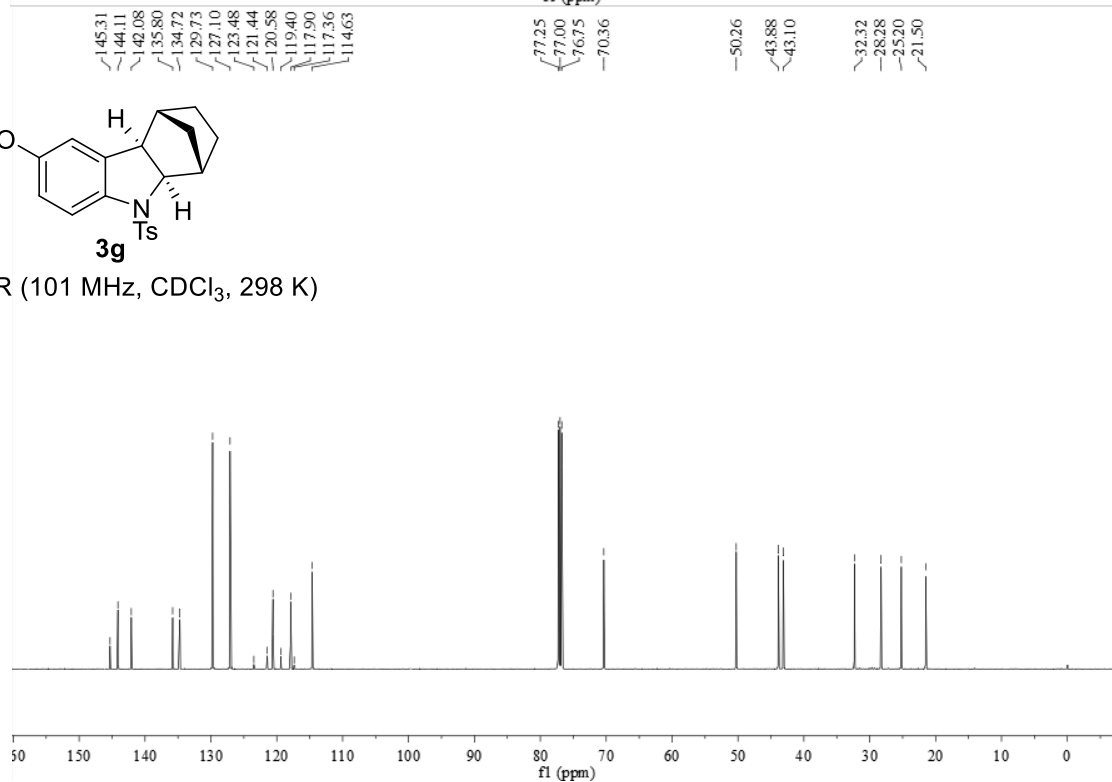

## Supporting Information

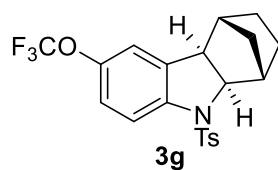

$^{19}\text{F}$  NMR (376 MHz,  $\text{CDCl}_3$ , 298 K)

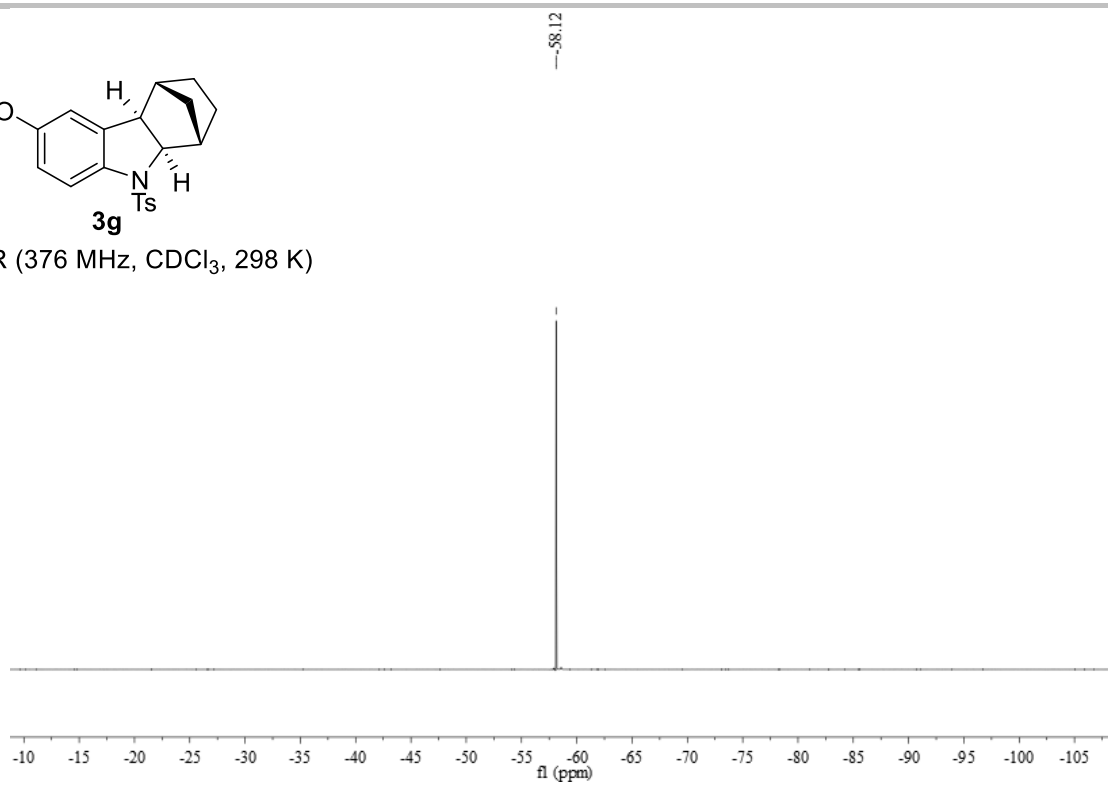

# Supporting Information

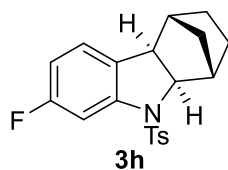

$^1\text{H}$  NMR (400 MHz,  $\text{CDCl}_3$ , 298 K)

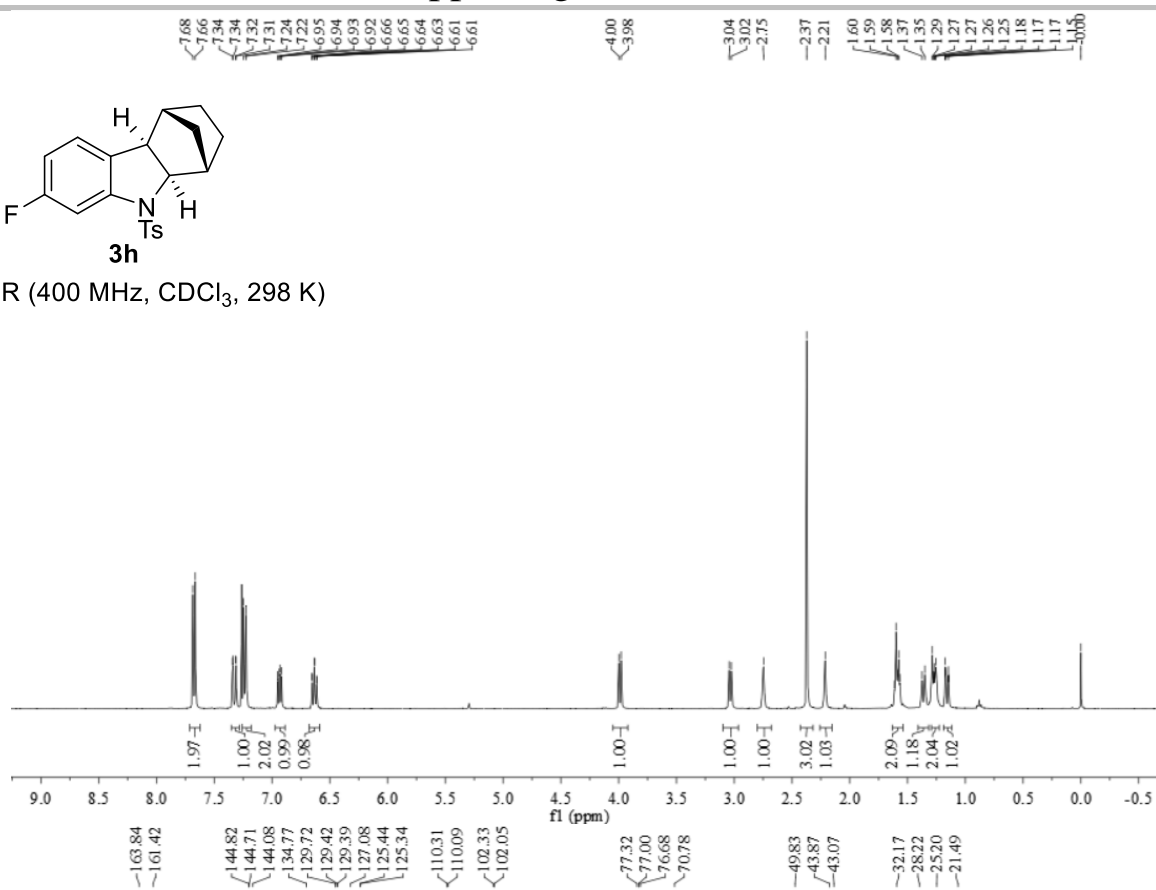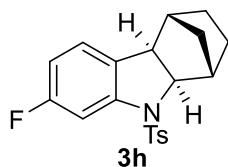

$^{13}\text{C}$  NMR (101 MHz,  $\text{CDCl}_3$ , 298 K)

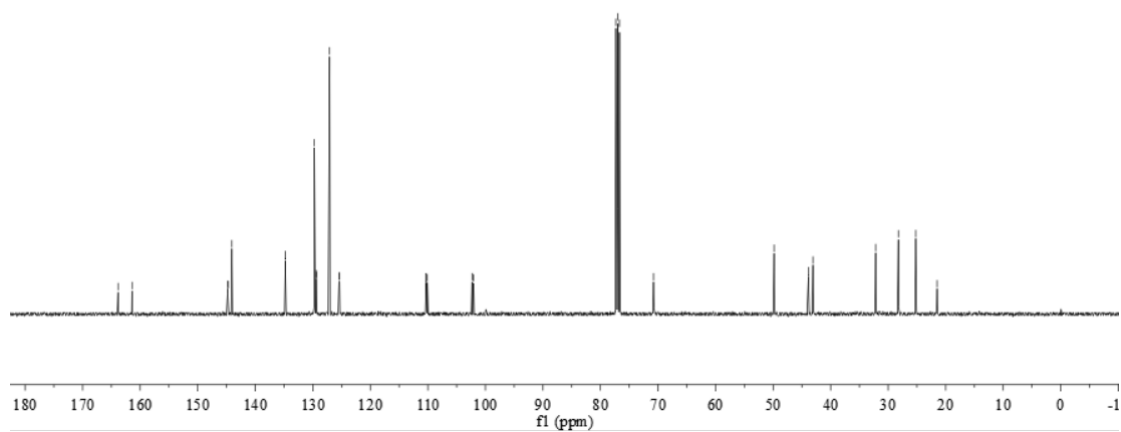

# Supporting Information

-113.74

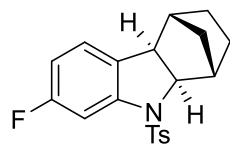

**3h**

$^{19}\text{F}$  NMR (376 MHz,  $\text{CDCl}_3$ , 298 K)

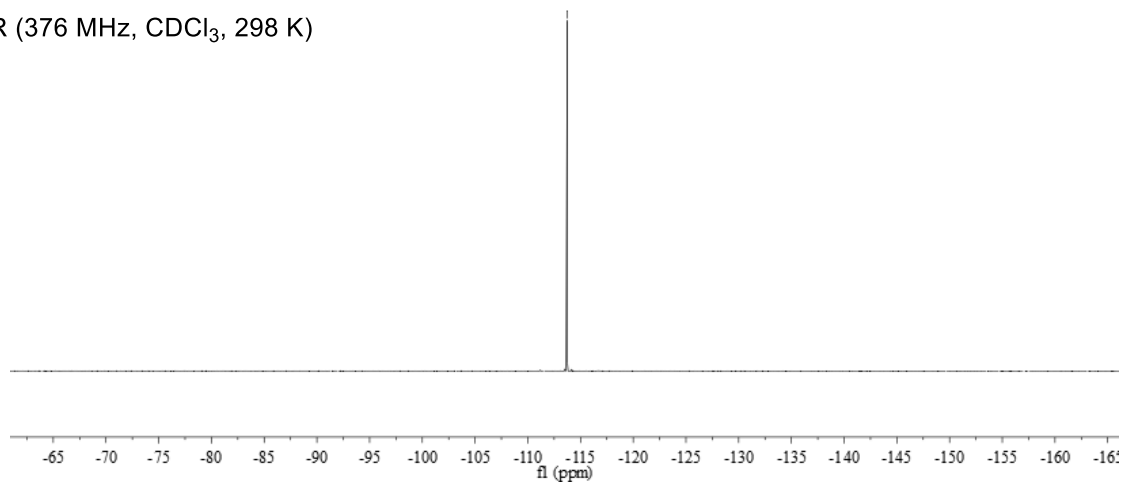

# Supporting Information

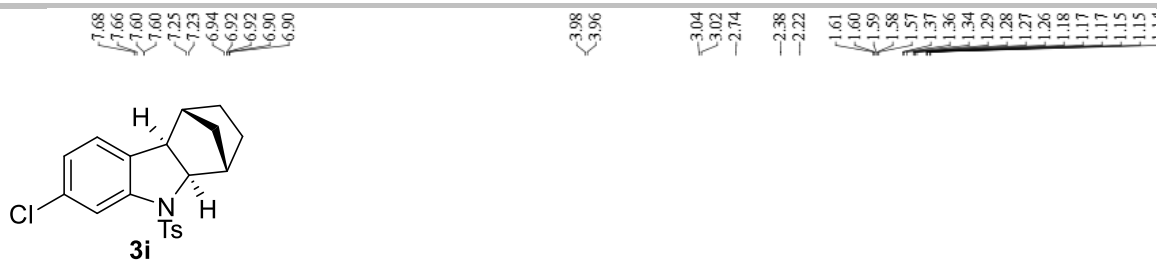

$^1\text{H}$  NMR (400 MHz,  $\text{CDCl}_3$ , 298 K)

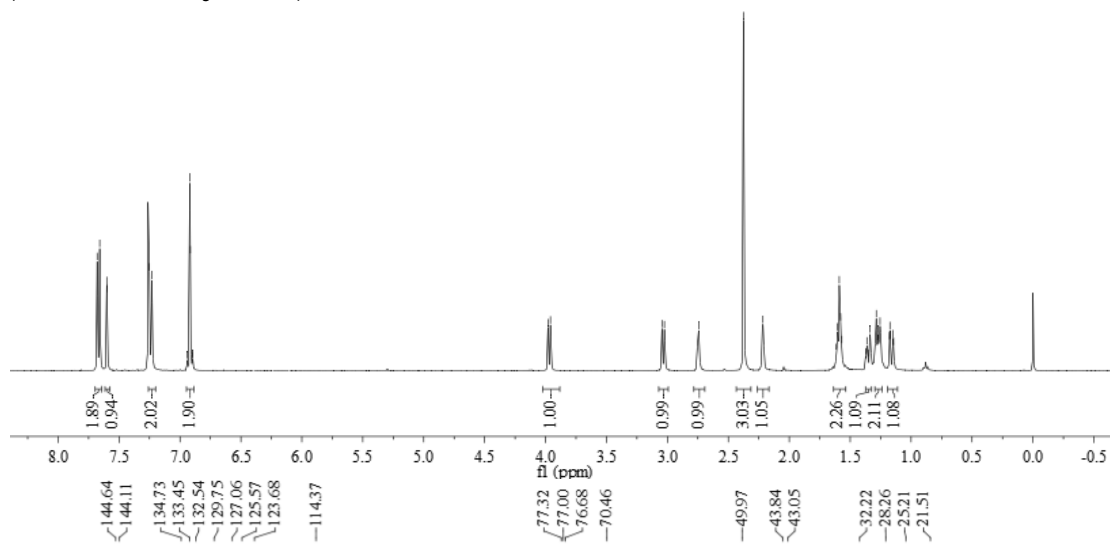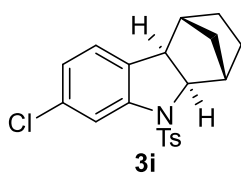

$^{13}\text{C}$  NMR (101 MHz,  $\text{CDCl}_3$ , 298 K)

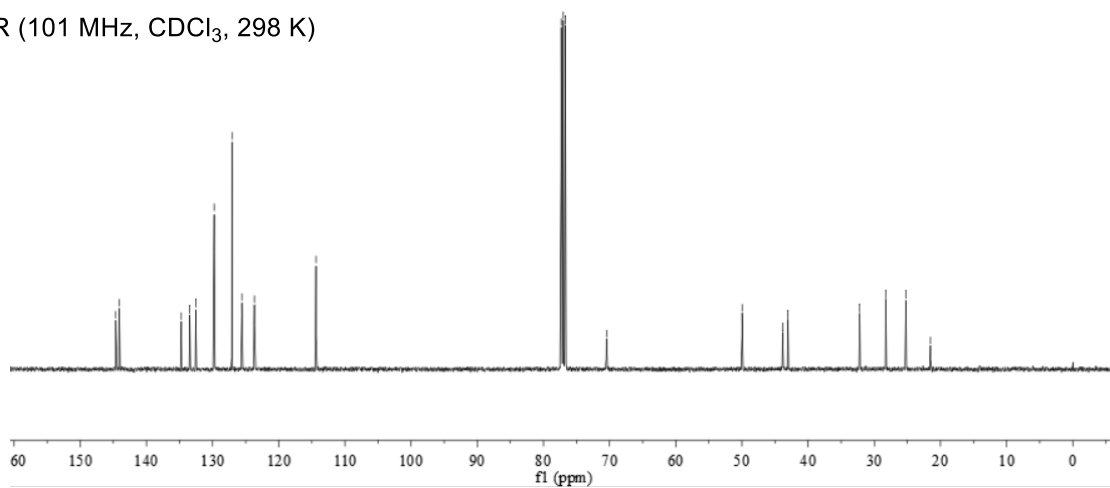

# Supporting Information

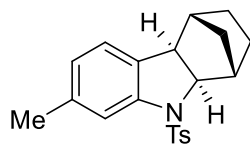

**3j**

$^1\text{H NMR}$  (400 MHz,  $\text{CDCl}_3$ , 298 K)

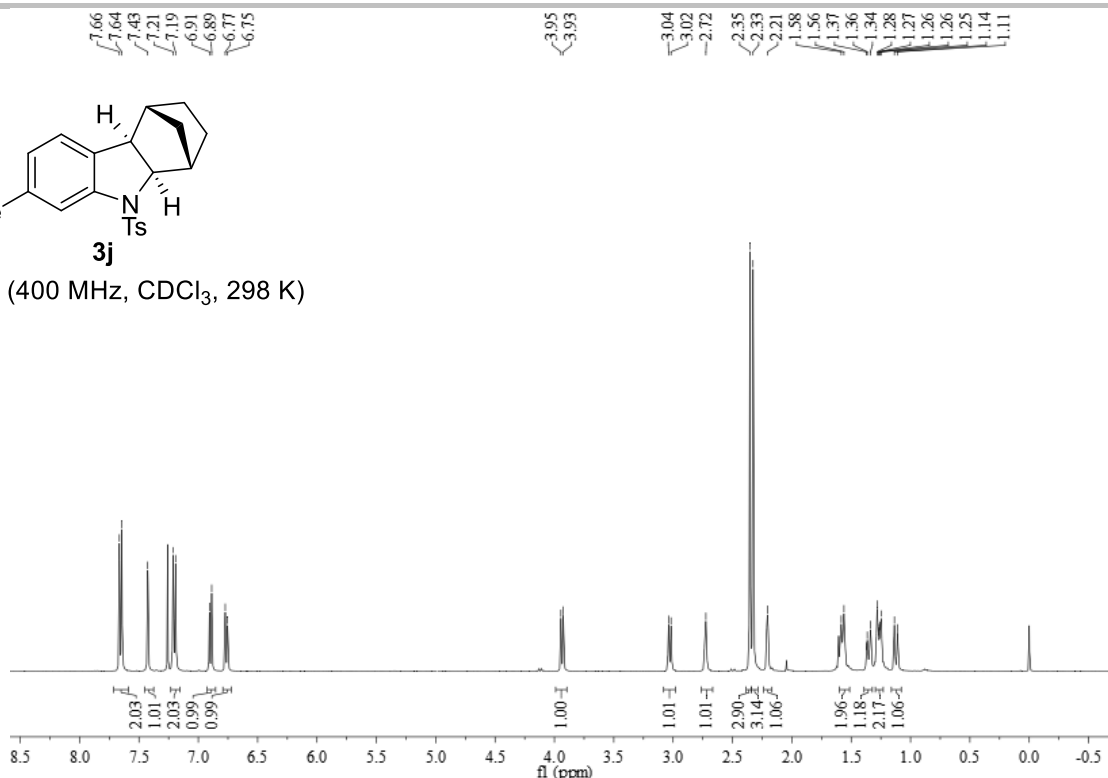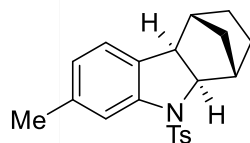

**3j**

$^{13}\text{C NMR}$  (101 MHz,  $\text{CDCl}_3$ , 298 K)

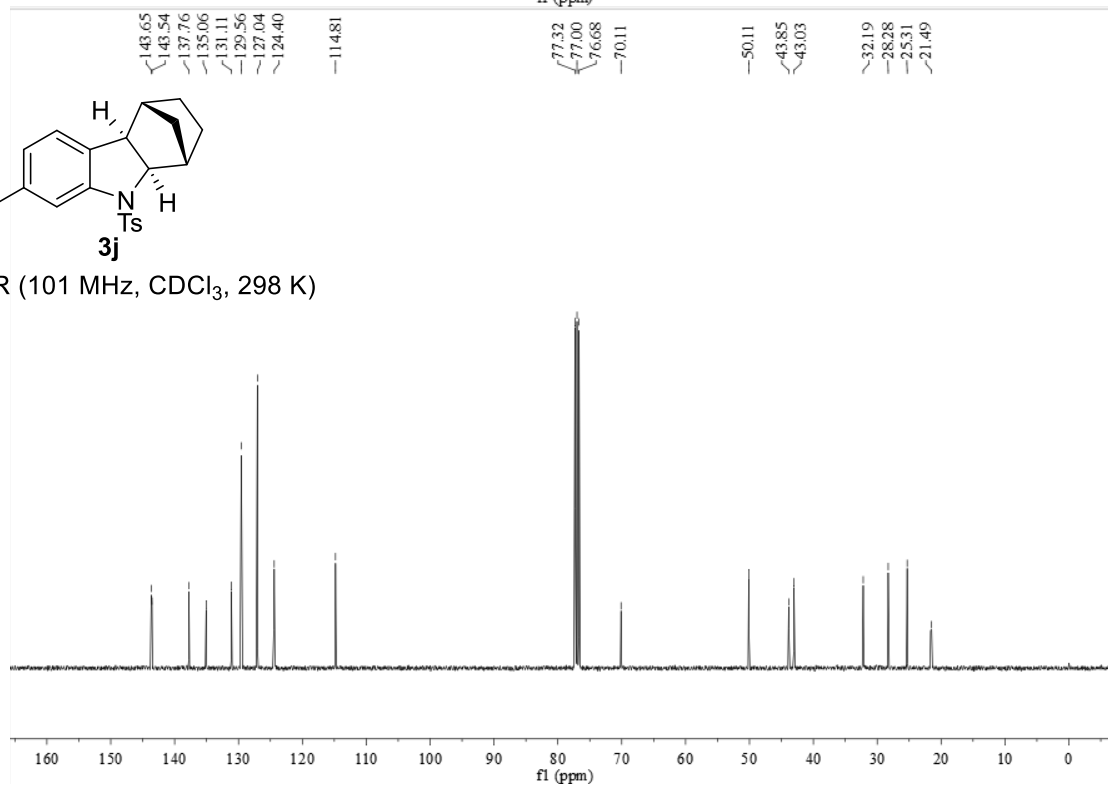

# Supporting Information

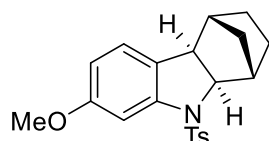

**3k**

$^1\text{H}$  NMR (400 MHz,  $\text{CDCl}_3$ , 298 K)

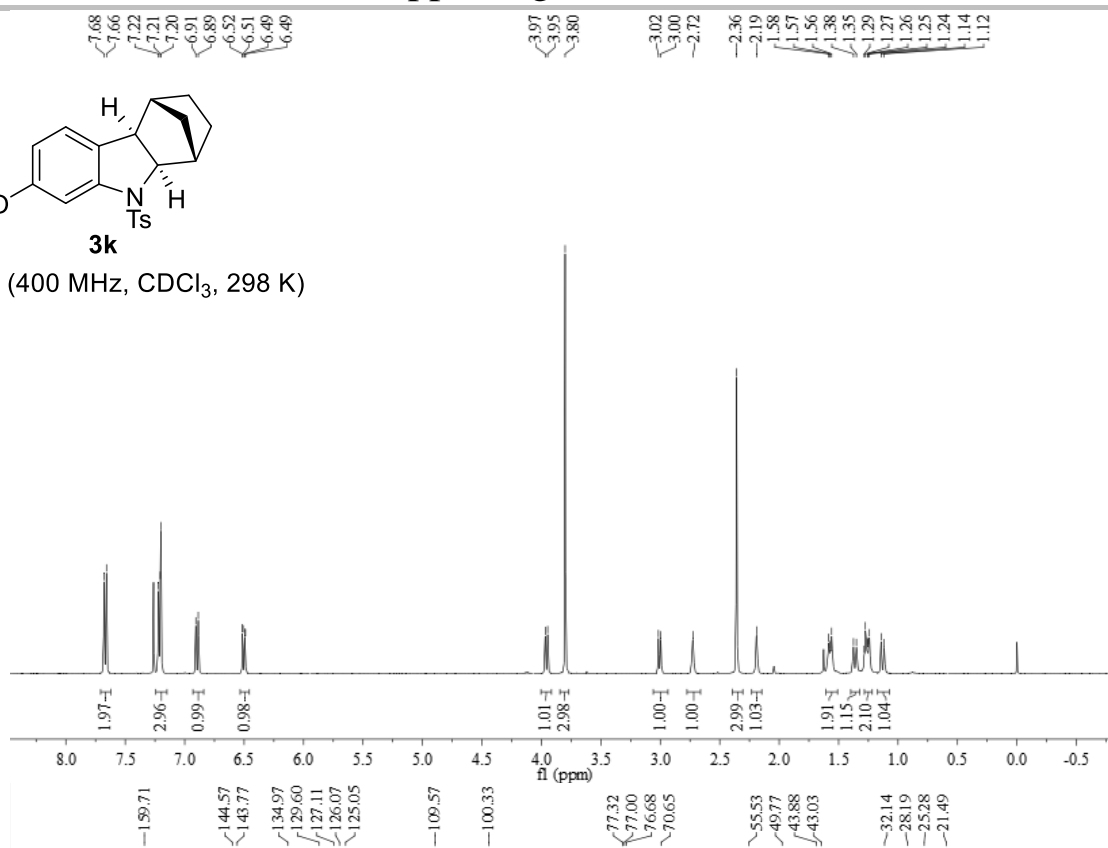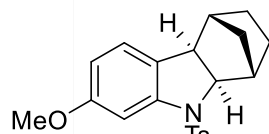

**3k**

$^{13}\text{C}$  NMR (101 MHz,  $\text{CDCl}_3$ , 298 K)

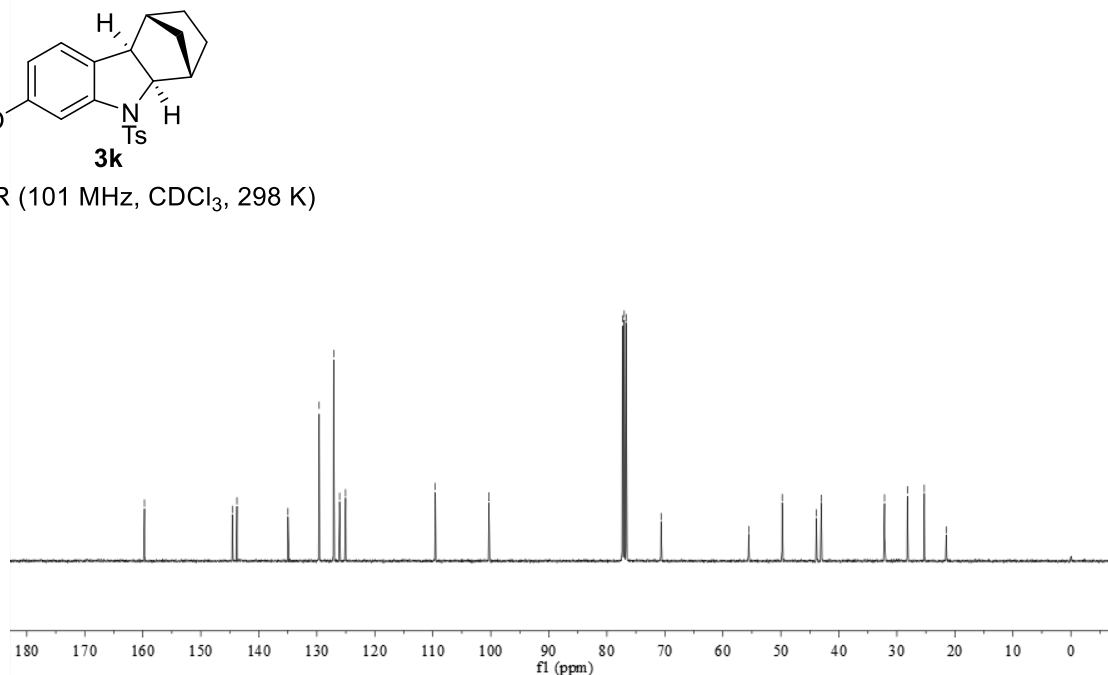



# Supporting Information

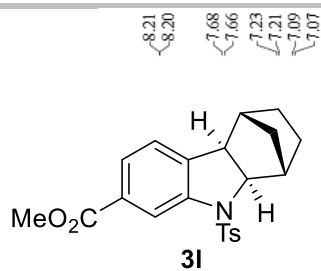

$^1\text{H NMR}$  (400 MHz,  $\text{CDCl}_3$ , 298 K)

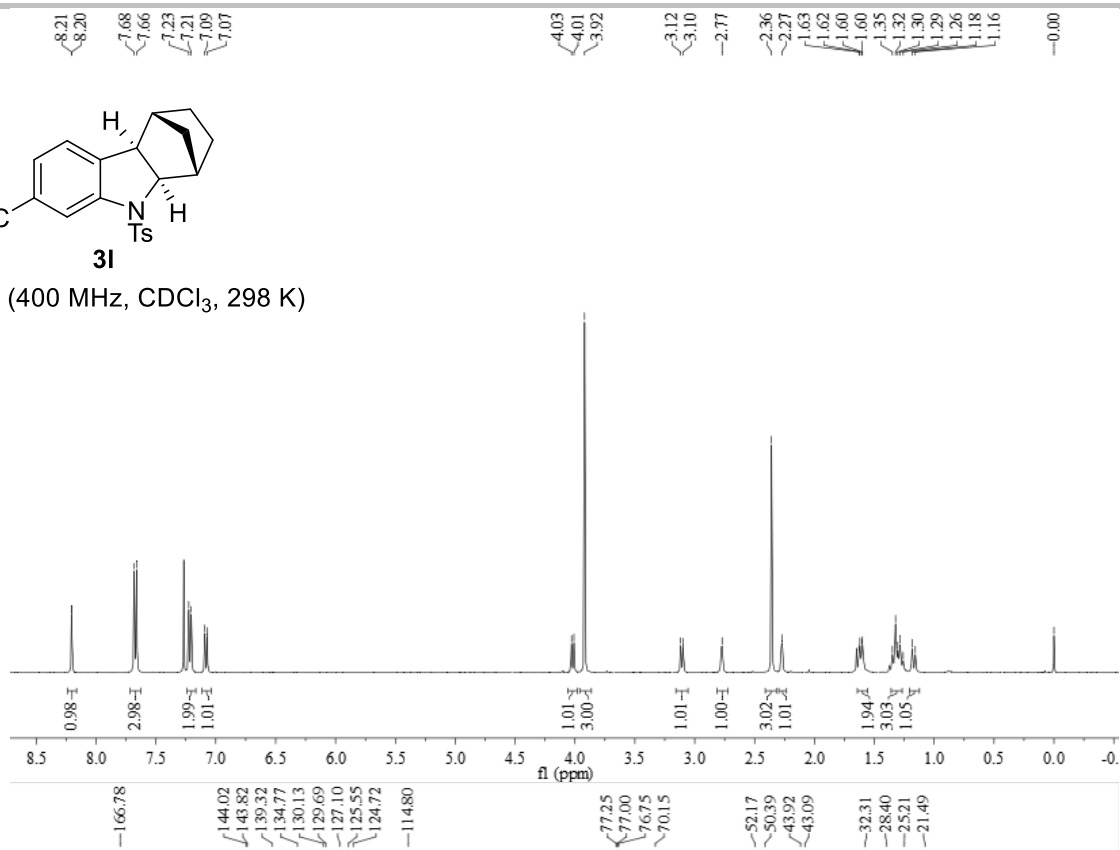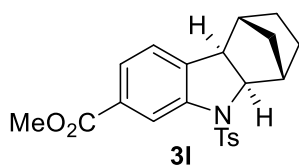

$^{13}\text{C NMR}$  (126 MHz,  $\text{CDCl}_3$ , 298 K)

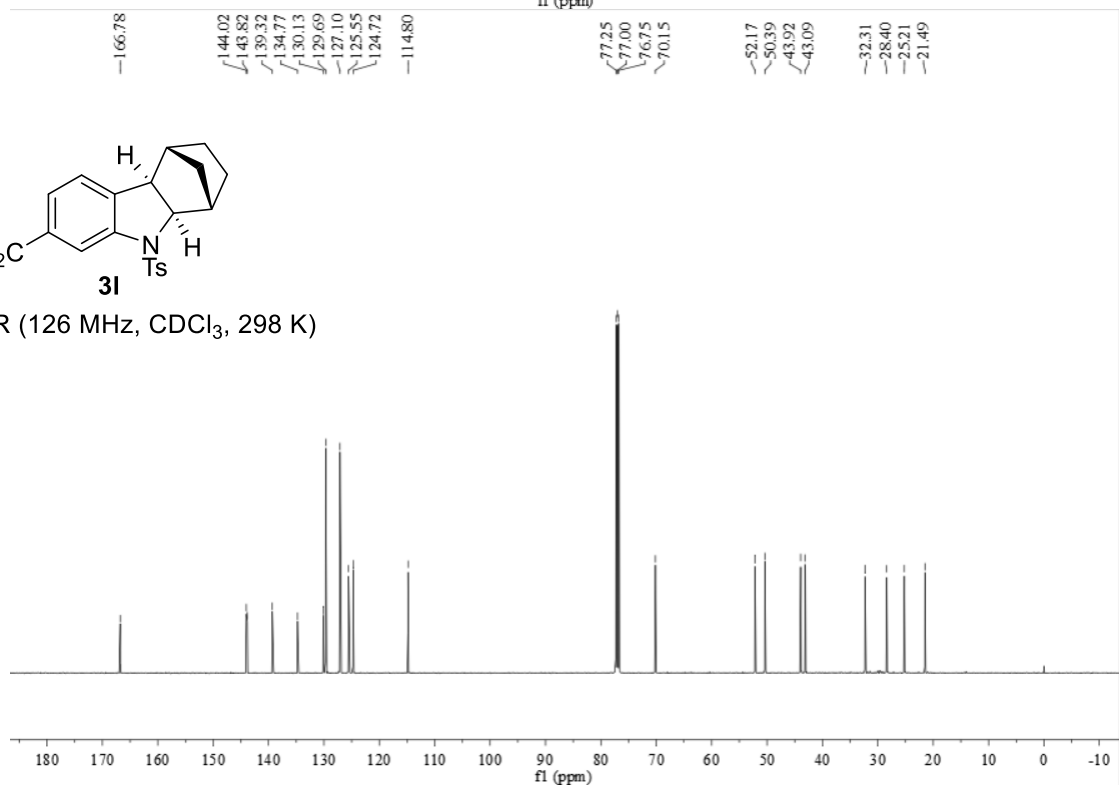

# Supporting Information

7.82  
7.67  
7.65  
7.24  
7.22  
7.20  
7.12  
7.10

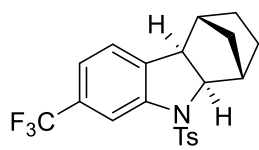

**3m**

$^1H$  NMR (400 MHz,  $CDCl_3$ , 298 K)

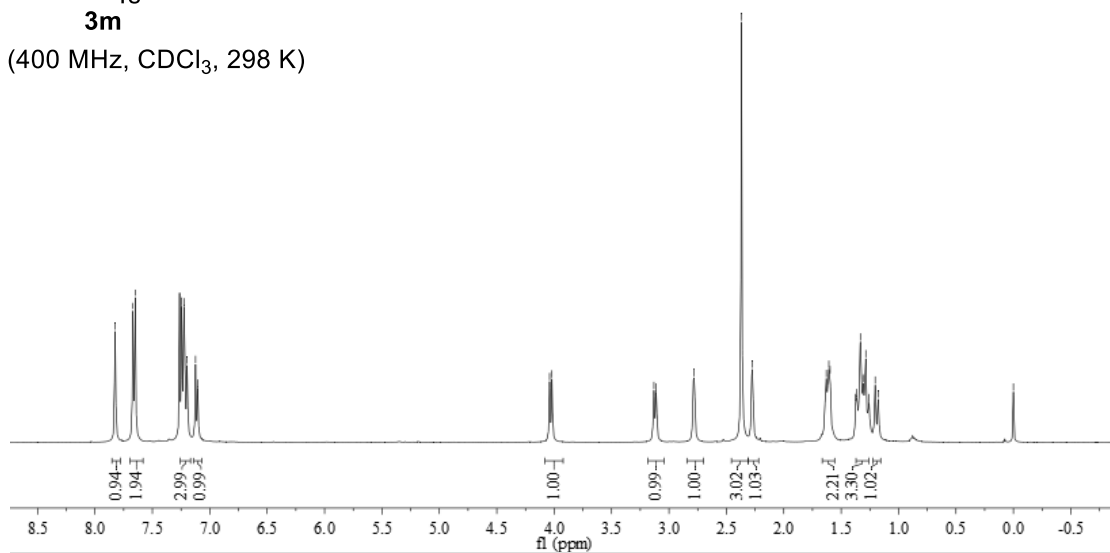

144.27  
143.99  
137.95  
134.54  
130.76  
130.44  
130.12  
129.78  
128.07  
127.05  
125.36  
125.16  
122.65  
120.69  
120.65  
119.95  
110.89  
110.86

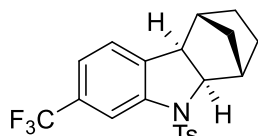

**3m**

$^{13}C$  NMR (101 MHz,  $CDCl_3$ , 298 K)

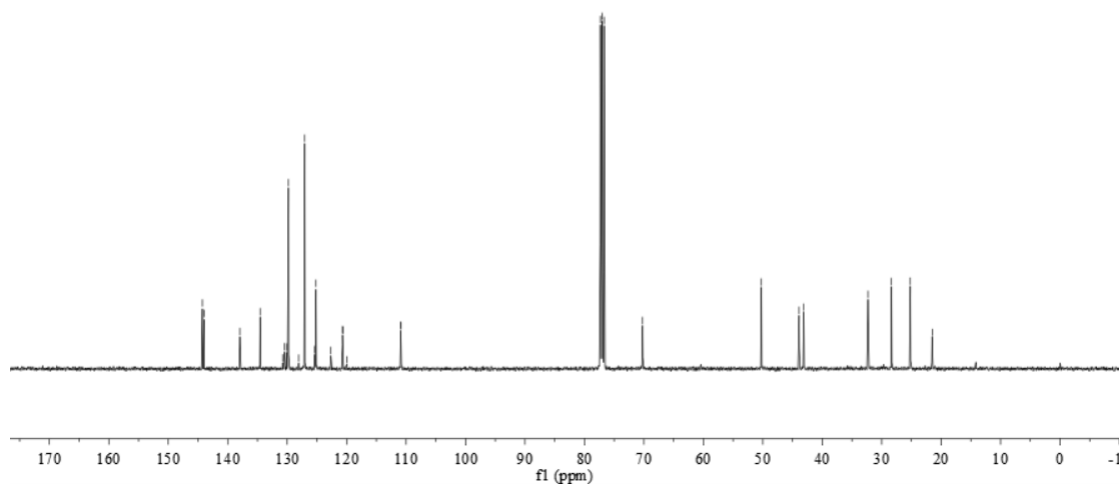

## Supporting Information

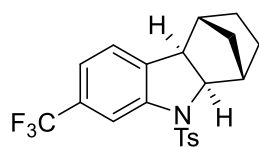

**3m**

<sup>19</sup>F NMR (376 MHz, CDCl<sub>3</sub>, 298 K)

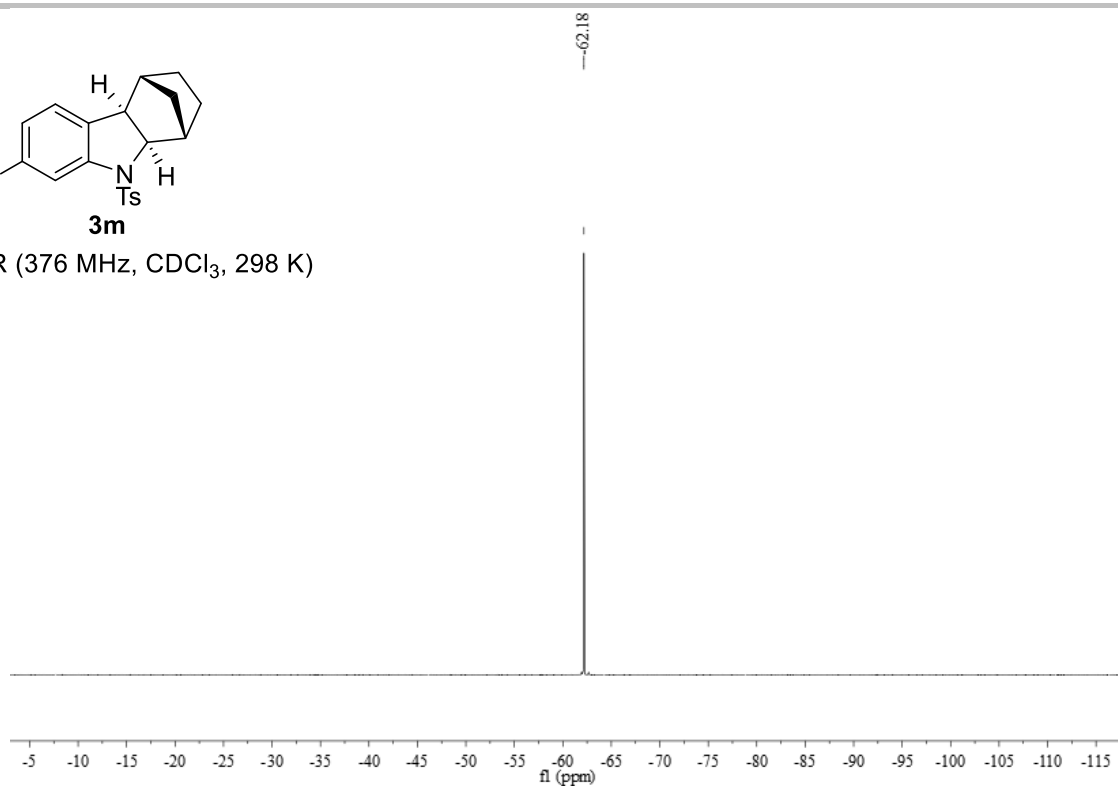

# Supporting Information

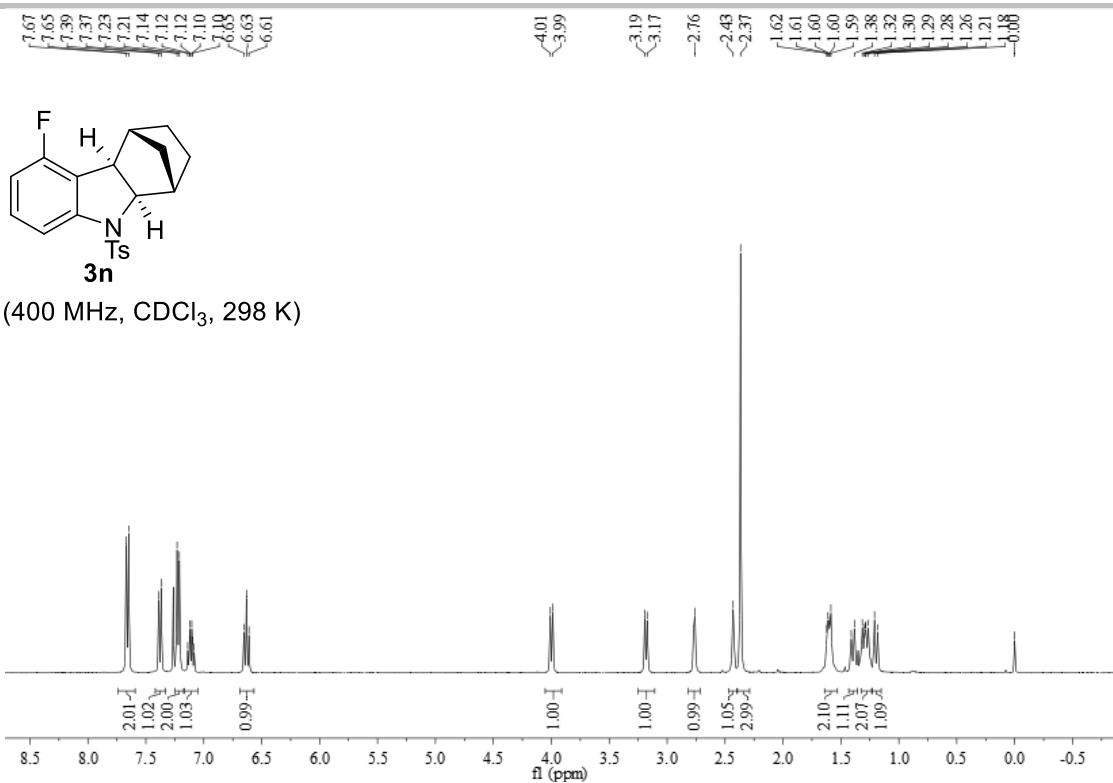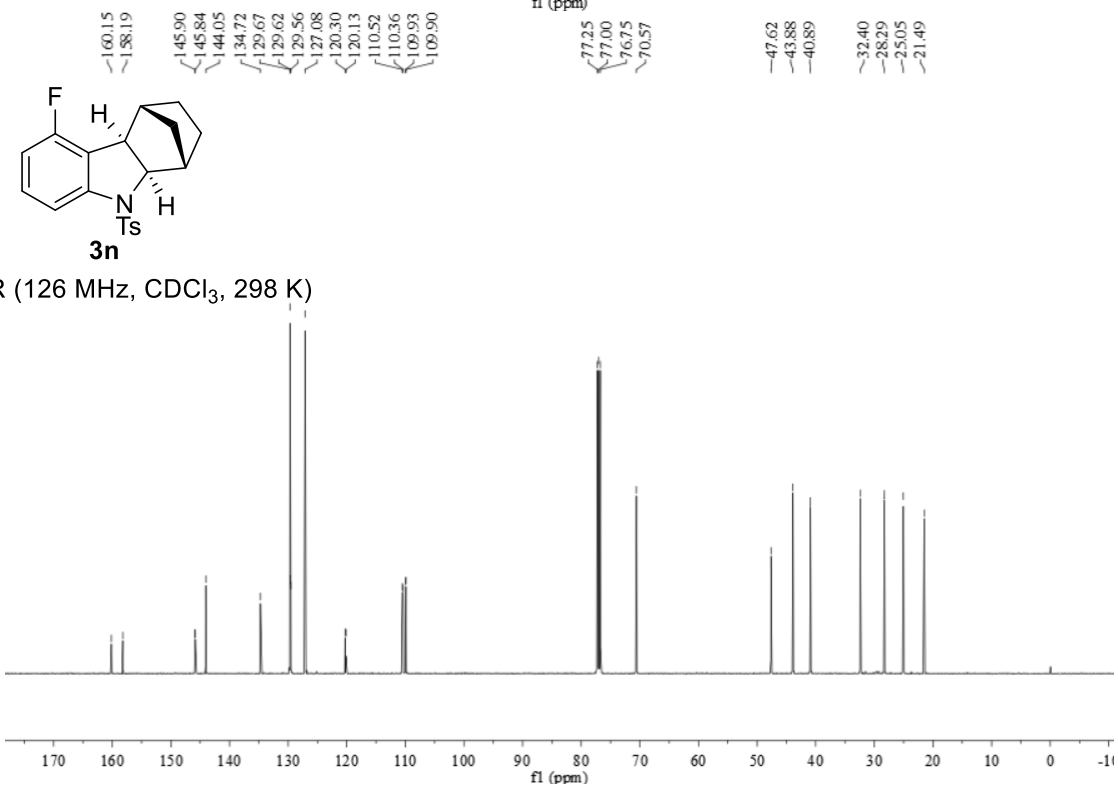

## Supporting Information

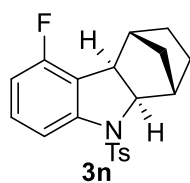

$^{19}\text{F}$  NMR (376 MHz,  $\text{CDCl}_3$ , 298 K)

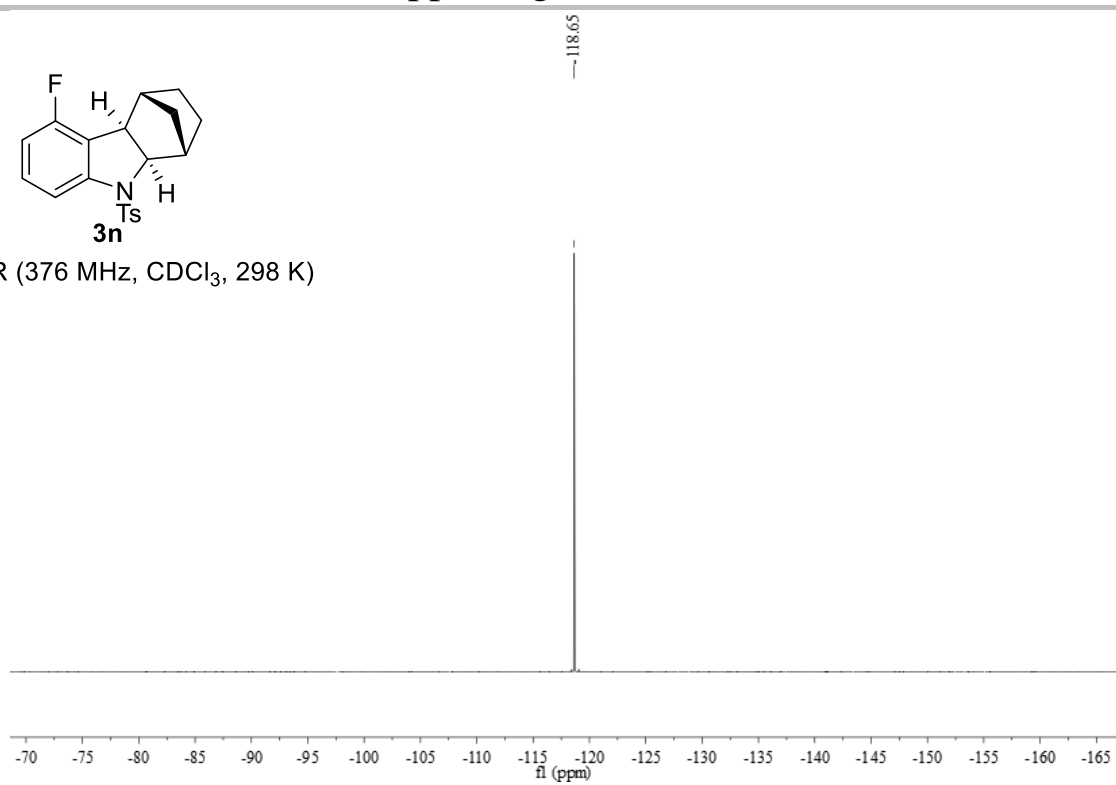

# Supporting Information

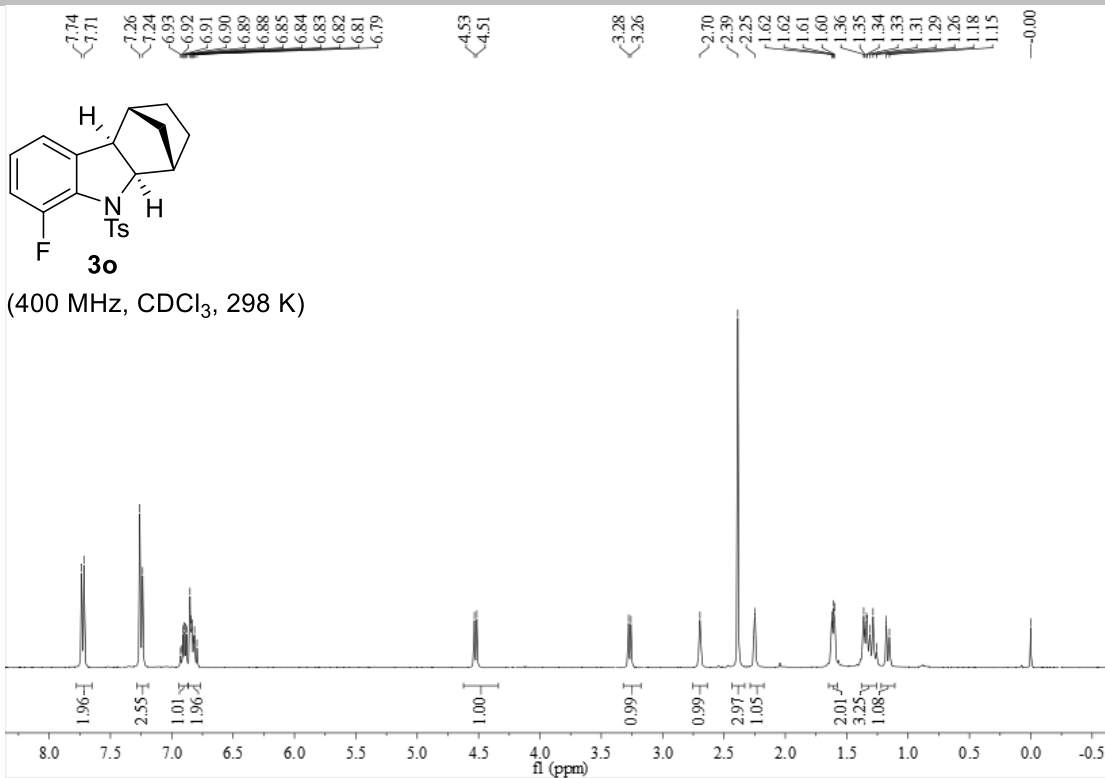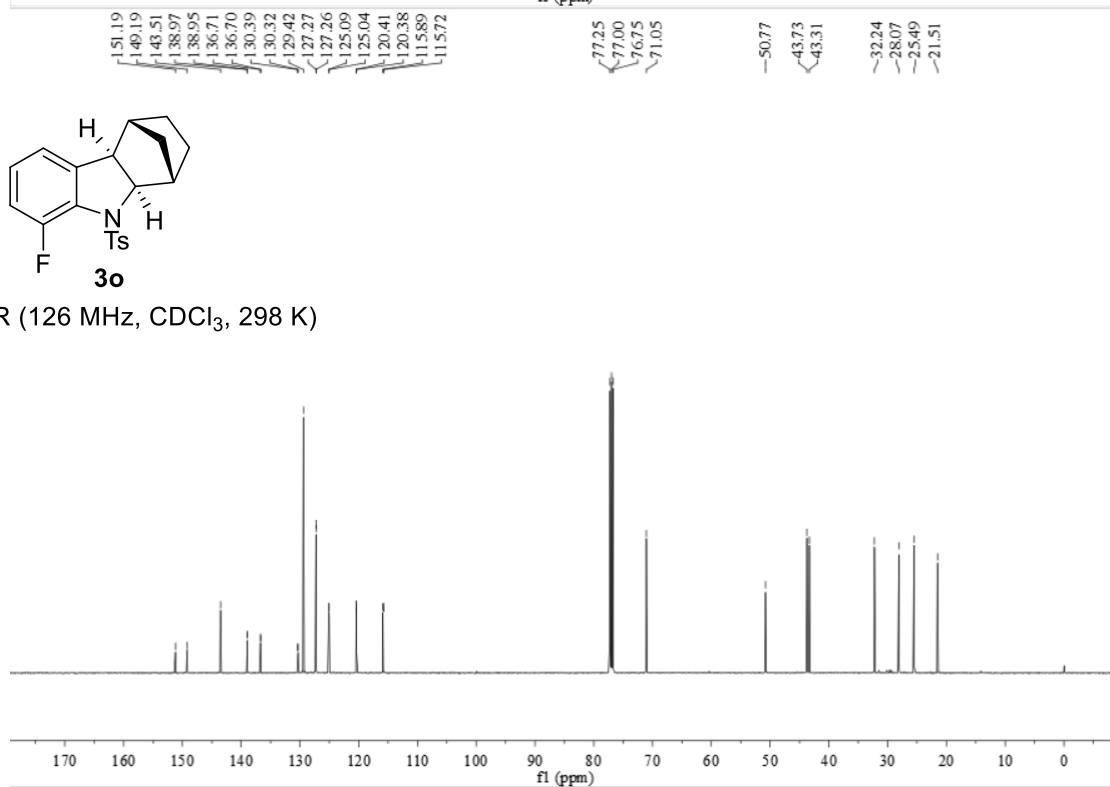

## Supporting Information

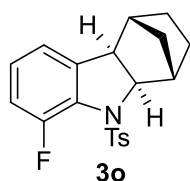

$^{19}\text{F}$  NMR (376 MHz,  $\text{CDCl}_3$ , 298 K)

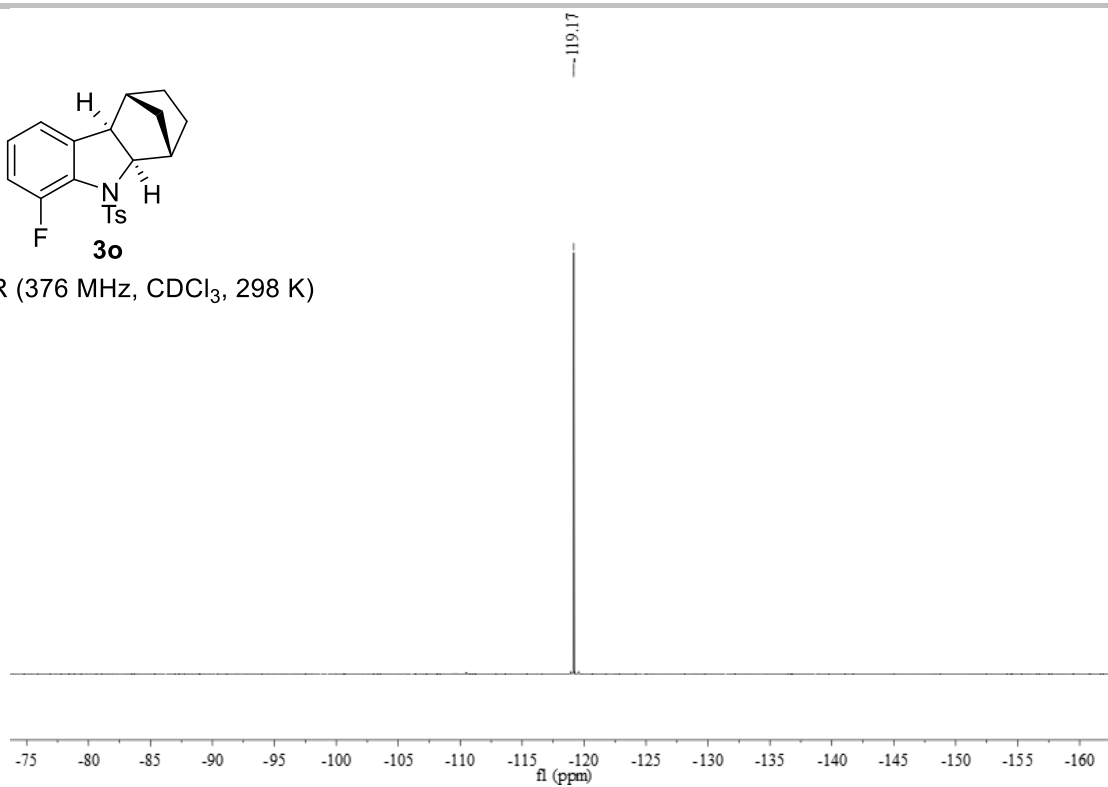

# Supporting Information

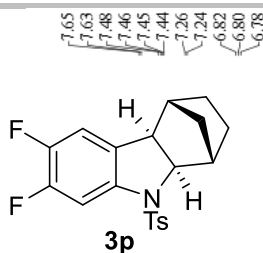

$^1\text{H NMR}$  (400 MHz,  $\text{CDCl}_3$ , 298 K)

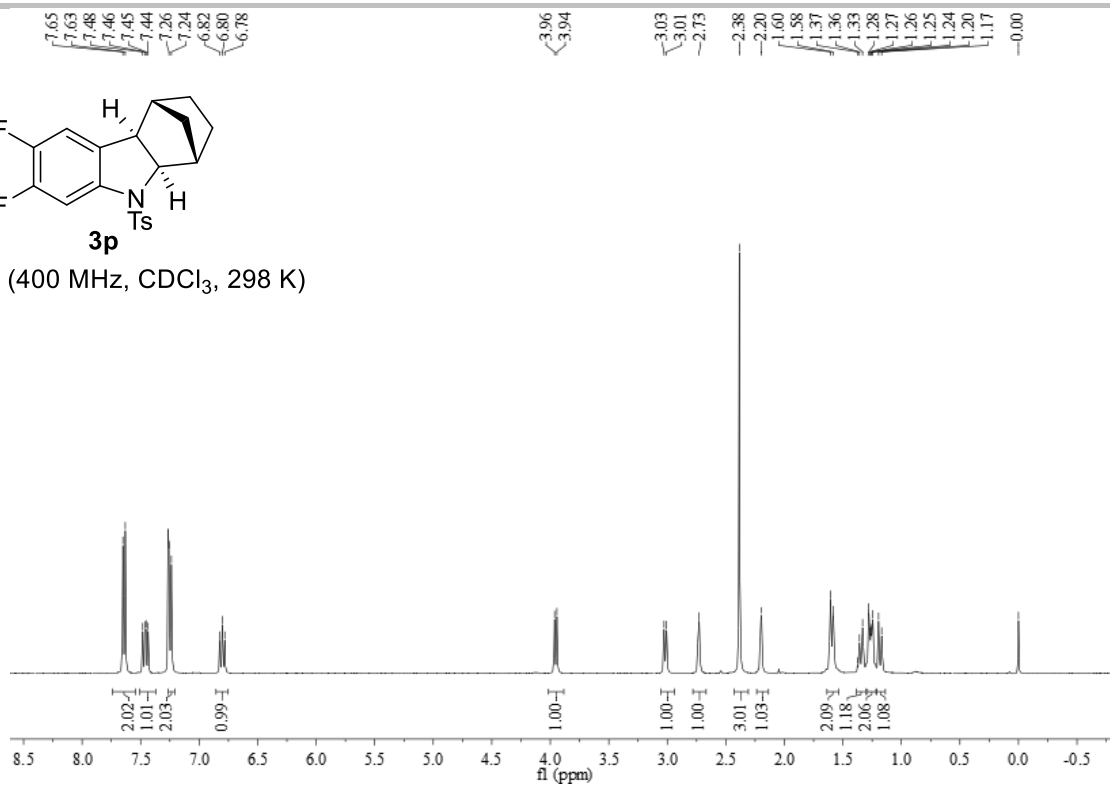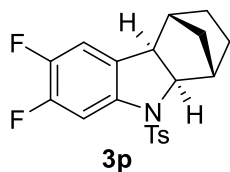

$^{13}\text{C NMR}$  (126 MHz,  $\text{CDCl}_3$ , 298 K)

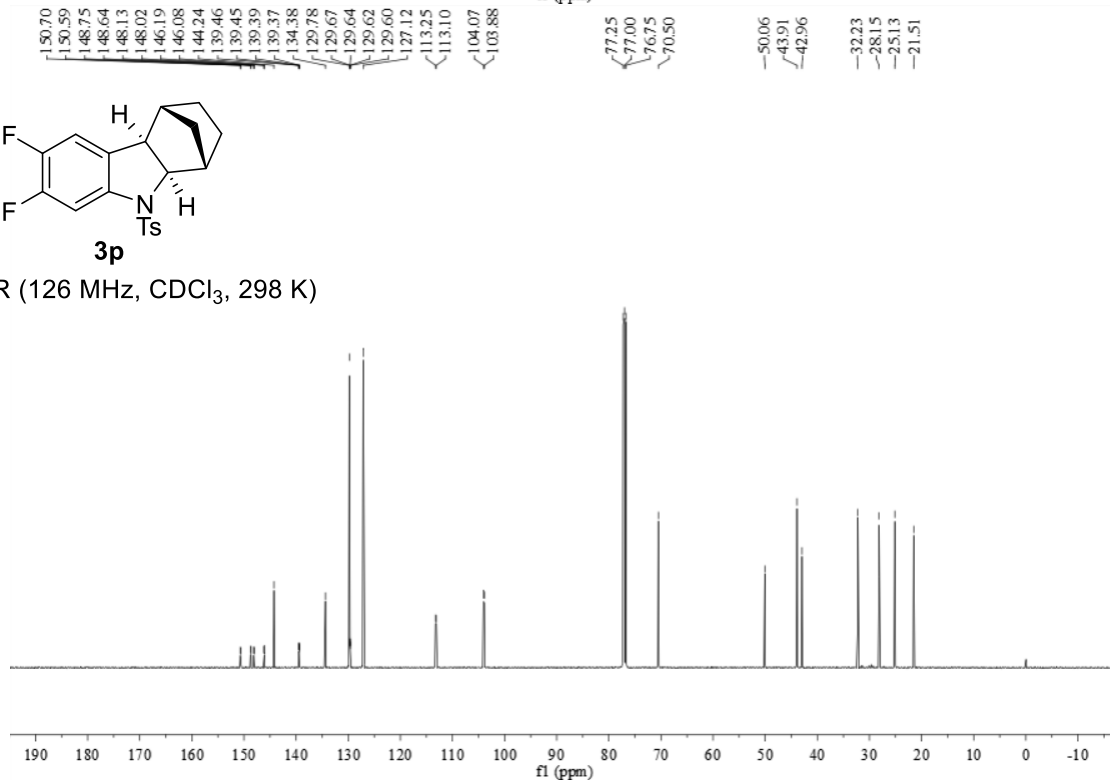



# Supporting Information

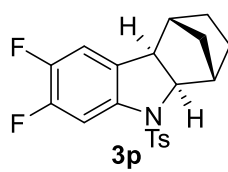

$^{19}\text{F}$  NMR (376 MHz,  $\text{CDCl}_3$ , 298 K)

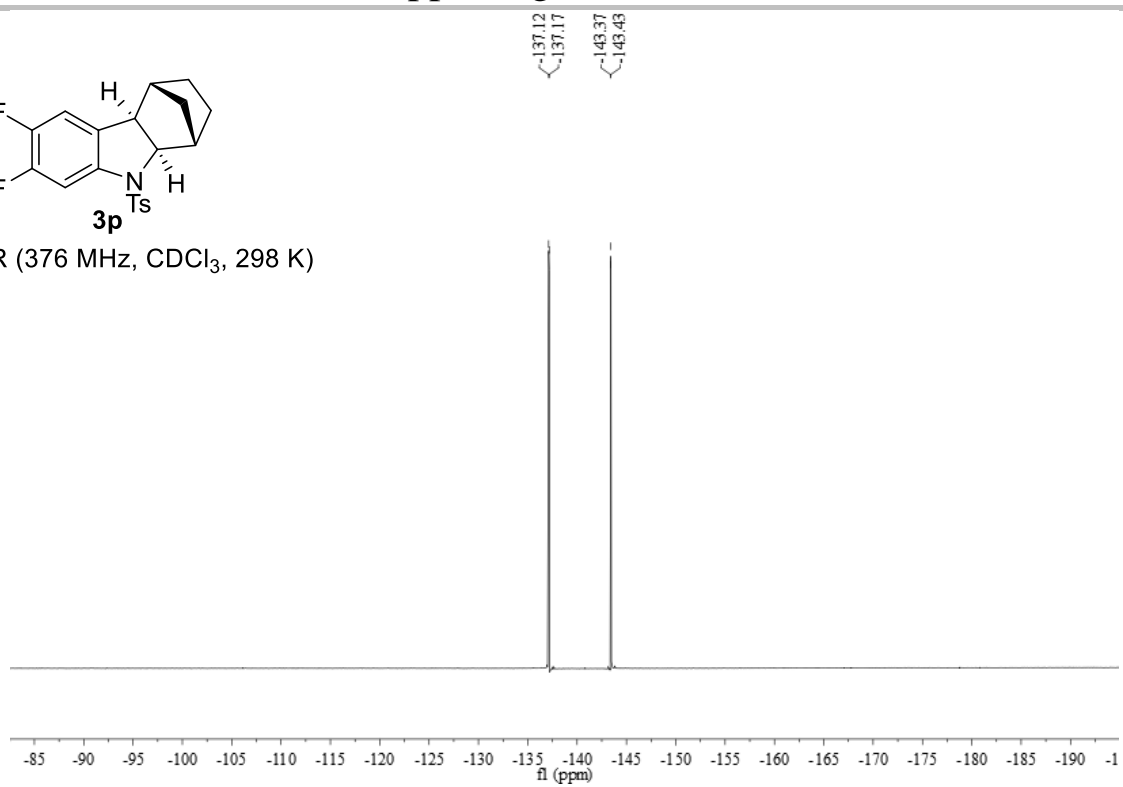

# Supporting Information

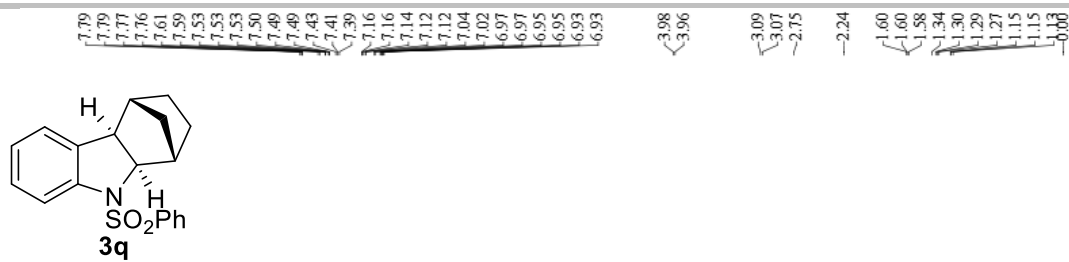

$^1\text{H}$  NMR (400 MHz,  $\text{CDCl}_3$ , 298 K)

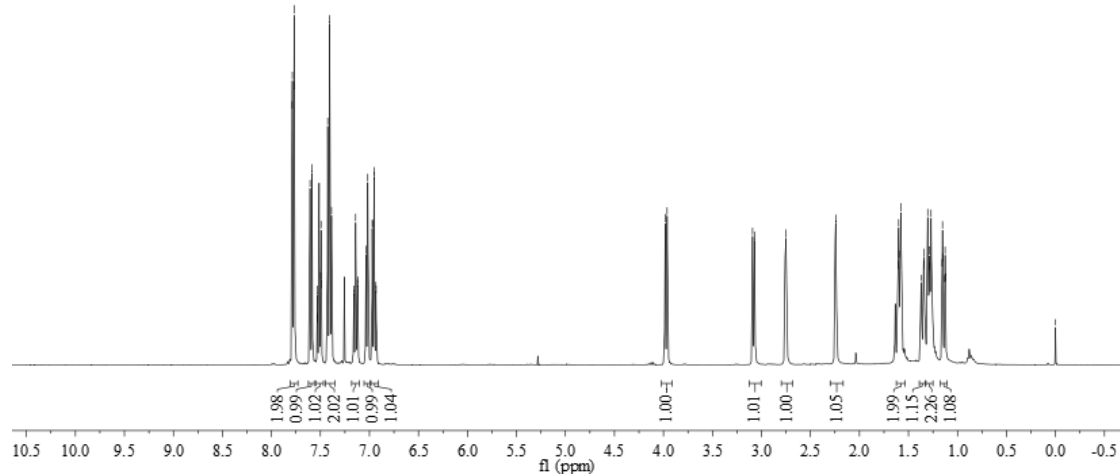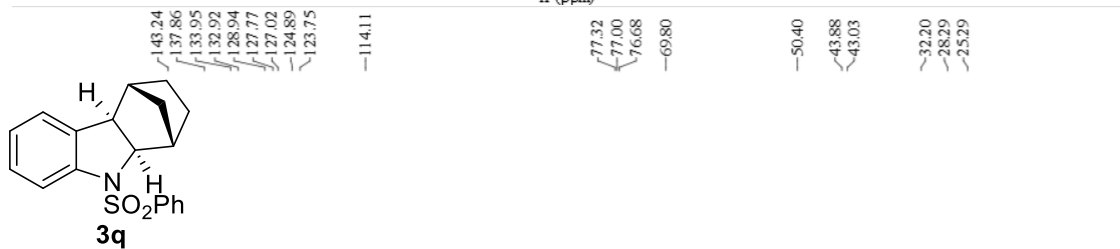

$^{13}\text{C}$  NMR (101 MHz,  $\text{CDCl}_3$ , 298 K)

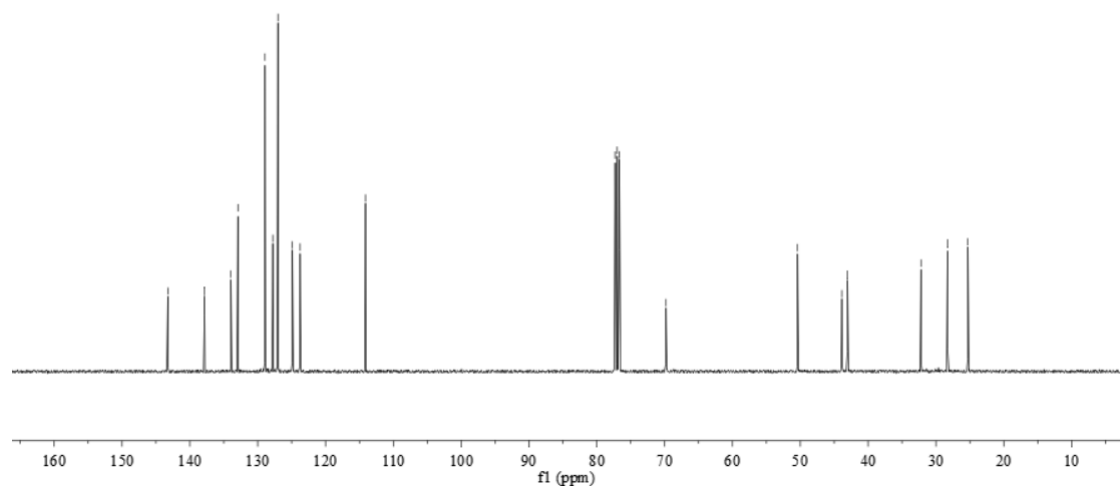

# Supporting Information

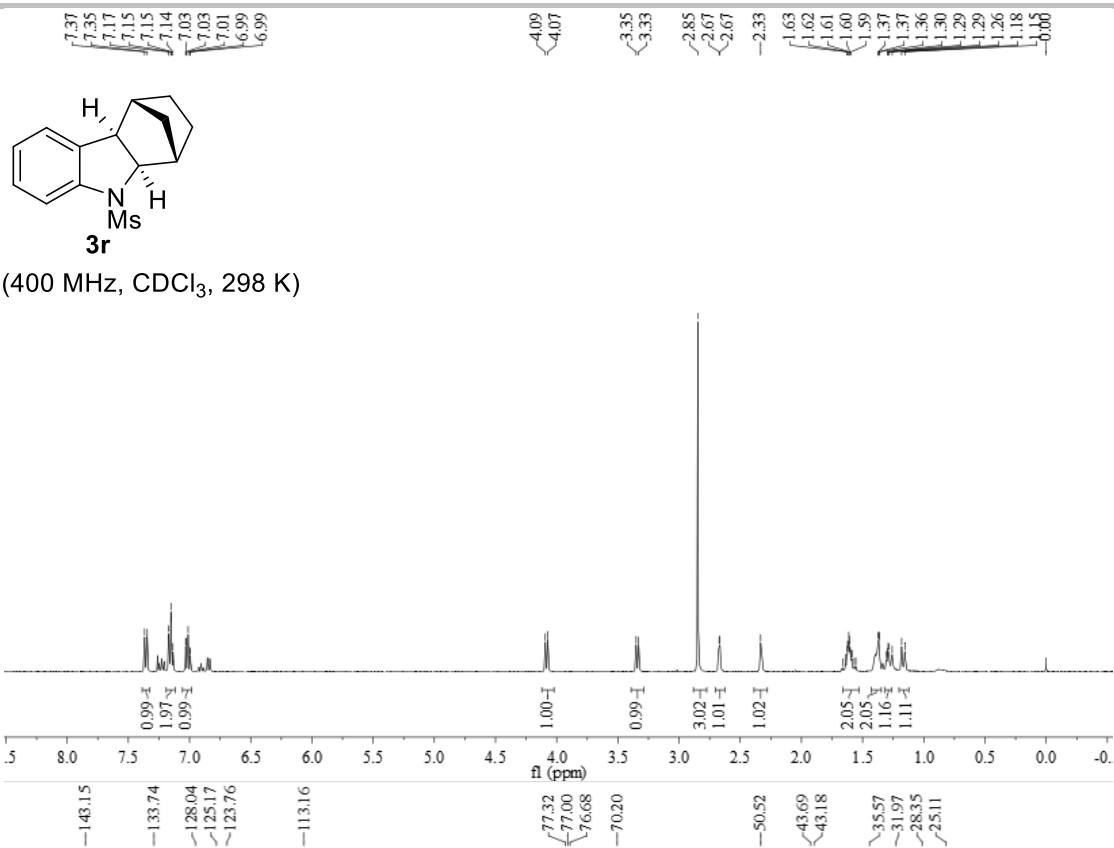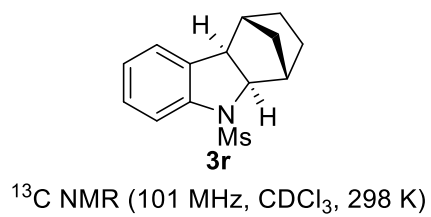

# Supporting Information

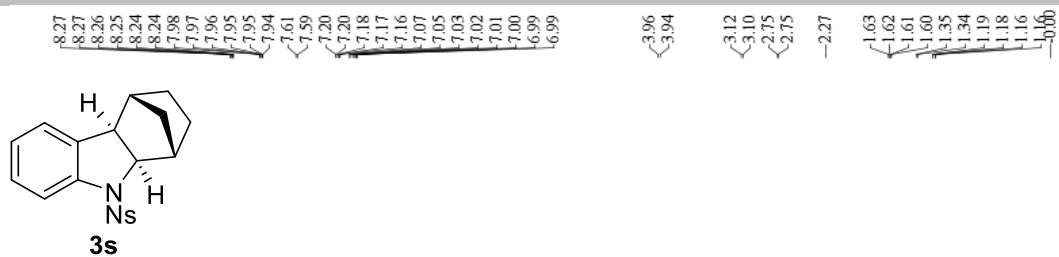

<sup>1</sup>H NMR (400 MHz, CDCl<sub>3</sub>, 298 K)

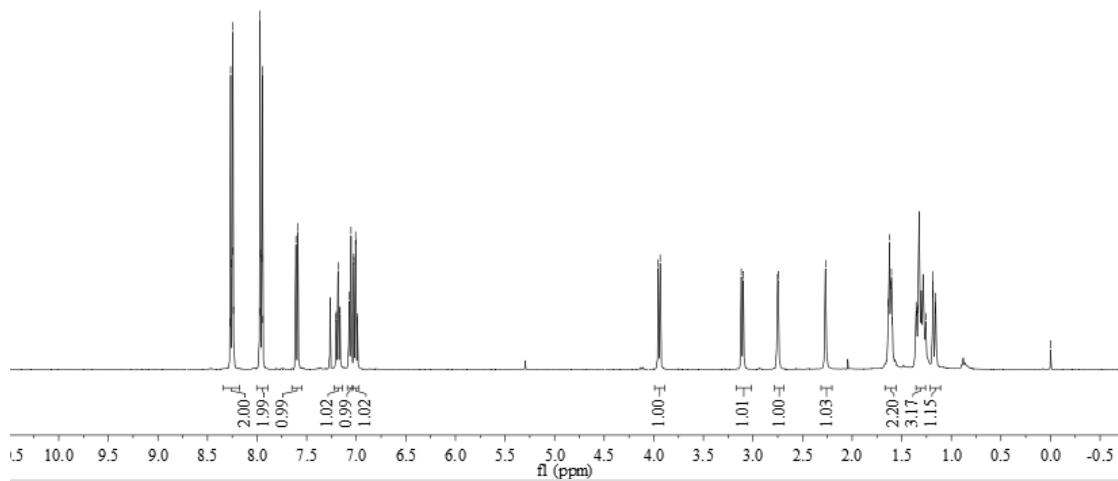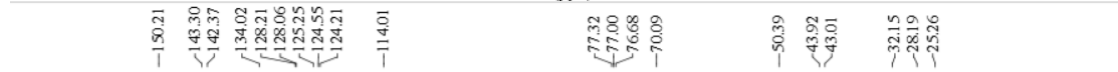

<sup>13</sup>C NMR (101 MHz, CDCl<sub>3</sub>, 298 K)

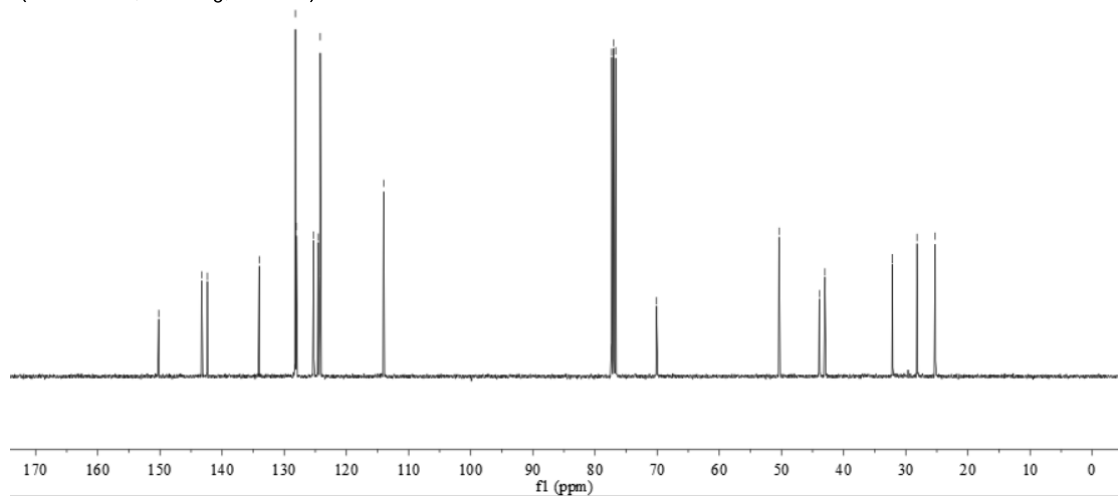

# Supporting Information

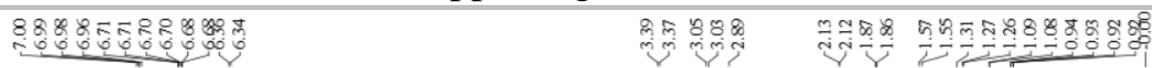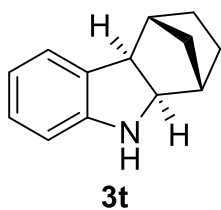

$^1\text{H}$  NMR (500 MHz,  $\text{C}_6\text{D}_6$ , 298 K)

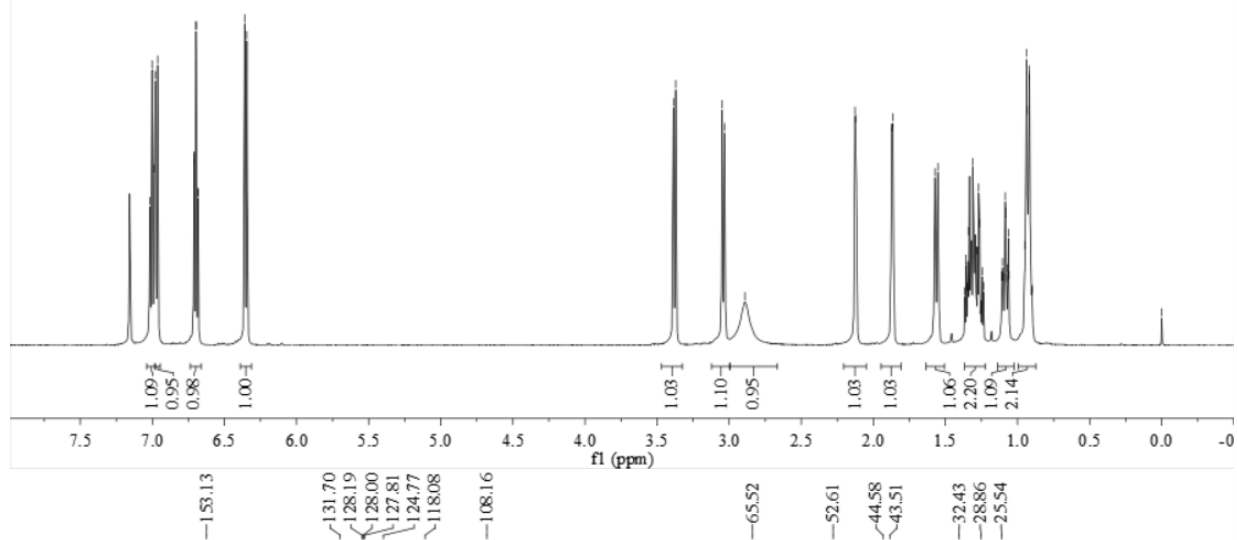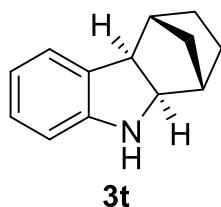

$^{13}\text{C}$  NMR (126 MHz,  $\text{C}_6\text{D}_6$ , 298 K)

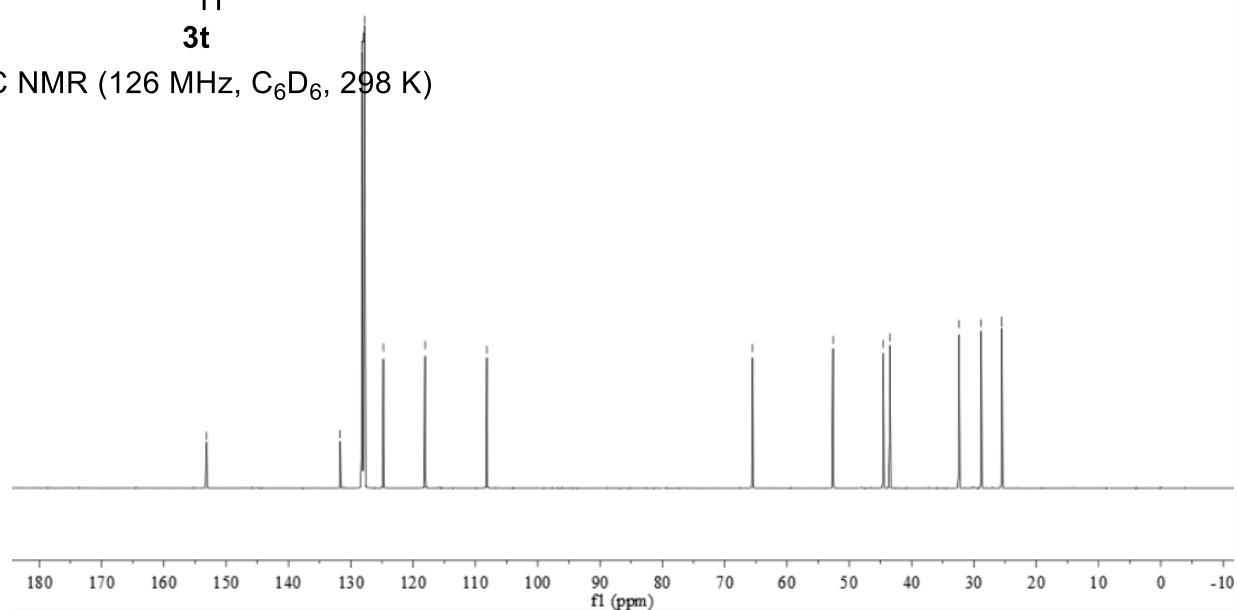

# Supporting Information

7.11  
7.09  
7.08  
6.98  
6.97  
6.70  
6.69  
6.68  
6.67  
6.66  
6.20  
6.19

3.18  
3.16  
3.03  
3.01  
2.44  
2.15  
2.10  
2.10  
1.56  
1.54  
1.33  
1.31  
1.08  
0.94  
0.94  
0.92  
0.90  
0.88

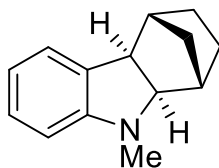

**3u**

$^1\text{H}$  NMR (500 MHz,  $\text{C}_6\text{D}_6$ , 298 K)

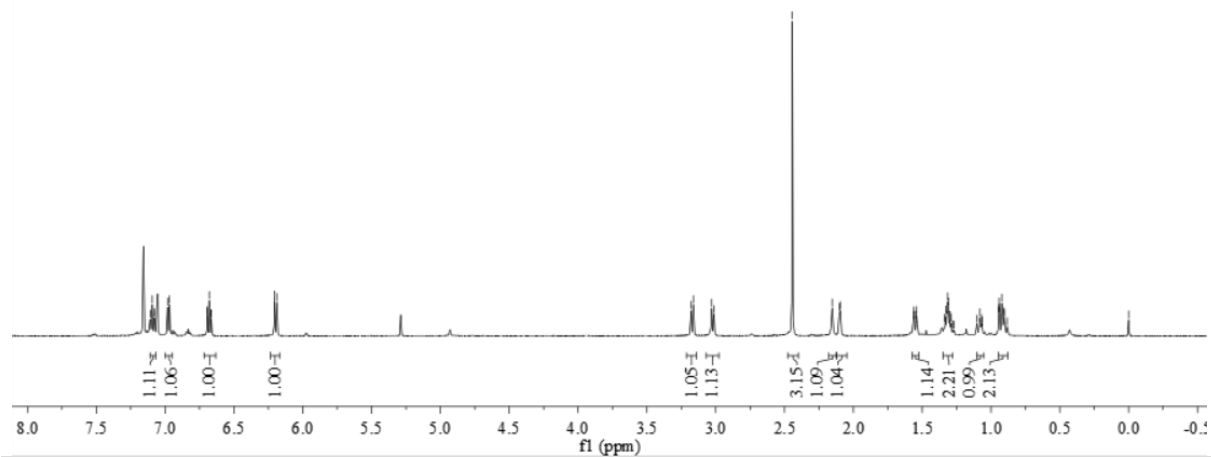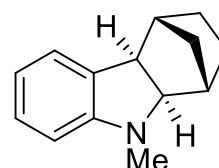

**3u**

$^{13}\text{C}$  NMR (126 MHz,  $\text{C}_6\text{D}_6$ , 298 K)

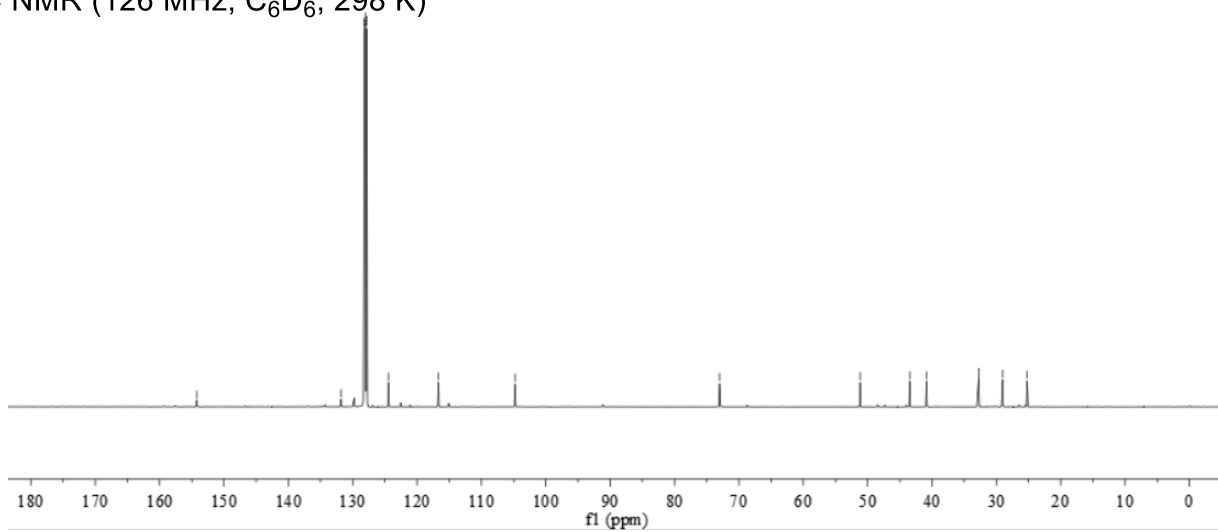

# Supporting Information

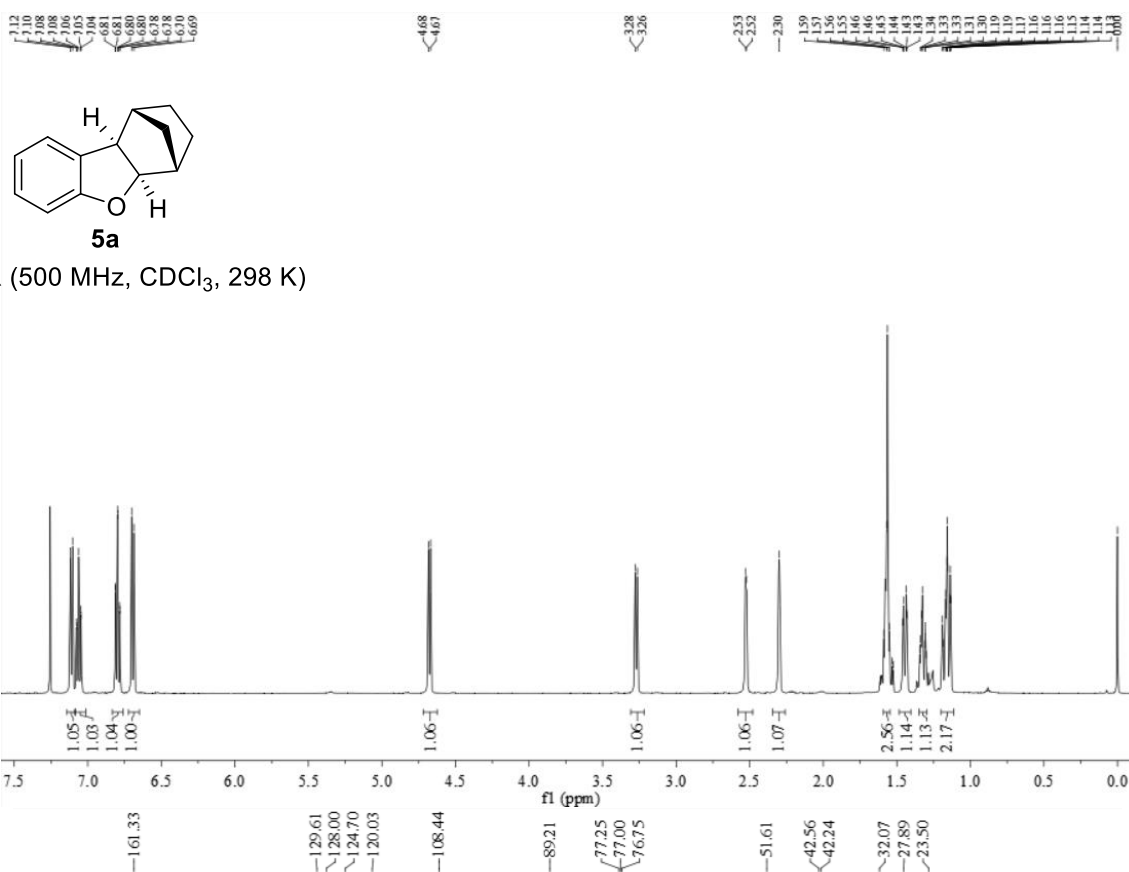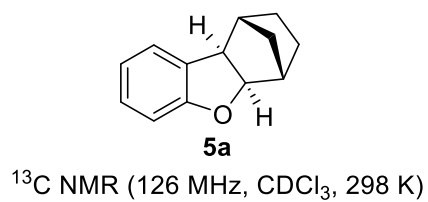

# Supporting Information

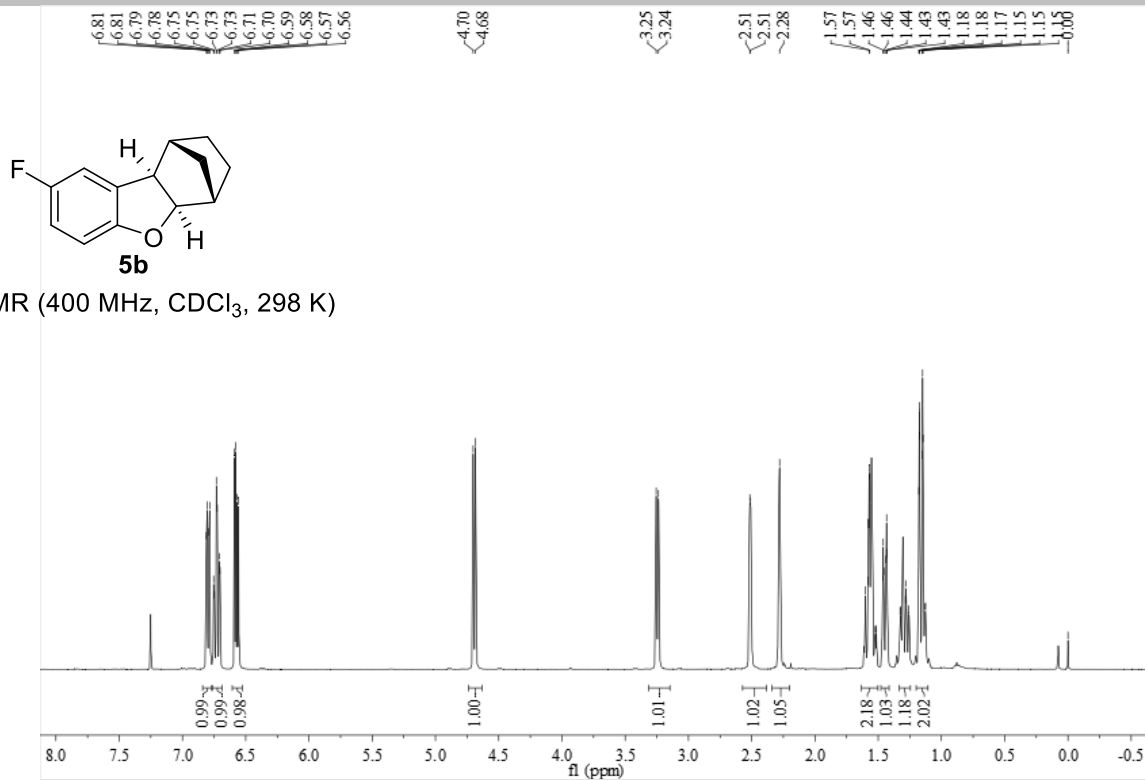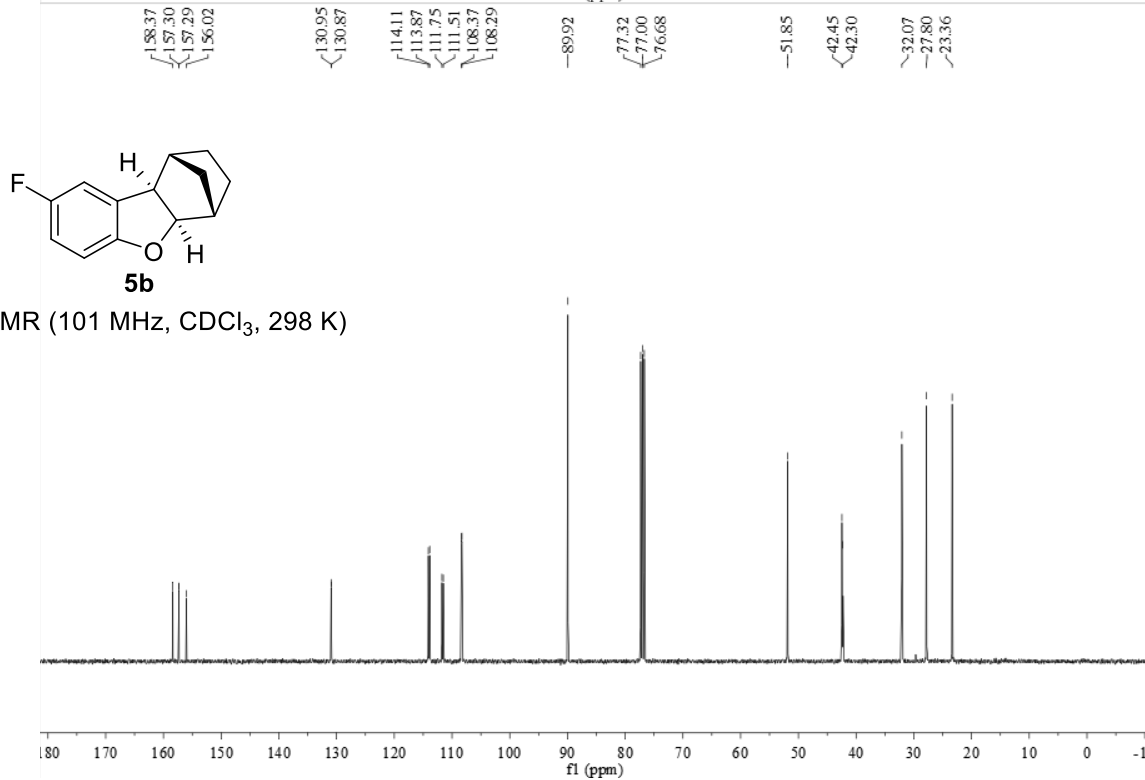



# Supporting Information

-125.25

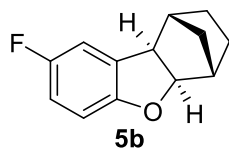

<sup>19</sup>F NMR (376 MHz, CDCl<sub>3</sub>, 298 K)

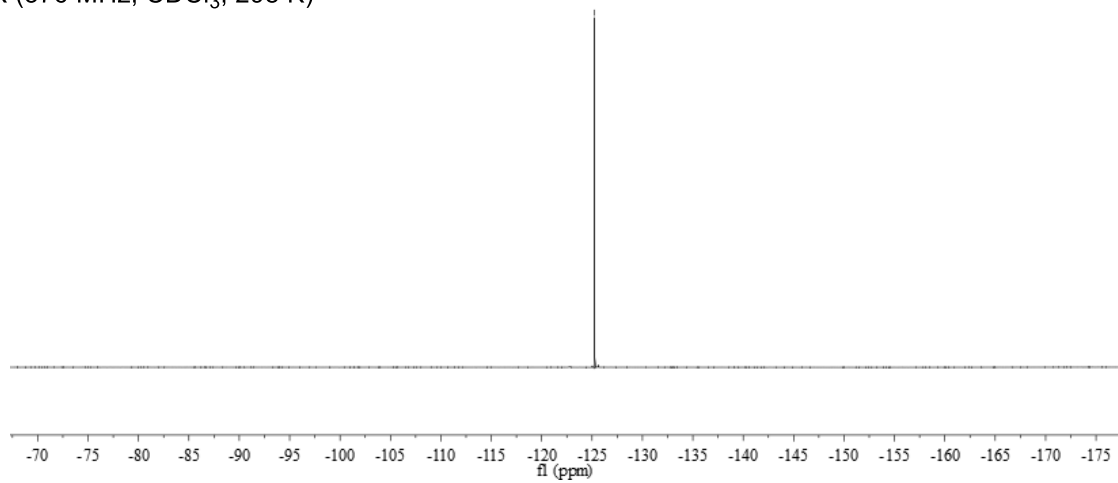

# Supporting Information

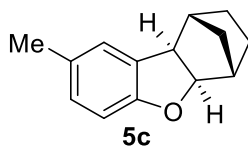

$^1\text{H}$  NMR (500 MHz,  $\text{CDCl}_3$ , 298 K)

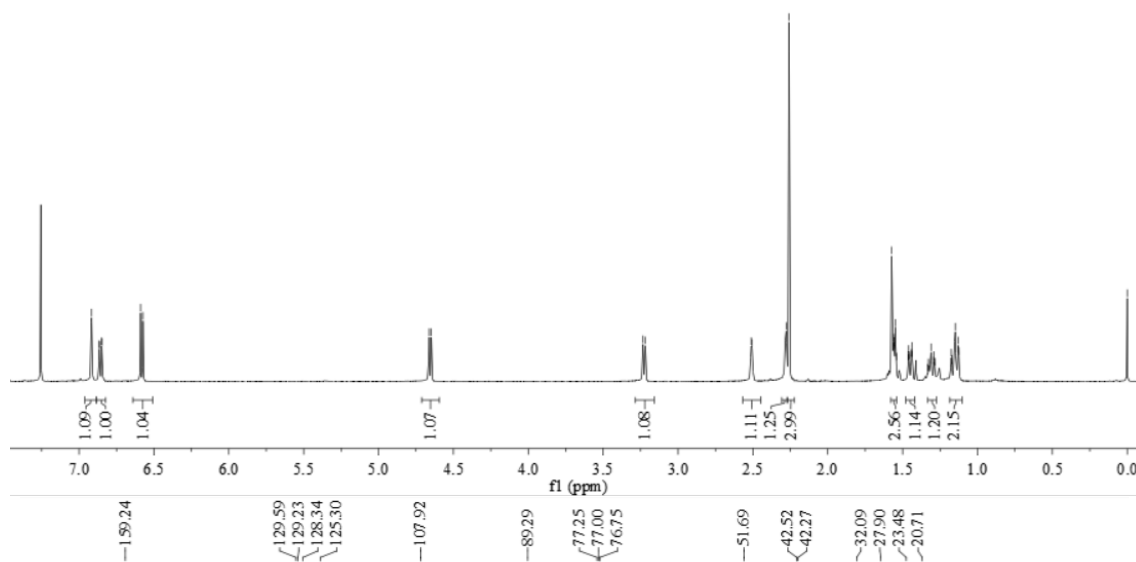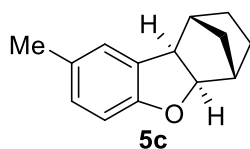

$^{13}\text{C}$  NMR (126 MHz,  $\text{CDCl}_3$ , 298 K)

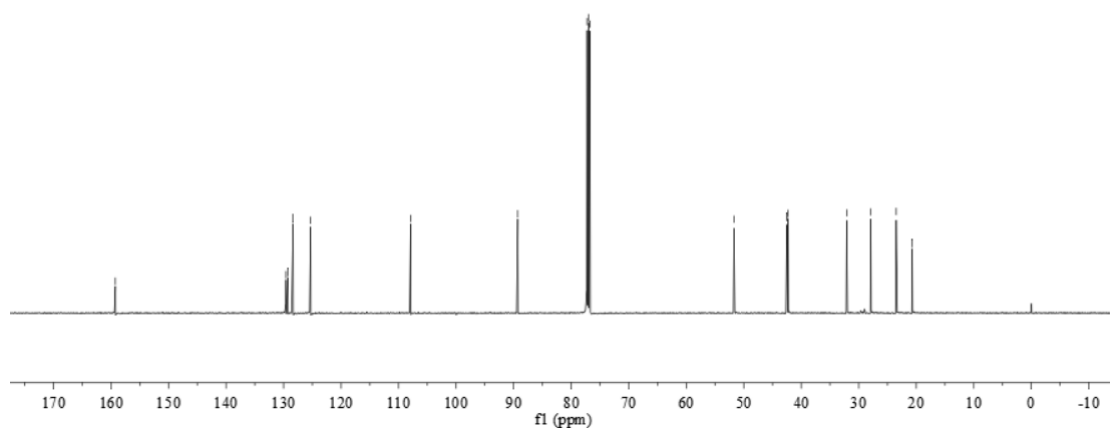

# Supporting Information

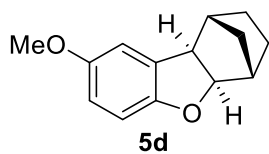

<sup>1</sup>H NMR (500 MHz, CDCl<sub>3</sub>, 298 K)

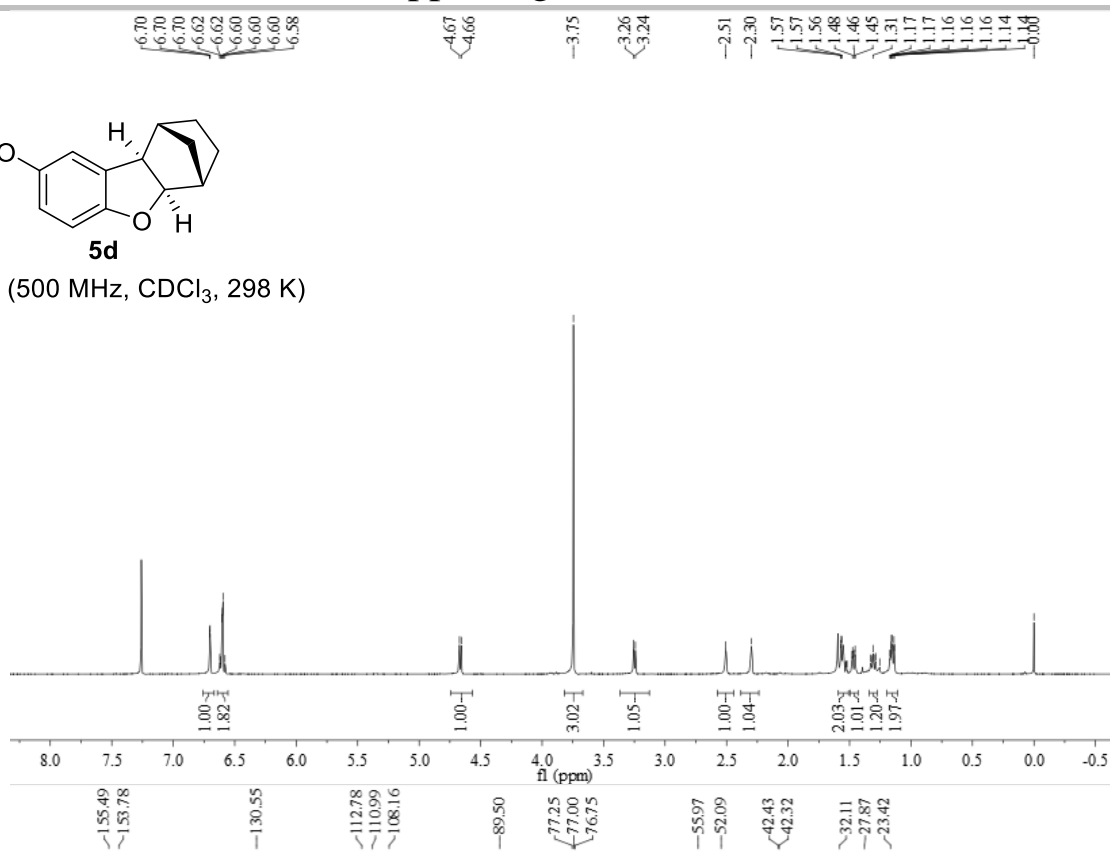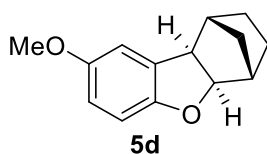

<sup>13</sup>C NMR (126 MHz, CDCl<sub>3</sub>, 298 K)

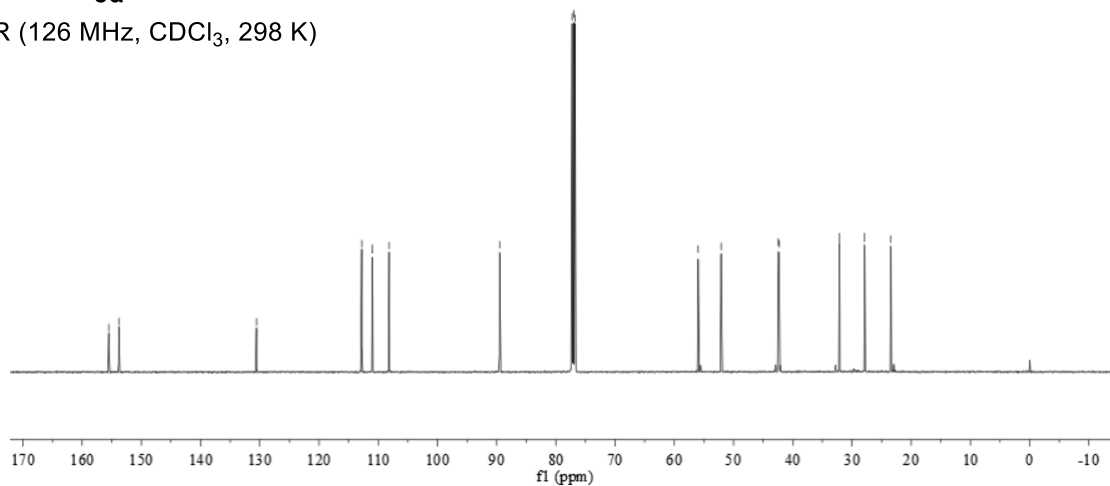

# Supporting Information

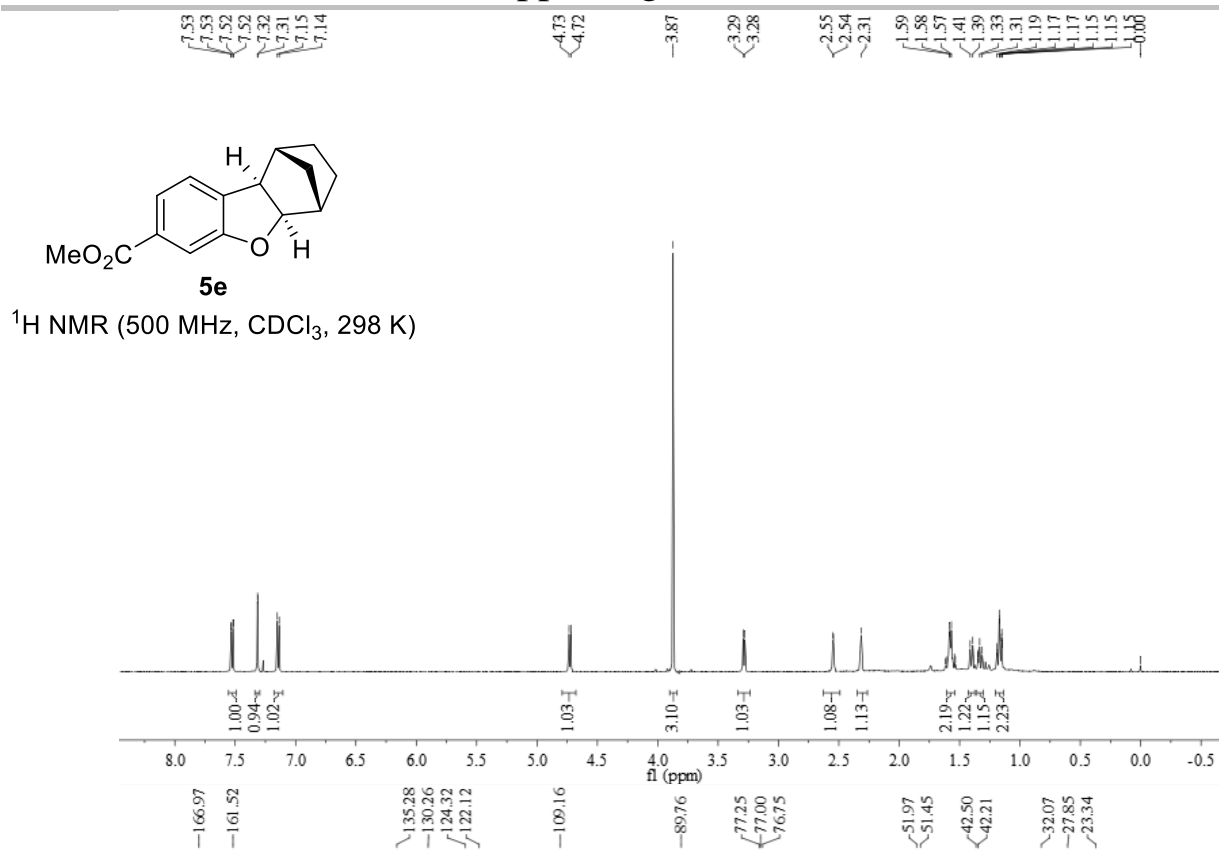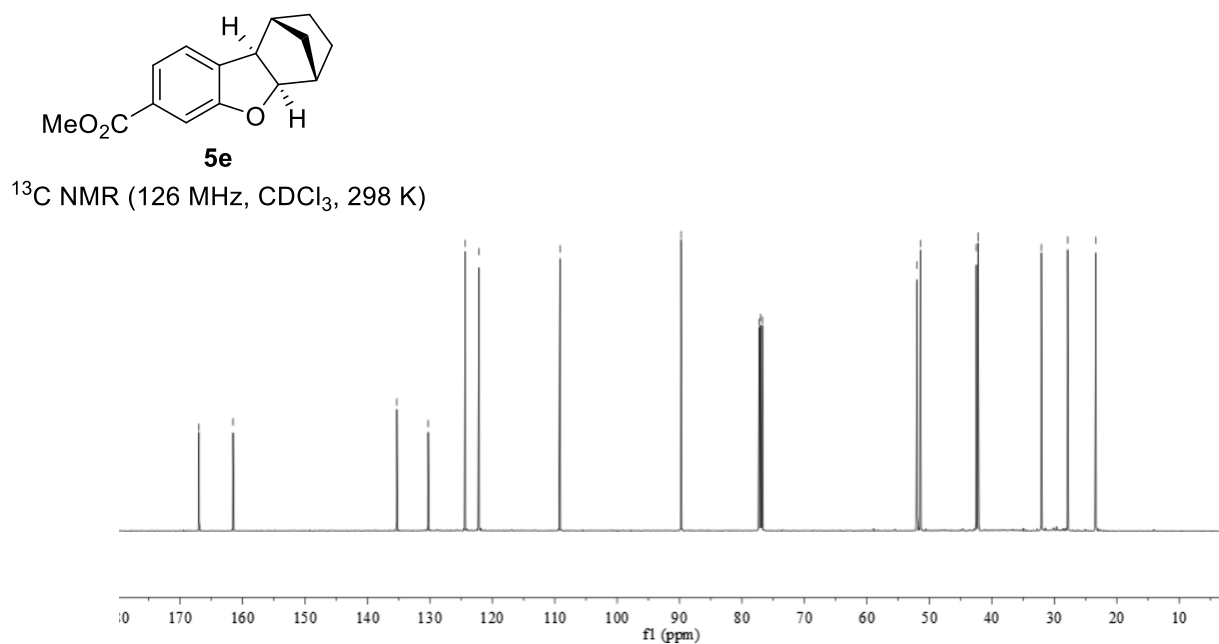

# Supporting Information

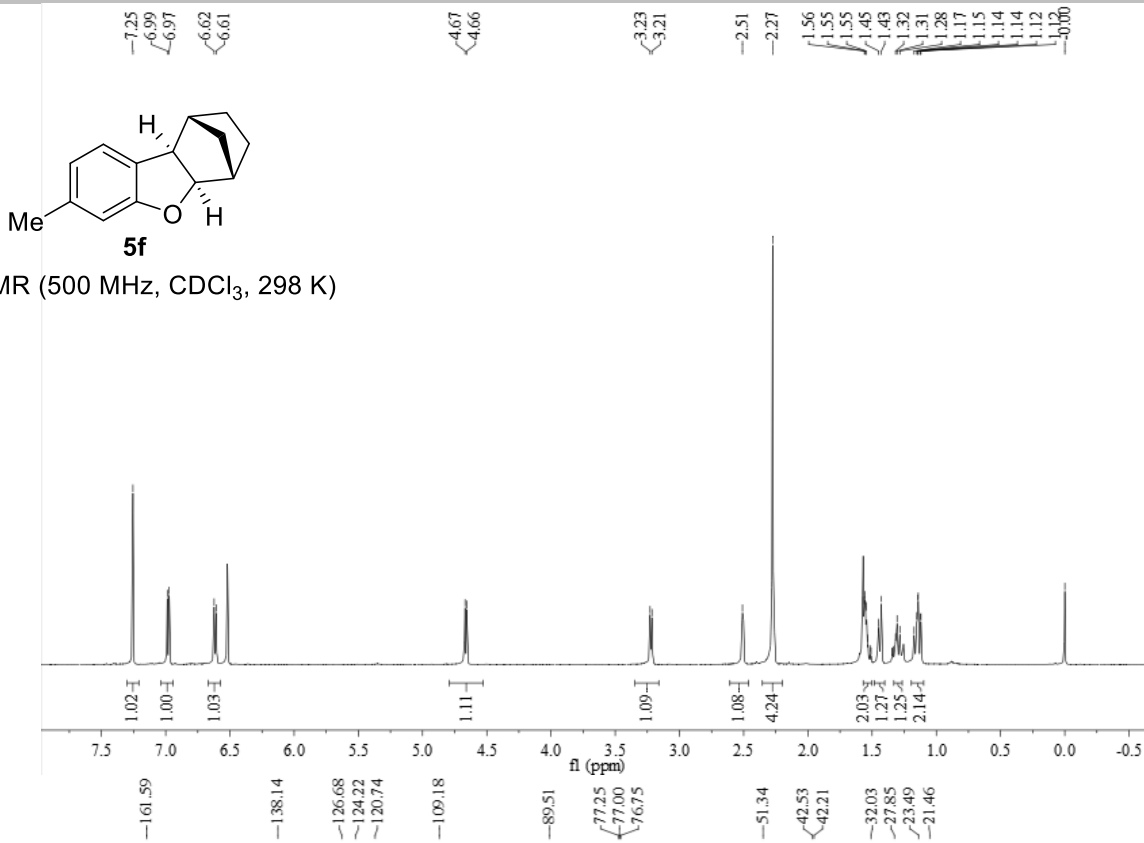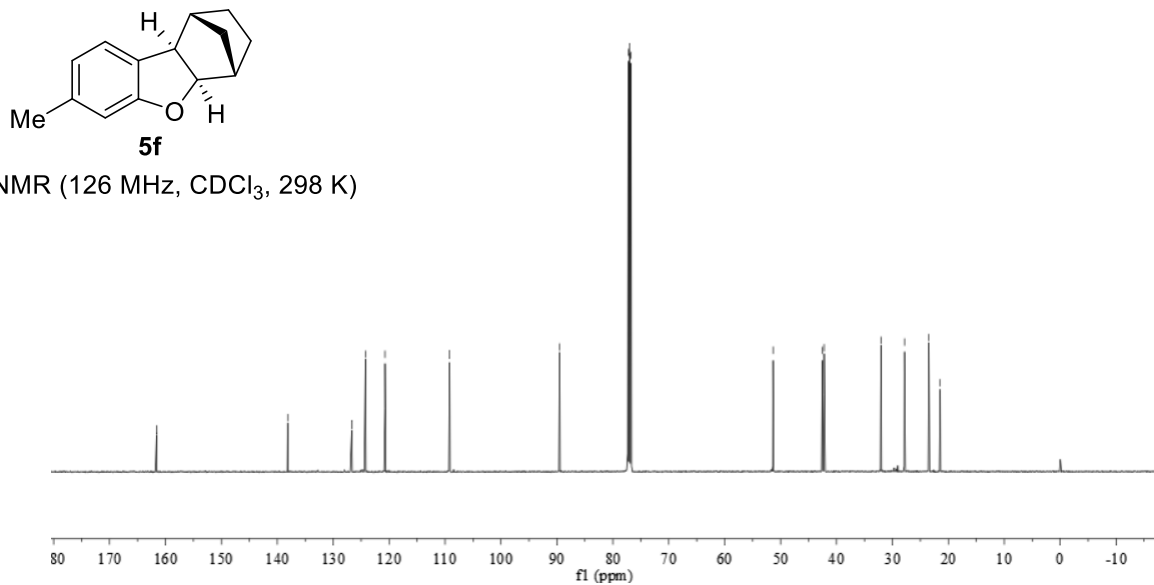

# Supporting Information

7.05 7.03 7.02 6.98 6.97 6.74 6.74 6.72 6.72 6.71 6.37 6.35 6.05 6.05 6.04 6.04 5.83 5.82 5.81 3.56 3.54 3.24 3.23 2.88 2.70 2.48 1.67 1.66 1.42 1.42 1.41 1.40 1.40 1.40

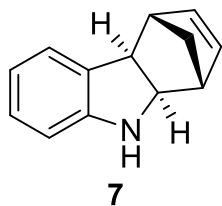

$^1\text{H}$  NMR (500 MHz,  $\text{C}_6\text{D}_6$ , 298 K)

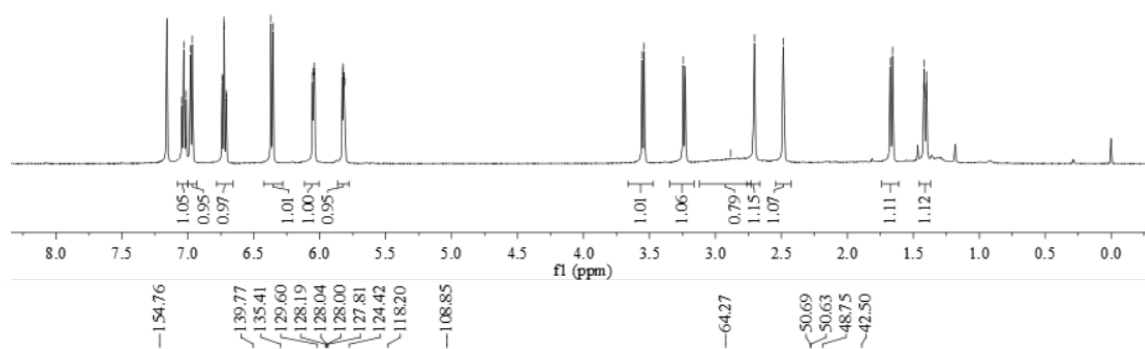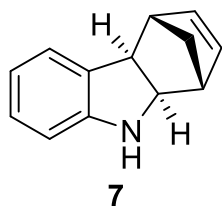

$^{13}\text{C}$  NMR (126 MHz,  $\text{C}_6\text{D}_6$ , 298 K)

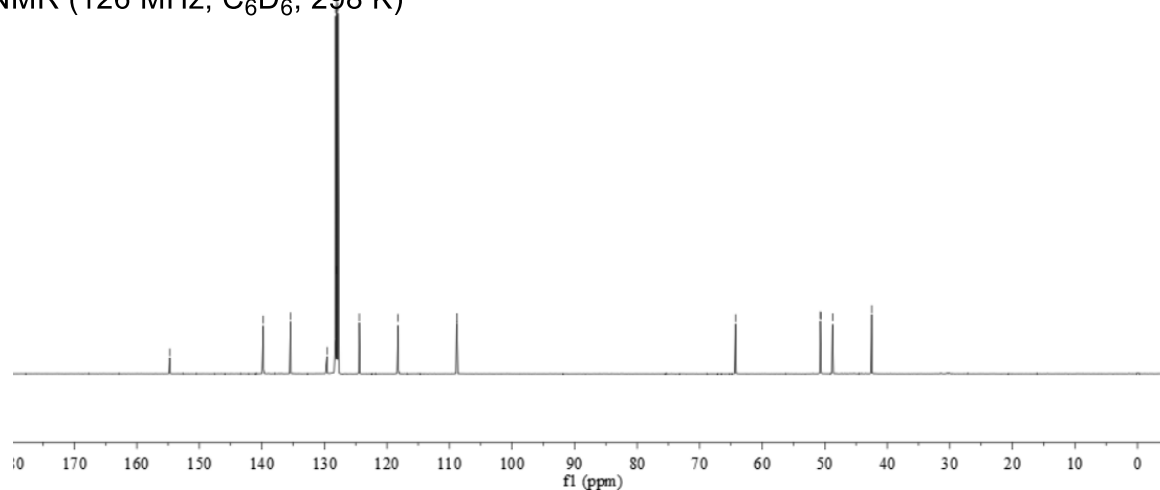

Supplement: d0cc04996d1.pdf [file d0cc04996d1.pdf]
